# Supplementary material for: Gene prediction in the immunoglobulin loci
Source: HighWire-hosted journal article supplement (doi:10.1101/gr.276676.122), 2022-05-11
Supplement: Supplemental_Table_S19.xlsx [file Supplemental_Table_S19.xlsx]

## Sheet: caption
Supplemental Table S19. A list of IGHV genes detected by IgDetective in the iterative mode.

## Sheet: chimp
contig	reference strand	heptamer index	nonamer index	heptamer	nonamer	best aligned human gene	alignment direction	alignment PI	longest common k-mer	start of gene	gene sequence
IGH_NC_036894.1	+	8847836	8847865	CACAGTG	GACACAAAC	IGHV3-72*01	+	91.0596	18	8847534	GAGGTGCAGCTGGTGGAGTCTGGGGGAGGCTTGGTCCAGCCTGGGGGTTCTCTGAGACTCTCATGTGCAGCCTCTGGATTCACCTTCAGTGACCACTACATGAGCTGGGTCCGCCAGGCTCAAGGGAAAGGGCTAGAGTTGGTAGGTTTAATAAGAAACAAAGCTAACAGTTACACGACAGAATATGCTGCGTCTGTGAAAGGCAGATTTACCATCTCAAGAGAGGATTCAAAGAACACGCTGTATCTGCAAATGAGCAGCCTGAAAACCGAGGACTTGGCCGTGTATTACTGTGCTAGAGA
IGH_NC_036894.1	+	8862689	8862718	CACAGTG	GTCAAAACC	IGHV1-18*01	+	94.9324	57	8862393	CAGGTGCAGCTGGTGCAGTCTGGAGCTGAGGTGAAGAAGCCTGGAGCCTCAGTGAAGGTCTCCCGCAAGGCTTCTGGTTACACCTTTACCAGCTACTATATGCACTGGGTGTGACAGGCCCCTGGACAAGGGCTTGAGTGGATGGGATGGATCAACACTTACAATGGTAACACAAACTATGCACAGAAGCTCCAGGGCAGAGTCACCATGACCAGAGACACATCCACGAGCACAGCCTACATGGAGCTGCGCAGCCTGAGATCTGACGACATGGCCGTGTATTACTGTGCGAGAGA
IGH_NW_019933031.1	+	6857	6886	CACAGTG	GACACAAAC	IGHV3-30*01	+	95.2703	20	6566	CAGGTGCGGCTGGTGGAGTCTGGGGGAGGCGTGGTCCAGCCTGGGAGGTCCTGAGACTCTCCTGTGCAGCCTCTGGATTCACCTTCAGTAGCTACATGAACTGGGTCCGCCAGGCTCCAGGGAAGGGGCTGGAGTGGGTGGCATTTATACAGTATGATGGAAGTAATAAATACTATGCAGACTCCGTGAAGGGCCGATTCACCATCTCCAAGACAATTCCAAGAACACGCTGTATCTTCAAATGAACAGCCTGAGAGCTGAGGACACGGCTGTGTATTACTGTGCGAGAGA
IGH_NW_019933075.1	+	182854	182883	CACAGTG	GACACAAAT	IGHV3-11*01	+	88.1757	21	182558	AGGTGCAGCTGGTAGAGTCTGGGAGAGGCTTGGCCCAGCCTGGGGGGGTACCTAAAACTCTCCGGTGCAGCCTCTGGATTCACCGTCGGTAGCTGGTACATGAGCTGGATCCACCAGGCTCCAGGGAAGGGTCTGGAGTGGGTCTCATACATTAGTAGTAGTGGTTGTAGCACAAACTACACAGACTCTGTGAAGGGCAGATTCACCATCTCCAGAGACAACTCAAAGAACACACTCTACCTGCAAATGAACAGCCTGAGAGTGGAGGGCACGGCCGTGTATTACTGTGCAAGAGA
IGH_NW_019933462.1	+	5765	5794	CACAGTG	GACACAAAC	IGHV3-30*01	+	96.9595	20	5469	CAGGTGCAGCTGGTGGAGTCTGGGGGAGGCGTGGTCCAGCCTGGGAGGTCCCTGAGACTCTCCTGTGCAGCCTCTGGATTCACCTTCAGTAGCTATGGCATGCACTGGGTCCGCCAGGCTCCAGGCAAGGGGCTGGAGTGGGTGGCATTTATATCGTATGATGGAAGTAATAAACACTATGCAGACTCCGTGAGGGGCAGATTTACCATCTCCAGAGACAATTCCAAGAACACGCTGTATCTTCAAATGAACAGACTGAGAGCTGAGGACACGGCTGTGTATTACTGTGCGAGAGA
IGH_NW_019933462.1	+	53971	54000	CACAGTG	GACACAAAC	IGHV3-30*01	+	93.9189	20	53675	CAGGTGCGGCTGGTGGAGTCTGGGGGAGGCGTGGTCCAGCCTGGGAGGTCCTTGAGACTCTCCTGTGCAGCCTCTGGATTCACCTTCAGTAGCTACCACATGAACTGGGTCCGCCAGGCTCCAGGGAAGGGGCTGGAGTGGGTGGCATTTATACAGTATGATGGAAGTGGTAAATACTATGCAGACTCCGTGAAGGGCCGATTCACCATCTCCAAAGACAATTCCAAGAGCATGCTGTATCTTCAAATGAACAGCCTGAGAGCTGAGGACACGGCTGTGTATTACTGTGCGAGAGA
IGH_NW_019933462.1	+	29541	29570	CACAGTG	CACAAACCT	IGHV3-30*01	+	98.3108	20	29245	CAGGTGCGGCTGGTGGAGTCTGGGGGAGGCGTGGTCCAGCCTGGGAGGTCCTTGAGACTCTCCTGTGCAGCCTCTGGATTCACCTTCAGTAGCTATGGCATGCACTGGGTCCGCCAGGCTCCAGGCAAGGGGCTGGAGTGGGTGGCAGTTATATCGTATGATGGAAGTAATAAATACTATGCAGACTCCGTGAAGGGCCGATTCACCATCTCCAGAGACAATTCCAAGAACACGCTGTATCTTCAAATGAACAGCCTGAGAGCTGAGGACACGGCTGTGTATTACTGTGCGAGAGA
IGH_NW_019933462.1	+	77681	77710	CACAGTG	GACACAAAC	IGHV3-30*01	+	93.9189	20	77385	CAGGTGCGGCTGGTGGAGTCTGGGGGAGGCGTGGTCCAGCCTGGGAGGTCCTTGAGACTCTCCTGTGCAGCCTCTGGATTCACCTTCAGTAGCTACCACATGAACTGGGTCCGCCAGGCTCCAGGGAAGGGGCTGGAGTGGGTGGCATTTATACAGTATGATGGAAGTGGTAAATACTATGCAGACTCCGTGAAGGGCCGATTCACCATCTCCAAAGACAATTCCAAGAGCATGCTGTATCTTCAAATGAACAGCCTGAGAGCTGAGGACACGGCTGTGTATTACTGTGCGAGAGA
IGH_NW_019933749.1	+	40798	40827	CACAGTG	GACACAAAC	IGHV3-15*01	+	96.0396	11	40495	GAGGTGCAGCTGGTGGAGTCTGCGGGAGGCCTTGGTACTGCCTGGGGGGTCCCTTAGACTCTCCTGTGCAGCCTCTGGATTCACTTTCAGTAACGCCTGGATGAGCTGGGTCCGCCAGACTCCAGGGAAGGGGCTGGAGTGGGTTGGCTGTATTAAAAGCAAAGCTAATGGTGGGACAACAGACTACGCTGCACCTGTGAAAGGCAGATTCACCATCTCAAGAGATGATTCAAAAAACACGCTGCATCTGCAAATGAACAGCCTGAAAACCGAGGACACGGCCGTATATTACTGTACCACAGA
IGH_NW_019934737.1	+	15628	15657	CACAGTG	GACACAAAC	IGHV3-15*01	+	96.3576	21	15327	GAGGTGCAGCTGGTGGAGTCTGCGGAGGCCTTGGTACAGCCTGGGGGGTCCCTTAGACTCTCCTGTGCAGCCTCTGGATTCACTTTCAGTAACCCTGGATGAGCTGGGTCCGCCAGGCTCCAGGGAAGGGGCTGGAGTGGGTTGGCCGTATTAAAAGCAAAGCTAATGGTGGGACAACAGACTACGCTGCACCTGTGAAAGGCAGATTCACCATCTCAAGAGATGATTCAAAAAACACGCTGTATCTGCAAATGAACAGCCTGAAAACCAAGGACACGGCCGTGTATTACTGTACCACAGA
IGH_NW_019937189.1	+	243621	243650	CACAGTG	GTCAAAAAC	IGHV1-18*01	+	82.8283	23	243339	CAGGTGCGGCTAGTGCAGTCTGGGGCTGAGGTGAAGAAGCCTGGTCCTCAGTGAAGGTCTCCTACAAGGCTTTACAAGCTCTGCTATGCAGTGAGTGCAACAAGCCCATGGACAAGGCCTTGAGTGGATTAGATGGATCATCGCTGGCAATGGTAACACAGGCTATGCACAGAACATCCAGGCCAGAGTCAACATGACCACATACATGCCTACAAGCACAGCCTACATGGAGCTGAGCAGCCTGAGATCTGAGGACATGGCCGTGTATTACTGTGTGAGAGA
IGH_NW_019937189.1	+	259657	259686	CACAGTG	GACAAAAAC	IGHV3-74*01	+	95.9459	12	259361	GAGGTGCAGCTGGTGGAGTCTGGGGGAGGCTTAGTACAGCCTGGAGGGTCCCTGAGACTCTCCTGTGCAGCCTCTGGATTCACCTTCAGTAGCTACTGGATGCACTGGGTCCGCCAAGCTCCAGGGAAGGGGCTGGTGTGGGTCTCACGTATTAATAGTGATGGGAGTAGCACAAGCTACGCAGACTCCTTGAAGGGCCAATTCACCATCTCCAGAGACAATGCTAAGAACACGCTGTATCTGCAAATGAACAGTCTGAGAGCTGAGGACATGGCTGTGTATTACTGTACTAGAGA
IGH_NW_019937189.1	+	230771	230800	CACAGTG	GACACAAAT	IGHV3-11*01	+	88.4746	23	230476	AGGTGCAGCTGGTAGAGTCTGGGAGAGGCTTGGGCCAGCCTGGGGGGTACCTAAAACTCTCCGGTGCAGCCTCTGGATTCACCGTCGGTAGCTGGTACATGAGCTGGATCCACCAGGCTCCAGGGAAGGGTCTGGAGTGGGTCTCATACATTAGTAGTAGTGGTTGTAGCACAAACTACACAGACTCTGTGAAGGGCAGATTCACCATCTCCAGAGACAACTCAAAGAACACGCTTTACCTGCAAATGAACAGCCTGAGAGTGGAGGACACGGCCGTGTATTACTGTGCAAGAGA
IGH_NW_019937202.1	+	21282	21311	CACAGTG	GACACAAAC	IGHV3-15*01	+	96.3696	21	20979	GAGGTGCAGCTGGTGGAGTCTGCGGGAGGCCTTGGTACAGCCTGGGGGGTCCCTTAGACTCTCCTGTGCAGCCTCTGGATTCACTTTCAGTAATGCCTGGATGAGCTGGGTCTGCCAGGCTCCAGGGAAGGGGCTGGAGTGGGTTGGCTGTATTAAAAGCAAAGCTAATGGTGGGACAACAGACTACGCTGCACCTGTGAAAGGCAGATTCACCATCTCAAGAGATGATTCAAAAAACATGCTGTATCTGCAAATGAACAGCCTGAAAACCGAGGACACGGCCGTGTATTACTGTACCACAGA
IGH_NC_036893.1	-	86929858	86929829	CACAGTG	GACACAAAC	IGHV3-30*01	+	94.1176	13	86929865	CAGGTGCGGCTGGTGGAGTCTGGGGGAGGCGTGGTCCAGCCTGGGAGGTCCTTGAGACTCTCCTGTGCAGCCTCTGGATTCACCTTCAGTAGCTACCACATGAACTGGGTCCGCCAGGCTCCAGGGAAGGGGCTGGAGTGGGTGGCATTTATACAGTATGATGGAAGTGGTAAATACTATGCAGACTCCGTGAAGGGCCGATTCACCATCTCCAAAGACAATTCCAAGAGCATGCTGTATCTTCAAATGAACAGCCTGAGAGCTGAGGACACGGCTGTGTATTACTGTG
IGH_NC_036893.1	-	87420590	87420561	CACAGTG	GACACAAAC	IGHV3-52*01	+	94.8097	13	87420597	GAGGTGCAGCTGGTGGAGTCTGGGTGAGGCTTGGTACAGCCTGGAGGGTCCCTGAGACTCTCCTTTGCAGCCTCTGGATTCACCTTCAGTAGCTCCTGGATGCACTGGGTCTGCCAGGCTCCAGAGAAGGGGCTGGAGTGGGTGGCCGACATAAAGTGTGTTGGAAGTGAGAAATACTATGCAGACTCTGTGAAGGGCTGATTGACCATCTCCAGAGACAACGCCAAGAACTCCTTGTATCTACAAATGAACAGCCTGAGAGCTGAGGACACAGCTGTGTATTACTGTG
IGH_NC_036893.1	-	87518689	87518660	CACAGTG	GTCAGAAAC	IGHV1-68*01	+	96.8858	28	87518696	CAGGTGCAGCTGGGGCAGTCTGAGGCTGAGGTGAAGAAGCCTGGGTCCTCAGTGAAGGTCTCCTGCAAGGCTTCCGGATACACCTTCACCTACTGCTCTTGCACTGGTTGCAACAGGCCCCTGGACAAGGGCTTGAATGGATGAGATGGATCACACTTTACAATGGTAACACCAACTATGCAAAGAAGTTCCAGGGTAGAGTCACCATTACCAGGGACATGTCCCTGAGCACAGCCTACATGGAGCTGAGCAGCCTGAGATCTGAGGACTCGGCTGTGTATTACTGGG
IGH_NC_036893.1	-	87453100	87453071	CACAGTG	GACACAAAC	IGHV4-30-4*02	+	96.2329	22	87453107	CAGCTGCAGCTGCAGGAGTCGGGCCCAGGACTGGTGAAGCCTTCACAGACCCTGTCCCTCACCTGCACTGTCTCTGGTGGCTCCATCAGCAGTGGTAGTTACTACTGGAGCTGGATCCGGCAGCCCGCCGGGAAGGGACTGGAGTGGATTGGGTATATCTATTATAGTGGGAGCACCTACTACAACCCATCCCTCAAGAGTCGAGTCACCATATCAGTAGACACGTCCAAGAACCAGTTCTCCCTGAAGCTGAGCTCTGTGACCGCCGCAGACACGGCCGTGTATTACTGTG
IGH_NC_036893.1	-	87219308	87219277	CACAGTG	CAGAAACCC	IGHV1-24*01	+	96.1938	24	87219315	CAGGTCCAGCTGGTACAGTCCGGGGCTGAGGTGAAGAAGCCTGGGGCCACCGTGAAAATCTCCTGCAAGGCTTCCGGATACACCCTCACCGAATTATCCATGCACTGGGTGCGACAGGCTCCTGGAAAACGGCTTGAGTGGATGGGAGGTTTTGATCCTGAAGATGGTGAAACAATATACACACAGAAGTTCCAGGGCAGAGTCACCATGACCGAGGACACGTCTACAGACACAGCCTACATGGAGCTGAGCAGCCTGAGATCTGAGGACACGGCCGTGTATTACTGTG
IGH_NC_036893.1	-	87481027	87480998	CACAGTG	GACACAAAC	IGHV3-22*01	+	91.5254	15	87481034	GAGGTGCAGCTGGTGGAGTCTGGGGGAGGCTTGGTACAGCCTGGGGGGTCCCTGAGACTCTCCTGTGCAGCCTCTGGATTCACCTTCCGTTAACTACTGCATGCAGTGGATCCGCCGGGCTCCAGGAAAGGGGCTGGAGTGGGTAGGTTTCACTAAAAACAAAACTAATCGTGGAACAACAGAATACGCCGCGTCTGTGAAAGGCAGATTCACTATCTCAAGAGATGATTCCAAAAGCATTGCCTATCTGCAAATGAACAGCCTGAAAACCGAGGACACAGCCGTGTATTACTGTA
IGH_NC_036893.1	-	87578539	87578510	CACAGTG	GACAAAAAC	IGHV3-74*01	+	98.9583	12	87578546	GAGGTGCAGCTGTTGGAGTCTGGGGGAGGCTTAGTTCAGCCTGGGGGGTCCCTGAGACTCTCCTGTGCAGCCTCTGGATTCACCTTCAGTAGCTACTGGATGCACTGGGTCCGCCAAGCTCCAGGGAAGGGGCTGGAGTGGGTCTCACGTATTAATAGTGATGGGAGTAGCACAAGCTACGCGGACTCCGTGAAGGGCCGATTCACCATCTCCAGAGACAACGCCAAGAACACGCTGTATCTGCAAATGAACAGTCTGAGAGCCGAGGACACGGCTGTGTATTACTGTA
IGH_NC_036893.1	-	87052933	87052904	CACAGTG	GTCAGAAAC	IGHV1-3*01	+	98.6159	35	87052940	CAGGTCCAGCTGGTGCAGTCTGGGGCTGAGGTGAAGAAGCCTGGGGCCTCAGTGAAGGTTTCCTGCAAGGCTTCTGGATACACCTTCACTAGCTATGCTATGCATTGGGTGCGCCAGGCCCCCGGACAAAGGCTTGAGTGGATGGGATGGATCAACACTGGCAATGGTAACACAAAGTATTCACAGAAGTTCCAGGGCAGAGTCACCATTACCAGGGACACATCCGCGAGCACAGCCTACATGGAGCTGAGCAGCCTGAGATCTGAGGACACGGCTGTGTATTACTGTG
IGH_NC_036893.1	-	87412967	87412937	CACAGTG	CTAAAACCC	IGHV5-51*01	+	99.654	20	87412974	GAGGTGCAGCTGGTGCAGTCTGGAGCAGAGGTGAAAAAGCCCGGGGAGTCTCTGAAGATCTCCTGTAAGGGCTCTGGATACAGCTTTACCAGCTACTGGATCGGCTGGGTGCGCCAGATGCCCGGGAAAGGCCTGGAGTGGATGGGGATCATCTATCCTGGTGACTCTGATACCAGATACAGCCCGTCCTTCCAAGGCCAGGTCACCATCTCAGCCGACAAGTCCATCAGCACCGCCTACCTGCAGTGGAGCAGCCTGAAGGCCTCGGACACCGCCATGTATTACTGTG
IGH_NC_036893.1	-	87542289	87542260	CACAGTG	GACACAAAC	IGHV3-22*01	+	97.2881	21	87542296	GAGGTGCAGCTGGTGGAGTCTAGGGGAGGCTTGGTACAGCCTGGGGGGTCCCTGAGACTCTCCTGTGCAGTCTCTGGATTCACATTCAGTGACTACTACATGAGCTGGGTCCGCCAGGCTCCCGGGAAGGGGCTGGAGTGGGTAGGTTTCATTAGAAACAAAGCTAATGGTGGGACAACAGAATACACCACGTCTGTGAAAGGCAGATTCACAATCTCAAGAGATGATTCCAAAAGCATCACCTATCTGCAAATGAACAGCCTGAAAACCGAGGACACGGCCGTGTATTACTGTT
IGH_NC_036893.1	-	87375964	87375935	CACAGTG	GATACAAAC	IGHV3-47*01	+	98.6014	13	87375971	GAGGATCAGCTGGTGGAGTCTGGGGGAGGCTTGGTACAGCCTGGGGGGTCCCTGAGACCCTCCTGTGCAGCCTCTGGATTCGCCTTCAGTAGCTATGTTCTGCACTGGGTTCGCCGGGCTCCAGGGAAGGGTCTGGAGTGGGTATCAGCTATTGGTACTGGTGGTGATACATACTATGCAGACTCCGTGATGGGCCGATTCACCATCTCCAGAGACAACGCCAAGAAGTCCTTGTATCTTCAAATGAACAGCCTGATAGCTGAGGACATGGCTGTGTATTACTGTG
IGH_NC_036893.1	-	87441317	87441288	CACAGTG	GACAAAAAC	IGHV4-4*07	+	97.5524	22	87441324	CAGCTGCAGCTGCAGGAGTCGGGCCCAGGACTGGTGAAGCCTTCGGAGACCCTGTCCCTCACCTGCACTGTCTCTGGTGGCTCCATCAGTAGTTACTACTGGAGCTGGATCCGGCAGCCACCAGGGAAGGGACTGGAGTGGATTGGGTATATCTATTACAGTGGGAGCGCCTACTACAACCCATCCCTCAAGAGTCGAGTCACCATATCAGTAGACACGTCCAAGAACCAGTTCTCCCTGAAGCTGAGCTCTGTGACCGCCGCAGACACGGCCGTGTATTACTGTG
IGH_NC_036893.1	-	87276921	87276892	CACAGTG	GACACAAAC	IGHV3-30*01	+	96.8858	13	87276928	CAGGTGCGGCTGGTGGAGTCTGGGGGAGGCGTGGTCCAGCCTGGGAGGTCCCTGAGACTCTCCTGTGCAGCCTCTGGATTCACCTTCAGTAGCTATGGCATGAACTGGGTCCGCCAGGCTCCAGGGAAGGGGCTGGAGTGGGTGGCATTTATACAGTATGATGGAAGTAATAAATACTATGCAGACTCCGTGAAGGGCCGATTCACCATCTCCAAAGACAATTCCAAGAACACGCTGTATCTTCAAATGAACAGCCTGAGAGCTGAGGACACGGCTGTGTATTACTGTG
IGH_NC_036893.1	-	87472990	87472959	CACAGTG	CAGAAACCT	IGHV3-64*03	+	93.0796	13	87472997	GAGGTGCAGCTGGTGGAGTCTGGGGGAGGCTTGGTACAGCCTGGGGGGTCCCTAAGACTCTCCTGTGCAGCCTCTGGATTCACCTTCAGTAGCTATGCTATGCACTGGGTTCGCCAGGCACCAGGGAAGGGTCTGGAGTGGGTCTCACTTATTTATAGTGGTGATAGCACATACTACGCAGACTCCGTGAAGGGCAGATTCACCATCTCCAGAGACAATTCCAAGAACACGCTGTATCTTCAAATGGGCAGCCTGAGAGCTGAGGACACGGCTGTGTATTACTGTG
IGH_NC_036893.1	-	87570640	87570611	CACAGTG	GACACAAAC	IGHV3-73*01	+	98.6395	22	87570647	GAGGTGCAGCTGGTGGAGTCTGGGGGAGGCTTGGTCCAGCCTGGGGGGTCCCTGAGACTCTCCTGTGCAGCCTCTGGGTTCACCTTCAGTGGCTCTGCTATGCACTGGGTCCGCCAGGCTTCCGGGAAAGGGCTAGAGTGGGTTGGCCGTATTAGAAGCAAAGCTAACAGTTACGCGACAGCATATGCTGCGTCGGTGAAAGGCAGGTTCACCATCTCCAGAGATGATTCCAAGAACACGGCGTATCTGCAAATGAACAGCCTGAAAACCGAGGACACGGCCGTGTATTACTGTG
IGH_NC_036893.1	-	86947280	86947249	CACAGTG	CAGAAAGCC	IGHV7-34-1*01	+	98.2517	39	86947287	CTGCAGCTGGTGCAGTCTGGGCCTGAGGTGAAGAAGCCTGGGGCCTCAGTGAAGGTCTCCTATAAGTCTTCTGGTTACACCTTCACCATCTATGGTATGAATTGGGTATGATAGACCCCTGGACAGGGCCTTGAGTGGATGGGATGGATCATCACCTACACTGGGAACCCAACGTATACCCACGGCTTCACAGGATGGTTTGTCTTCTCCATGGACACGTCTGTCAGCACGGCATATCTTGAGATCAGCAGCCTAAAGGCTGAGGACACGGCCGAGTATTACTGTG
IGH_NC_036893.1	-	87143744	87143715	CACAGTG	GACACAAAT	IGHV3-43*01	+	95.8621	14	87143751	GAAGTGCAGCTGGTGGAGTCTGGGGGAGGCTTGGTACAGCCTGGGGGGTCCCTGAGACTCTCCTGTGCAGCCTCTGGATTCACCTTTGATGATTATGGCATGAGCTGGGTCCGCCAAGCTCCAGGGAAGGGTCTGGAGTGGGTCTCTCTTATTAGTTGGGATGGTGGTAGCACATACTATGCAGATTCTGTGAAGGGTCGATTCACCATCTCCAGAGACAACAGCAAAAACTCCCTGTATCTGCAAATGAGCAGTCTGAGAGCTGAGGACACCGCCTTGTATTACTGTGCG
IGH_NC_036893.1	-	87209273	87209244	CACAGTG	GACACAAAC	IGHV3-23*01	+	93.7716	22	87209280	GAGGTGCAGCTGGTGGAGTCTGGGGGAGGCTTGGTAAAGCCTGGGGGTTCCCTGAGACTCTCGTGTGCAGCCTCTGGATTCACCTTCAGTAGCTATGCTATGCACTGGGTCCGCCAGGCTCCAGAGAAGGGGCTGGAGTGGGTCTCAACTATTAGTGGTAGTGGTGGTAGCACGTGGTACCCAGACTCTGTCAAGGGCCGATTCACCATCTCCAGAGACAATTCCAAGAACACGCTGTATCTGCAAATGAACAGCCTGAGAGCCGAGGACACGGCCGTGTATTACTGTG
IGH_NC_036893.1	-	87175688	87175659	CACAGTG	GACACAAAC	IGHV3-21*01	+	94.8097	11	87175695	GAGGTGCAGCTGGTGGAGTCTGGGGGAGGCTTGGTACAGCCTGGGGGGTCCCTGAGACTCTCCTGTGCAGCCTCTGGATTCACCTTCAGTAGCTATGGCATGCACTGGGTCCGCCAGGCTCCAGGGAAGGGACTGGAGTGGGTTTCATACATTAGTTATGATAGTAGTTACATATACTACGCGGACTCAGTGAAGGGCCGATTCACCATCTCCAGAGACAACGCCAAGAACTCACTATATCTGCAAATGAACAGCCTGAGAGCCGAGGACACGGCTGTTTATTACTGTG
IGH_NC_036893.1	-	87109980	87109951	CACAGTG	GACACAAAC	IGHV3-7*01	+	97.2222	12	87109987	GAGGTGCAGCTGGTGGAGTCGGGGGGAGGCTTGGTCCAGCCTGGGGGGTCCCTGACACTCTCCTGTGCAGCCTCTGGATTCACCTTCAGTAGCTATTGGATGAGCTGGGTCCGCCAGGCTCCGGGGAAGGGGCCGGAGTGGGTGGCCAACATAAAGAAAGATGGAAGTGAGAAATACTATGCGGACTCTGTGAAGGGCCGATTCACCATCTCCAGAGACAACGCCAAGAACTCACTGTATCTGCAAATGAACAGCCTGAGAGCCGAGGACACGGCTGTGTATTACTGTA
IGH_NC_036893.1	-	86943642	86943613	CACAGTG	GACAAAAAC	IGHV4-34*01	+	96.1538	13	86943649	CAGGTGCAGCTACAGCAGTGGGGCACAGGACTGGTGAAGCCTTCGGAGACCCTGTCTCTCACCTGCGCTGTCTATGGTGGGTCCTTCAGTGGTTACTACTGGGGCTGGATCCGCCAGCCCCCAGGGAAGGGGCTGGAGTGGATTGGGCATATCAATTATGGTGGGAGCACCAACTACAACCCGTCCCTCAAGAGTCGAGTTACCATATCAGTAGACAAGTCCAAGAACCAGTTCTCCCTGAAGCTGAGCTCTGTGACCGCCGCGGACACGGCTGTGTATTACTGTG
IGH_NC_036893.1	-	87368340	87368311	CACAGTG	GTCAGAAAC	IGHV1-46*01	+	94.8097	38	87368347	CAGGTGCAGCTGGTGCAGTCTGGGGCTGAGGTGAAGAAGCCTGGGGCCTCAGTGAAGGTTTCCTGCAAGGCTTCTGGATACACCTTCACCAGTTATACTATCAGCTGGCTGCGACAGGCCCCTGGACAAGGGCTTGAGTGGATGGGAGTAATCAGCCCTAGTGATGGTAGCACAAGCTACGCACAGAAGTTCCAGGGCAGAGTCACCATGACCAGGGACACGTCCACAAGCACAGTCTACATGGAGCTGAGCAGCCTGAGATCTGAGGACACAGCTGTGTATTACTGTG
IGH_NC_036893.1	-	87072935	87072906	CACAGTG	GTCAAAAAC	IGHV7-4-1*01	+	98.9619	49	87072942	CAGGTGCAGCTGGTGCAATCTGGGTCTGAGGTGAAGAAGCCTGGGGCCTCAGTGAAGGTTTCCTGCAAGGCTTCTGGATACACCTTCACTAGCTATGCTATGAATTGGGTGCGACAGGCCCCTGGACAAGGGCTTGAGTGGATGGGATGGATCAACACCAACACTGGGAACCCAACGTATGCCCAGGGCTTCACAGGACGGTTTGTCTTCTCCTTGGACACTTCTGTCAGCACGGCATATCTGCAGATCAGCAGCCTAAAGGCTGAGGACACTGCCGTGTATTACTGTG
IGH_NC_036893.1	-	87528699	87528670	CACAGTG	GTCAGAAAC	IGHV1-69*01	+	97.9239	49	87528706	CAGGTCCAGCTGGTGCAGTCCGGGGCTGAGGTGAAGAAGCCTGGGTCCTCAGTGAAGGTCTCCTGCAAGGTTTCTGGAGGCACCTTCAGCAGCTATGCTATCAGCTGGGTGCGACAGGCCCCTGGACAAGGGCTTGAGTGGATGGGAGTGATCATCCCTATCCTTGGTACAGCAAACTACGCACAGAAGTTCCAGGGCAGAGTCACGATTACCGCGGACGAATCCACGAGCACAGCCTACATGGAGCTGAGCAGCCTGAGATCTGAGGACACGGCCGTGTATTACTGTG
IGH_NC_036893.1	-	87495571	87495540	CACAGTG	CAGTAACCC	IGHV1-46*01	+	88.9273	24	87495578	CAGGTGCAGCTGGTGCAGTCTGGGGATGAGATGAAGAAGGCTGGGGCATCAGTGAAAGCCTCCTGCAAGACTTGTGGATACACCTTCACCAGTTACTCTATGCACTAGGTGCGCCAGGCCCATGCACAAGGGCTTGAGTGGATGGGAAGGATGTGCCCTAGTGATGGCAGCACAAGCTACGCAGAGAAGTTCCAGGGCAGAGTCACCATGACCAGGGGCACATCCATCAGCACAGCCTACATGAAGCTGAGCAGCCTGAGATCTGAAGACACGGCCATGTATTACTGTG
IGH_NC_036893.1	-	87364215	87364186	CACAGTG	GTCAGAAAC	IGHV1-45*01	+	97.9239	26	87364222	CAGATGCAGCTGGTGCAGTCTGGGGCTGAGGTGAAGAAGCCTGGGTCCTCAGTGAAGGTTTCCTGCAAGGCTTCCGGATACACCTTCACCTACCGCTACCTGCACTGGGTGCGACAGGCCCCTGGACAAGCGCTTGAGTGGATGGGATGGATCACACCTTACAATGGTAACACCAACTACGCACAGAAATTCCAGGACAGAGTCACCATTACCAGGGACAGGTCTATGAGCACAGCCTACATGGAGCTGCGCAGCCTGAGATCTGAGGACTCAGCCGTGTATTACTGTG
IGH_NC_036893.1	-	87002431	87002402	CACAGTG	GACACAAAC	IGHV6-1*01	+	98.9933	13	87002438	CAGGTACAGCTGCAGCAGTCAGGTCCAGGACTGGTGAAGCCCTCGCAGACCCTCTCACTCACCTGTGCCATCTCCAGGGACAGTGTCTCTAGCAACAGTGCTGCTTGGAACTGGATCAGGCAGTCCCCATCGAGAGGCCTTGAGTGGCTGGGAAGGACATACTACAGGTCCAAGTGGTATAATGATTATGCAGCATCTGTGCAAAGTCGAATAACCATCAACCCAGACACATCCAAGAACCAGTTCTCCCTGCAGCTGAACTCTGTGACTCCCGAGGACACGGCTGTGTATTACTGTG
IGH_NC_036893.1	-	87231476	87231447	CACAGTG	GACACAAAC	IGHV3-25*01	+	95.8478	9	87231483	GAGATGCAGCTGGTGGAGTCTGGGGGAGGCTTGGCAAAGCCTGGGCAGTCCCCGAGACTCTCCTGTGCAGCCTCTCGATTCACCTTCAGTAGCTACTACATGAACTATGTCCGCCAGGCTCCAGGGAATAGGCTGGAGTTGGTTGGACAAGTTAATCCTAATGGGGGTAGCACATAACTCATAGACTCCGGGAAGGGCCGATTCACTACCTCCAGAGATAACGCCAAGAACACTCTTCATCTGCAAATGAACAGCCTGAAAACCGAGGACATGGCCCTGTATTAGTGTA
IGH_NC_036893.1	-	87034800	87034771	CACAGTG	GTCAGAAAC	IGHV1-2*01	+	94.4444	47	87034807	CAGGTGCAGCTGGTGCAGTCTGGGGCTGAGGTGAAGAAGCCTGGGGCCTCAGTGAAGGTCTCCTGCAAGGCGTCTGGATACACCTTCACCAACTACTTTATACACTGGGTGCGACAGGCTCCTGGACAAGGGCTTGAGTGGATGGGACGGATCAACCCTAACAGTGGTGGCACAAACTACGCACAGAAGTTTCAGAGCAGGGTCACCATGACCAGGAACACGTCCATCAGCACAGACTACATGGAGCTGAGCAGCCTGAGATCTGAGGACACGGCCACGTATTACTGTA
IGH_NC_036893.1	-	87198400	87198371	CACAGTG	GACACAAAC	IGHV3-49*01	+	93.2203	15	87198407	GAGGTGCAGCTGGTGGAGTCTGGGGGAGGCTTGGTAAAGCCTGGGGGATCCCTGAGACTCTCCTGTGCAGCCTCTGGATTCACCTTCAGTAGCTATAGCATGAACTGGGTCCGCCAGGCTCCAGGGAAGGGGCTGGAGTGGGTAGGTTTCATTAGAACCAAAGCTAAAGGTGGGACAACAGAATACGCCGCGTCTGTGAAAGGCAGATTCACTATCTCAAGAGATGATTCCAAAAGCATTGCCTATCTGCAAATGAACAGCCTGAAAACCGAGGACACAGCCGTGTATTACTGTA
IGH_NC_036893.1	-	87426884	87426855	CACAGTG	GACACAAAC	IGHV3-66*02	+	97.5524	13	87426891	GAGGTGCAGCTGGTGGAGTCTGGAGGAGGCTTGGTCCAGCCTGGGGGGTCCCTGAGACTCTCCTGTGCAGCCTCTGGATTCACCGTCAGTAGCTACCACATGAGCTGGGTCCGCCAGGCTCCAGGGAAGGGGCTGGAGTGGGTCTCAGTTATTTATAGTGGTGGTAGCACATACTACGCAGACTCCGTGAAGGGCCGATTCACCATCTCCAGAGACAATTCCAAGAACACGCTGTATCTGCAAATGAACAGCCTGAGAGCTGAGGACACGGCTGTGTATTACTGTG
IGH_NC_036893.1	-	87557744	87557715	CACAGTG	GACACAAAC	IGHV3-72*01	+	97.9592	21	87557751	GAGGTGCAGCTGCTGGAGTCTGGGGGAGGCTTGGTACAGCCTGGGGGGTCCCTGAGACTCTCCTGTGCAGCCTCTGGATTCACCTTCAGTGACTACTACATGGACTGGGTCCGCCAGGCTCCAGGGAAGGGGCTGGAGTGGGTTGGCCGTATTAGAAACAAAGCTAACAGTTACACCACAGAATACGCCGCGTCTGTGAAAGGCAGATTCACCATCTCAAGAGATGATTCAAAGAACTCACTGTATCTGCAAAGGAACAGCCTGAAAACCGAGGACACGGCCGTGTATTACTGTA
IGH_NC_036893.1	-	87130720	87130691	CACAGTG	GTCAGAAAC	IGHV1-2*01	+	93.4256	53	87130727	CAGGTGCAGCTGGTGCAGTCCGGGGCTGAGGTGAAGAAGCCTGGGGCCTCAGTGAAGGTCTCCTGCAAGGCTTCTGGATACACCTTCACCAGCTATGATATCAACTGGGTGCGACAGGCCACTGGACAAGGGCTTGAGTGGATGGGATGGATGAACCCTAACAGTGGTAACACAGGCTATGCACAGAAGTTCCAGGGCAGAGTCACCATGACCAGGGATACGTCCATAAGCACAGCCTACATGGAGCTGAGCAGCCTGAGATCTGAGGACACGGCCGTGTATTACTGTG
IGH_NC_036893.1	-	87489978	87489949	CACAGTG	GACACAAAC	IGHV3-66*02	+	96.8531	13	87489985	GAGGTGCAGCTGGTGGAGTCTGGAGGAGGCTTGGTCCAGCCTGGGGGGTCCCTGAGACTCTCCTGTGCAGCCTCTGGATTCACCTTCAGTAGCTACCACATGAGCTGGGTCCGCCAGGCTCCAGGGAAGGGGCTGGAGTGGGTCTCAGTTATTTATAGTGGTGGTAGCACATACTACGCAGACTCCGTGAAGGGCAGATTCACCATCTCCAGAGACAATTCCAAGAACACGCTGTATCTGCAAATGAACAGCCTGAGAGCTGAGGACACGGCTGTGTATTACTGTG
IGH_NC_036893.1	-	87391227	87391198	CACAGTG	GACACAAAC	IGHV3-49*01	+	99.322	15	87391234	GAGGTGCAGCTGGTGGAGTCTGGGGGAGGCTTGGTACAGCCAGGGCGGTCCCTGAGACTCTCCTGTACAGCTTCTGGATTCACCTTTGGTGATTATGCTATGAGCTGGATCCGCCAGGCTCCAGGGAAGGGGCTGGAGTGGGTAGGTTTCATTAGAAGCAAAGCTTATGGTGGGACAACAGAATACGCCGCGTCTGTGAAAGGCAGATTCACCATCTCAAGAGATGATTCCAAAAGCATCGCCTATCTGCAAATGAACGGCCTGAAAACCGAGGACACAGCCGTGTATTACTGTA
IGH_NC_036893.1	-	87259990	87259959	CACAGTG	CAGAAATCC	IGHV7-4-1*01	+	90.9091	19	87259997	CAGGTGCAGCTGGTGCAGTCTGGGCCTGAGGTGAAGAAGCCTGGAGCCTCACTGAAGGTTTCCTGCAAGGCTTCTGGATACACCTTCACAAGCTATGCTATCAGCTGGGTATGACAGGCCCATGGACAAGGGCTTGAGGAAATGGGATGGATCAACACCAACACTAGGAACCTAACATATGCCCAGGGCTTCACAGGACGGTTTGTCTTCTCCATGGACACCTCCGTCAGCATGGCATATCTTCATATCAGCAGCCTAAAGGCTGAGGACACGTG
IGH_NW_019933110.1	-	155283	155254	CACAGTG	GACACAAAT	IGHV3-11*01	+	88.2353	20	155290	AGGTGCAGCTGGTAGAGTCTGGGAGAGGCTTGGCCCAGCCTGGGGGGGTACCTAAAACTCTCCGGTGCAGCCTCTGGATTCACCGTCGGTAGCTGGTACATGAGCTGGATCCACCAGGCTCCAGGGAAGGGTCTGGAGTGGGTCTCATACATTAGTAGTAGTGGTTGTAGCACAAACTACACAGACTCTGTGAAGGGCAGATTCACCATCTCCAGAGACAACTCAAAGAACACACTCTACCTGCAAATGAACAGCCTGAGAGTGGAGGGCACGGCCGTGTATTACTGTG
IGH_NW_019933110.1	-	141444	141415	CACAGTG	GTCAAAAAC	IGHV1-18*01	+	82.4138	26	141451	CAGGTGCTGCTAGTGCAGTCTGGGGCTGAGGTGAAGAAGCCTGGTCCTCAGTGAAGGTCTCCTACAAGGCTTTACAAGCTCTGCTATGCAGTGAGTGCAACAAGCCCATGGACAAGGCCTTGAGTGGATTAGATGGATCATCGCGGGCAATGGTAACACAGGCTATGCACAGAACATCCAGGCCAGAGTCAACATGACCACATACATGCCTACGAGCACAGCCTACATGGAGCTGAGCAGCCTGAGATCTGAGGACATGGCCGTGTATTGCTGTG
IGH_NW_019933782.1	-	9681	9652	CACAGTG	GTCAGAAAC	IGHV1-NL1*01	+	95.8333	24	9688	CAGGTTCAGCTGTTGCAGCCTGGGGCTGAGGTGAAGAAGCCTGGGTCCTCAGTGAAGGTCTCCTGCCAGGCTTCCAGATACACCTTCACCAAATACTTTACACAGTGGGTGTGACAAAGCCCTGGACAAGGGCATAGTGGATGGGATGAATCAACCCTTACAATGATAACACACACTATGCACAGACGTTCTGGGGCAGAGTCACCATTACCAGTGACAGGTCCATGAGCACAGCCTACATGGAGCTGAGCAACCTGAGATCTGAAGACATGGTCGTGTATTACTGTG
IGH_NW_019937184.1	-	5527	5498	CACAGTG	GTCAGAAAC	IGHV1-NL1*01	+	94.0972	29	5534	CAGGTTCAGCTGTTGCAGCCTGGGGCTGAGGTGAAGAAGCCTGGGTCCTCAGTGAAGGTCTCCTGCCAGGCTTCCAGATACACCTTCACCAAATACTTTACACAGTAGGTGTGACAAAGCCCTGGACAAGGGCATAGTGGATGGGATGAATCAACCATTTCAATGATAACACACACTGTGCACAGACGTTCTGGGGCAGAGTCACCATTACCAGTGACAGGTCCACGAGCACAGCCTACATGGAGCTGAGCAGCCTGAGATCTGAAGAAATGGTCGTGTATTACTGTG
IGH_NW_019937189.1	-	290914	290885	CACAGTG	GACACAAAC	IGHV3-13*01	+	93.007	13	290921	GAGGTTCAGCTAGTGCAGTCTGGGGGAGGCTTGGTACAGCCTGGGGGGTCCCTGAGACTTTCCTGTGCAGGCTCTGGATTCACCTTCAGTAGCTATGCTATGCACTGGGTTCGCCAGGCTCCAGGAAAAGGTCTGGAGTGGGTATCAGCTATTGGTACTGGTGGTGGCACATACTATGCAGACTCCGTGAAGGGCCGATTCACCATCTCCAGAGACAATGCCAAGAACTCCTTGTATCTTCAAATGAACAGCCTGAGAGCCGAGGACATGGCTGTGTATTACTGTG
IGH_NW_019937202.1	-	418563	418534	CACAGTG	GACACAAAC	IGHV3-13*01	+	93.7063	22	418570	GAGGTTCAGCTGGTGCAGTCTGGGGGAGGCTTGGTACAGCCTGGGGGGTCCCTGAGACTCTCCTGTGCAGGCTCTGGATTCACCTTCAGTAGCTATGCTATGCACTGGGTTCGCCAGGCTCCAGGAAAAGGTCTGGAGTGGGTATCAGCTATTGGTACTGGTGGTGGCACATACTATGCAGACTCCGTGAAGGGCCGATTCACCATCTCCAGAGACAATGCCAAGAACTCCTTGTATCTTCAAATGAACAGCCTGAGAGCCGAGGACATGGCTGTGTATTACTGTG
IGH_NW_019937202.1	-	404582	404551	CACAGTG	CACAAACCT	IGHV3-11*01	+	94.4444	14	404589	AGGTGCAGCTGGTGGAGTCTGGGGGAGGCTTGGTACAGCCTGGGGGGTCCCTGAGACTCTCCTGTGCAGCCTCTGGATTCACCTTCAGTAACCACTACACGAGCTGGGTCCTCCAGGCTCCAGGGAAGGGACTGGAGTGGGTTTCATACATTAGTGGTGATCGTGGTTACACAAACTATGCAGACTCTGTGAAGGGCCGATTCACCATCTCCAGGGACAACGCCAAGAACTCACTGTATCTGCAAATGAACAGCCTGAGAGCCGAGGACACGGCTGTGTATTACTGTG

## Sheet: gorilla
contig	reference strand	heptamer index	nonamer index	heptamer	nonamer	best aligned human gene	alignment direction	alignment PI	longest common k-mer	start of gene	gene sequence
IGH_NC_044616.1	-	87323978	87323948	CACAGTG	CTAAAACCC	IGHV5-51*01	+	97.9239	16	87323985	GAGGTGCAGCTGGTGCAGTCTGCAGCAGAGGTGAAAAGGCCCGGGGAGTCTCTCAGGATCTCCTGCAAGGGTTCTGGATACAGCTTTACCAGCTACTGGATCGGCTGGGTGCGCCAGATGCCCGGGAAAGGCCTGGAGTGGATGGGGATCATCTATCCTGGTGACTCTGATACCAGATACAGCCCGTCCTTCCAAGGCCAGGTCACCATCTCAGCCGACAAGTCCATCAGCACCGCCTACCTGCAGTGGAGCAGCCTGAAGGCCTCAGACACCGCCATGTATTACTGTG
IGH_NC_044616.1	-	86733235	86733206	CACAGTG	GTCAGAAAC	IGHV1-3*01	+	97.9239	35	86733242	CAGGTCCAGCTGGTGCAGTCTGGGGCTGAGGTGAAGAAGCCTGGGGCCTCAGTGAAGGTTTCCTGCAAGGCTTCTGGATACACCTTCACTGGCTATGCTATGCATTGGGTGCGCCAGGCCCCTGGACAAAGGCTTGAGTGGATGGGATGGATCAACACTGGCAATGGTAACACAAAATATTCACAGAAGTTCCAGGGCAGAGTCACCATTACCAGGGACACATCCGCGAGCACAGCCTACATGGAGCTGAGCAGCCTGAGATCTGAGGACACGGCTGTATATTACTGTG
IGH_NC_044616.1	-	87421261	87421232	CACAGTG	GACACAAAC	IGHV3-53*01	+	94.4637	18	87421268	GAGGTGCAGCTGGTGGAGTCTGGAGGAGGCTTGGTCCAGCCTGGGGGGTCCCTGAGACTCTCCTGTGCAGCCTCTGGATTCACCTTCAGTAGCTACCACATGAGCTGGGTCCGCCAGGCTCCAGGGAAGGGTCTGGAGTGGGTCTCAGTTATTTATAGTGATGGCAGTAGCACATACTACGCAGCCTCCGTGAAGGGCAGATTCACCATCTCCAGAGACAATTCCAAGAACACGCTGTATCTTCAAATGAACAGCCTGAGAGCTGAGGACTCGGCCGTGTATTACTGTG
IGH_NC_044616.1	-	87254797	87254768	CACAGTG	GTCAGAAAC	IGHV1-46*01	+	99.654	43	87254804	CAGGTGCAGCTGGTGCAGTCTGGGGCTGAGGTGAAGAAGCCTGGGGCCTCAGTGAAGGTTTCCTGCAAGGCGTCTGGATACACCTTCACCAGCTACTATATGCACTGGGTGCGACAGGCCCCTGGACAAGGGCTTGAGTGGATGGGAATAATCAACCCTAGTGGTGGTAGCACAAGCTACGCACAGAAGTTCCAGGGCAGAGTCACCATGACCAGGGACACGTCCACGAGCACAGTCTACATGGAGCTGAGCAGCCTGAGATCTGAGGACACGGCCGTGTATTACTGTG
IGH_NC_044616.1	-	87352673	87352644	CACAGTG	GACACAAAC	IGHV4-55*01	+	98.2699	22	87352680	CAGGTGCAGCTGCAGGAGTCGGGCCCAGGACTGGTGAAGCCTTCGGAGACCCTGTCCCTCACCTGCGCTGTCTCTGGTGACTCCATCAGCAGTGGTAACTGGTGGATCTGGGTCCGCCAGCCCCCAGGGAAGGGGCTGGAGTGGATTGGGGAAATCAATCATAGTGGGAGCACCTACTACAACCCGTCCCTCAAGAGTCGAATCACCATGTCAGTAGACACGTCCAAGAACCAGTTCTCCCTGAAGCTGAGCTCTGTGACCGCCGCGGACACGGCCGTGTATTACTGTG
IGH_NC_044616.1	-	87385324	87385295	CACAGTG	GACACAAAC	IGHV4-30-4*02	+	95.5479	22	87385331	CAGGTGCAGCTGCAGGAGTCGGGCCCAGGACTGGTGAAGCCTTCACAGACCCTGTCCCTCACCTGCACTGTCTCTGGTGGCTCCATCAGCAGTAGTGATTACTACTGGAGCTGGATCCGGCAGCCCGCCGGGAAGGGACTGGAGTGGATTGGGCGTATCTATACCAGTGGGAGCACCAACTACAACCCCTCCCTCAAGAGTCGAGTCACCATATCAGTAGACACGTCCAAGAACCAGTTCTCCCTGAAGCTGAGCTCTGTGACCGCCGCGGACACGGCCGTGTATTACTGTG
IGH_NC_044616.1	-	87024744	87024715	CACAGTG	GACACAAAC	IGHV3-30*01	+	96.1938	22	87024751	CAGGTGCAGCTGGTGGAATCTGCGGGAGGCGTGGTACAGCCTGGGAGGTCCCTGACACTCTCCTGTACAGCCTCTGGATTCACCTTCAGTAGCTATGGCATGCACTGGGTCCGCCAGGCTCCAGGCAAGGGGCTGGAGTGGGTGGCAGTTATATCGTATGATGCAAGTAATAAATACTACGCAGCCTCCGTGAAGGGCCGATTCACCATCTCCAGAGACAATTCCAAGAACACGCTGTATCTTCAAATGAACAGCCTGAGAGCTGAGGACACGGCCGTGTATTACTGTG
IGH_NC_044616.1	-	86957893	86957864	CACAGTG	GACACAAAC	IGHV3-23*01	+	95.5017	11	86957900	GAGGTGCAGCTGGTGGAGTCTGGGGGAGGCTTGGTACAGCCTGGGGGGTCCCTGAGACTCTCCTGTGTAGCCTCTGGATTCACCTTTAGCAGCTATGCCATGAGCTGGGTCCGCCAGGCTCCAGGCAAGGGGCTGGAGTGGGTCTCAACTATTAGTAGTACTGGTGGTAGCACGTGGTACCCAGGCTCTGTCAAGGGCCGATTCACCATCTCCAGAGACAATTCCAAGAACACGCTGTATCTGCAAATGAACAGCCTGAGAGCCGAGGACACGGCCGTATATTACTGTG
IGH_NC_044616.1	-	87187043	87187014	CACAGTG	GACACAAAC	IGHV3-41*02	+	94.4251	10	87187050	GAGGTGCAGCTGGTGGAGTCTGGGGGAGGCTTGGTACAGCCTGAGGGTTCTCTAAAACTCTCTTGTGCAGCCTCAGGATTCACCTTTAGTAGCTATGCCATGGACTGGGTCCGCCAGGCTCCAGGCAAGGGGCTGGAGTGGGTGGCACATATATGGAATGATGGAAGTCAGAAATACTATGCAGACTCTGTGAAGGGCCGATTCACAATCTCCAGAGACAATTCTAAGAGCATGCTCTATCTGCAAATGGACAGTCTGAAAGCTGAGGACACGGCCATGTATTACTG
IGH_NC_044616.1	-	86924195	86924166	CACAGTG	GACACAAAC	IGHV3-21*01	+	96.1938	22	86924202	GACGTGCAGCTGGTGGAGTCTGGGGGAGGCTTGGTCCAGCCTGGGGGGTCCCTGAGACTCTCCTGTGCAGCCTCTGGATTCACCTTTAGTAGCTATTGGATGAGCTGGGTCCGCCAGGCTCCAGGGAAGGGGCTGGAGTGGGTTTCATACATTAGTAGTAGTAGTAGTTACATATACTACGCGGACTCAGTGAAGGGCCGATTCACCATCTCCAGAGACAACGCCAAGAACTCACTGTATCTGCAAATGAACAGCCTGAGAGCCGAGGACACGGCCGTGTATTACTGTG
IGH_NC_044616.1	-	87086846	87086817	CACAGTG	GACACAAAC	IGHV4-34*01	+	95.8042	22	87086853	CAGGTGCAGCTACAGCAGTGGGGCGCAGGAGTGGTGAAGCCTTCGGAGACCCTGTCCCTCACCTGCGCTGTCTATGGTGGGTCCTTCAGTGGTTACTACTGGAACTGGATCCGCCAGCCCCCAGGGAAGGGCCTGGAGTGGATTGGGCATATCAGTTATGATGGGAGCACCAACTACAACCCGTCCCTCAAGAGTCGAGTCACCATATCAGTAGACACGTCCAAGAACCAGTTCTCCCTGAAGCTGAGCTCTGTGACCGCCGCGGACACGGCCGTGTATTACTGTG
IGH_NC_044616.1	-	87250685	87250654	CACAGTG	CAGAAACCC	IGHV1-45*01	+	97.5779	26	87250692	CAGATGCAGCTGGTGCAGTCTGGGGCTGAGGTGAAGAAGACTGGGGCCTCAGTGAAGGTTTCCTGCAAGGCTTCCGGATACACCTTCACCTACCGCTCCCTGCACTGGGTGCGACAGGCCCCTGGACAAGCGCTTGAGTGGATGGGATGGATCACACCTTACAATGGTAACACCAACTATGCACAGAAGTTCCAGGACAGAGTCACCATTACCAGGGACAGGTCTATGAGCACAGCCTACATGGAGCTGAGCAGCCTGAGATCTGAGGACACAGCCGTGTATTACTGTG
IGH_NC_044616.1	-	86758891	86758862	CACAGTG	GACACAAAC	IGHV4-34*01	+	69.2833	22	86758898	CATACCAAGTTCATCAGTTCCCTGAAGGTTAGGGCAGGTCCTTTTGCATCTGTTCAATCAAAAGGCCCAGACACCAGCTGGTGAGGAGCTTGCCTGCTTCTGGGTATTGGATCTGTCTCTTCCCCTTTGCTTATAGATGGGTACATCTATGGGAGCACCAACTACAATCCGTCCCTCAAGAGTCGAGTCACCATGTCAGTAGACACGTCCAAGAACCAGTTCTCCGTGAAGCTGAGCTCTGTGACCGCCGCGGACACGGCCGTGTATTACTGTG
IGH_NC_044616.1	-	87152082	87152053	CACAGTG	GTCAGAAAC	IGHV7-40*03	+	96.2457	38	87152089	TTTTCAATAGAAAAGTCAAATAATCTATCTAAGTGTCAATCAGTGGATGATTAGATAAAATATGATATATGTAAATCATGGAATACTATGCAGCCAGTATGGTATGAATTCAGTGTGACCGGCCCCTGGACAAGGGCTTGAGTGGATGGGATGGATCATCACCTACACTGGGAACCCAACGTATACCCACGGCTTCATAGAACGGTTTGTCTTCTCCATGGACACCTCTGTCAGCATGGCGTATCTGCAGATCAGCAGCCTAAAGGCTGAGGACACGGCCGTGTATGACTGTA
IGH_NC_044616.1	-	87510030	87510001	CACAGTG	GACAAAAAC	IGHV3-74*01	+	97.5779	13	87510037	GAGGTGCAGCTGTTGGAGTCTGGGGGAGGCTTAGTACAGCCTGGGGGGTCCCTGAGGCTCTCCTGTGCAGCCTCTGGATTCACCTTCAGTAGCTACTGGATGCACTGGGTCCGCCAGGCTCCAGGGAAGGGGCTGGAGTGGGTCTCACGTATTAATAGTGATGGGAGTAGCACAAGCTACGCGGACTCCGTGAAGGGCCGATTCACCATCTCCAGAGACAACGCCAAGAACACGCTGTATCTGCAAATGAACAGCCTGAGAGCCGAGGACACGGCTGTGTATTACTGTG
IGH_NC_044616.1	-	87214092	87214063	CACAGTG	GACAAAAAC	IGHV3-43*01	+	96.5636	13	87214099	GAAGTGCAGCTGGTGGAGTCTGGGGGAGGCGTGGTACAGCCTGGGAGGTCCCTGAGACTCTCCTGTGCAGCCTCTGGATTCACCTTTGATGATTATGCCATGCACTGGGTCCGTCAAGCTCCAGGGAAGGGTCTGGAGTGGGTCTCTCGTATTAGTTGGGGTGGTGGTAGCACATACTATGCAGATTCTGTGAAGGGCCTATTCACCATCTCCAGAGACAACAGCAAAATCTCCCTGTATCTGCAAATGAACAGTCTGAGAGCTGAGGACACCGCCTTGTATTACTGTGCA
IGH_NC_044616.1	-	87148433	87148404	CACAGTG	GACAAAAAC	IGHV4-38-2*01	+	97.6027	22	87148440	CAGCTGCAGCTGCAGGAGTCGGGCCCAGGACTGGTGAAGCCTTCACAGACCCTGTCCCTCACCTGCACTGTCTCTGGTGGCTCCATCAGCAGTGGTAGTTACTACTGGAGCTGGATCCGCCAGCCCCCAGGGAAGGGGCTGGAGTGGATTGGGAGTATCTATTATAGTGGGGGCACCTACTACAACCCGTCCCTCAAGAGTCGAGTCACCATATCAGTAGACACGTCCAAGAACCAGTTCTCCCTGAAGCTGAGCTCTGTGACCGCCGCAGACACGGCCGTGTATTACTGTG
IGH_NC_044616.1	-	86852768	86852739	CACAGTG	GACACAAAC	IGHV3-13*01	+	96.8531	13	86852775	GAGGTGCAGCTGGTGGAGTCTGAGGGAGGCTTGGTACAGCCTGGGGGGTCCCTGAGACTCTCCTGTGCAGCCTCTGGATTCACCTTCAGTAGCTACAACATGCACTGGGTCCGCCAGGCTCCAGGGAAAGGTCTGGAGTGGGTCTCAGCTATTGGTACTGGTGGTGACACATACTATCCAGGCTCCGTGAAGGGCCGATTCACCATCTCCAGAGAAAATGCCAAGAACTCCTTGTATCTTCAAATGAACAGCCTAAGAGCCGAGGACACGGCTGTGTATTACTGTG
IGH_NC_044616.1	-	87048988	87048959	CACAGTG	GACACAAAC	IGHV3-30*01	+	95.8478	22	87048995	CAGGTGCAGCTGGTGGAATCTGTGGGAGGCGTGGTACAGCCTGGGAGGTCCCTGACACTCTCCTGTGCAGCCTCTGGATTCACCTTCAGTAACTATGGCATGCACTGGGTCCGCCAGGCTCCAGGGAAGGGGCTGGAGTGGGTGGCAGTTATCTGGAATGATGGAAGTAATAAATACTATGCAGACTCCGTGAAGGGCCGATTCACCATCTCCAGAGACAATTCCAAGAACACGCTGTATCTTCAAATGAACAGCCTGAGAGCTGAGGACACGGCCGTGTATTACTGTG
IGH_NC_044616.1	-	87473877	87473848	CACAGTG	GACACAAAC	IGHV3-22*01	+	96.9492	21	87473884	GAGGTGCAGCTGGTGGAGTCTGGGGGAGGCTTGGTACAGCCTGGGGGGTCCCTGAGACTCTCCTGTGCAGCCTCTGGATTCACATTCAGTAACTACTACAAGAGCTGGGTCTGCCAGGCTCCAGGGAAGGGGCTGGAATGGGTACGTTTCATTAGAAACAAAGCTAATGGTGGGACAACAGAATACACCACGTCTGTGAAAGGCAGATTCACAATCTCAAGAGATGATTCCAAAAGCATCACCTATCTGCAAATGAACAGCCTGAAAACCGAGGACACGGCCGTGTATTACTGTT
IGH_NC_044616.1	-	86752935	86752906	CACAGTG	GTCAAAAAC	IGHV7-4-1*01	+	95.8478	52	86752942	CAGGTGCAGCTGGTGCAATCTGGGTCTGAGGTGAAGAAGCCTGGGGCCTCAGTGAAGGTCTCCTGCAAGGCTTCTGGATACACCTTCACTAGCTATGGTATGAATTGGGTGCGACAGGCCCCTGGACAAGGGCTTGAGTGGATGGGATGGATCAACACCTACACTGGGAACCCAACATACGCCCAGGGCTTCACAGGACGGTTTGTCTTCTCCATGGACACCTCTGTCAGCACAGCATATCTGCAGATCAGCAGCCTAAAGGCTGAGGATACGGCCATGTATTACTGTG
IGH_NC_044616.1	-	86785632	86785603	CACAGTG	GACACAAAC	IGHV3-7*01	+	97.2318	22	86785639	GACGTGCAGCTGGTGCAGTCTGGGGGAGGCTTGGTCCAGCCTGGGGGGTCCCTGAGACTCTCCTGTGCAGCCTCTGGATTCACCTTTAGTAGCTACTGGATGCACTGGGTCCGCCAGACTCCAGGGAAGGGGCTGGAGTGGGTGGCCAACATAAAGAAAGATGGAAGTGGGAAATACTATGTGGACTCTGTGAAGGGCCGATTCACCATCTCCAGAGACAACGCCAAGAACTCACTGTATCTGCAAATGAACAGCCTGAGAGCCGAGGACACGGCCGTGTATTACTGTG
IGH_NC_044616.1	-	87571680	87571651	CACAGTG	GACACAAAC	IGHV4-28*01	+	94.1176	22	87571687	CAGGTGCAGCTGCAGGAGTGGGGCCCAGGACTGGTGAAGCCTTCGGAGGCCCTGTCCCTCACCTGCGCTGTCTCTGGTGACTCCATCAGCAGTGGTAACTGGTGGAGCTGGGTCCGCCAGTCCCCAGGGAAGGGGCTGGAATGGATTGGATACATCTATTATAGTGGGAGGAGCTACTACAACCCATCCCTCAAGAGTCGAGTCACCATGTCAGTAGACACGTCCAAGAACCAGTTCTCCCTGAAGCTGAGCTCTGTGACCGCCGCGGACACGGCCGTGTATTACTGTG
IGH_NC_044616.1	-	86946955	86946926	CACAGTG	GACACAAAC	IGHV3-22*01	+	93.8776	21	86946962	GAGGTGCAGCTGGTGGAGTCTGGGGGAGGCTTGGTAAAGCCTGGGGGATCCCTGAGACTCTCCTGTGCAGCCTCTGGATTCACCTTCAGTAACTACTACATGGAGTGGGTTCGCCAGGCTCCAGGGAAGGGGCTGGAGTGGGTAGGTTTCATTAGAACCAAAGCTAAAGGTGGGACAACAGAATACGCCGCGTCTGTGAAAGGCAGATTCACCATCTCAAGAGATGATTCCAAAAGCATCGCCTATCTGCAAATGAACAGCCTGAAAACCGAGGACACGGCCGTGTATTACTGTA
IGH_NC_044616.1	-	87175561	87175532	CACAGTG	GTCAGAAAC	IGHV7-40*03	+	96.8858	28	87175568	TTTTCAATAGAAAAGTCAAATAATCTAAGTGTCAATCAGTGGATGATTAGATAAAATATGATATATGTAAATCATGGAATACTATGCAGCCAGTATGGTATGAATTCAGTGTGACCGGCCCCTGGACAAGGGCTTGAGTGGATGCGATGGATCATCACCTACACTGGGAACCCAACGTATACCCACGGCTTCATGGAACGGTTTGTCTTCTCCATGGACACCTCTGTCAGCATGGCGTATCTGCAGATCAGCAGCCTAAAGGCTGAGGACACGGCCGTGTATGACTGTA
IGH_NC_044616.1	-	87404037	87404008	CACAGTG	GACACAAAC	IGHV3-64*03	+	94.4637	22	87404044	GAGGTGCAGCTGGTGGAGTCTGGGGGAGGCTTGGTACAGCCTGGGGGGTCCCTAAGACTCTCCTGTGCAGCCTCTGGATTCACCTTCAGTAGCTATGCTATGCACTGGGTCCGCCAGGCTCCAGGGAAGGGTCTGGAGTGGGTCTCAGCTATTTATAGTGGTGGTAGCACATACTACGCAGACTCCGTGAAGGGCAGATTCACCATCTCCAGAGACAATTCCAAGAACACGCTGTATCTTCAAATGGGCAGCCTGAGAGCTGAGGACACGGCCGTGTATTACTGTG
IGH_NC_044616.1	-	87141870	87141839	CACAGTG	CAGAAAGCC	IGHV1-2*01	+	85.1211	26	87141877	CAGGTCCAGCTGGTGCAGTCTTGGGCTGAGGTGAGGAAGTCTGGGGCCTCAGTGAAAGTCTCCTGTAGTTTTTCTGGGTTTACCATCACCAGCTACAGTATACATTGGGTGCAACAGTCCCCTGGACAAGGGCTTGAGTGGATGTGATGGATCAACCCTGGCAATGGTAGCCCAAGCTATGCCAAGAAGTTTCAGGGCAGATTCACCATGACCAGGGACATGTCCACAACCACAGCCTACACGGAGCTGAGCAGCCTGAGATCTGAGGACATGGCTGTGTATTACTATG
IGH_NC_044616.1	-	87502300	87502271	CACAGTG	GACACAAAC	IGHV3-73*01	+	98.3051	19	87502307	GAGGTGCAGCTGGTGGAGTCTGGGGGAGGCTTGGTCCAGCCTGGGGGGTCCCTGAGACTCTCCTGTGCAGCCTCTGGGTTCACCTTCAGTGGCTCTGCTATGCACTGGGTCCGCCAGGCTTCCGGGAAAGGGCTAGAGTGGGTTGGCCGTATTAGAAGCAAAGCTAACAGTTACGCGACAGCATATGCTGCGTCGGTGAAAGGCAGGTTCACCATCTCCAGAGATGATTCCAAGAACACGGCGTATCTGCAAATGAACAGCCTGAAAACCGAGGGCACGGCCGTGTATTACTGTA
IGH_NC_044616.1	-	86977986	86977957	CACAGTG	GACACAAAC	IGHV3-25*01	+	98.2699	9	86977993	GAGATGCAGCTGGTGGAGTCTGGGGGAGGCTTGGCAAAGCCTGCGCGGTCCCCGAGACTCTCTTGTGCAGCCTCTCAATTCACCTTCAGTAGCTACTACATGAACTGTGTCCGCCAGGCTCCAGCGAATGGGCTGGAGTTGGTTGGACAAGTTAATCCTAATGGGGGTAGCACATACCTCACAGACTCCGGTAAGGACCGATTCAATACCTCCAGAGATAACGCCAAGAACACACTTCATCTGCAAATGAACAGCCTGAAAATCGAGGACACGGCCCTGTATTAGTGTA
IGH_NC_044616.1	-	86715649	86715620	CACAGTG	GTCAGAAAC	IGHV1-2*01	+	97.9167	50	86715656	CAGGTGCAGCTGGTGCAGTCTGGGGCTGAGGTGAAGAAGCCTGGGGCCTCAGTGAAGGTCTCCTGCAAGGCGTCTGGATACACCTTCACCGGCTACTATATGCACTGGGTGCGACAGGCCCCTGGACAAGGGCTTGAGTGGATGGGATGGATCAACCCTAACAGTGGTGGCACAAACTACGCACAGAAGTTTCAGGGCAGGGTCACCATGACCAGGGACACGTCCATCAGCACAGCCTACATGGAGCTGAGCAGGCTGAGATCTGAGGACACGGCCACGTATTACTGTA
IGH_NC_044616.1	-	87207096	87207065	CACAGTG	CACAAATCT	IGHV3-72*01	+	88.4746	10	87207103	GAGGCGCAGCTGGTAGAGTCTGGGGGAGGCTTGGTACAGCCTGGGTGGGTCCCTGAGACTCTCATTTGCAGCTTCTGGATTCACCTTCAGTGACTTCTGGATGCACTGGATCTGCCAGGCTTCTGGGAAAGGGCAGGAGTGGGTTGGCCGTATTAGAACCAAACGTAACAGTTACACGACAGAATGCGCTGCATCTGTGAAAGGCAGGTTCACCATCTCAAGAGATGATTCAAAGAACACACTGTATCTGCAAATGAATACCGTGAAAACCGAGGACACGGCCATCTATTACTGTA
IGH_NC_044616.1	-	87337897	87337868	CACAGTG	GACACAAAC	IGHV3-30*01	+	93.0796	22	87337904	AGGTGCAGCTGGTGGAGTCTGGGGGAGGCGTGGTCCAGCCTGGGAGGTCCCTGAGACTCTCCTGTGCAGCCTCTGGATTCACCTTCAGTAGCTACTGGATGCACTGGGTCCGCCAGGCTCCAGGGAAGGGTCTGGAGTGGGTCTCAGCTATTTATAGTGATGGCAGTAGCACATACTACGCAGCCTCCGTGAAGGGCAGATTCACCATCTCCAGAGACAATTCCGAGAACACGCTGTATCTGCAAATGAACAGCCTGAGAGCTGAGGACACGGCCGTGTATTACTGTG
IGH_NC_044616.1	-	86878151	86878122	CACAGTG	GACACAAAC	IGHV3-15*01	+	98.6441	21	86878158	GAGGTGCAGCTGGTGGAGTCTGGGGGAGGCTTGGTAAAGCCTGGGGGGTCCCTGAGACTCTCCTGTGCAGCCTCTGGATTCACTTTCAGTAACGCCTGGATGAACTGGGTCCGCCAGGCTCCAGGGAAGGGGCTGGAGTGGGTTGGCCGTATTAAAAGCAAAGCTGATGGTGGGACAACAGACTACGCTGCACCCGTGAAAGGCAGATTCACCATCTCAAGAGATGATTCAAAAAACACGCTGTATCTGCAAATGAACAGCCTGAAAACCGAGGACACGGCCGTGTATTACTGTA
IGH_NC_044616.1	-	87074328	87074299	CACAGTG	GACACAAAC	IGHV3-30*01	+	97.5694	22	87074335	AGGTGCAGCTGGTGGAGTCTGGGGGAGGCGTGGTCCAGCCTGGGAGGTCCCTGACACTCTCCTGTGTAGCCTCTGGATTCACCTTCAGTAGCTATGGCATGCACTGGGTCCGCCAGGCTCCAGGCAAGGGGCTGGAGTGGGTGGCAGTTATATGGAATGATGCAAGTAATAAATACTATGCAGACTCCGTGAAGGGCCGATTCACCATCTCCAGAGACAATTCCAAGAACACGCTGTATCTGCAAATGAACAGCCTGAGAGCTGAGGACACGGCCGTGTATTACTGTG
IGH_NC_044616.1	-	87368699	87368670	CACAGTG	GTCAGAAAC	IGHV1-58*01	+	94.8097	52	87368706	CAAGTGCAGCTGGTGCAGTCTGGGCCTGAGGTGAAGAAGCCTGGGGCCTCAGTGAAGGTCTCCTGCAAGGCTTCTGGATACACCTTTACTAGCTCTGCTATGCAGTGGGTGCGACAGGCCCCTGGACAAGGCCTTGAGTGGATAGGATGGATCATCGTTGGCAGTGGTAACACCAACTACGCACAGAAGTTCCAGGGCAGAGTCACCATTACCAGGGACACGTCCACGAGCACAGCCTACATGGAGCTGAGCAGCCTGAGATCCGAGGACATGGCTGTGTATTACTGTG
IGH_NC_044616.1	-	87171918	87171889	CACAGTG	GACAAAAAC	IGHV4-38-2*01	+	97.9452	22	87171925	CAGCTGCAGCTGCAGAGTCGGGCCCAGGACTGGTGAAGCCTTCGGAGACCCTGTCCCTCACCTGCACTGTCTCTGGTGGCTCCATCAGCAGTGGTAGTTACTACTGGAGCTGGATCCGCCAGCCCCCAGGGAAGGGGCTGGAGTGGATTGGGAGTATCTATTATAGTGGGGGCACCTACTACAACCCGTCCCTCAAGAGTCGAGTCACCATATCAGTAGACACGTCCAAGAACCAGTTCTCCCTGAAGCTGAGCTCTGTGACCGCCGCAGACACGGCCGTGTATTACTGTG
IGH_NC_044616.1	-	87302310	87302281	CACAGTG	GACACAAAC	IGHV3-49*01	+	96.9492	21	87302317	GAGGTGCAGCTGGTGGAGTCTGGGGGAGGCTTGGTCAAGCCTGGGGGGTCCCTGAGGCTCTCCTGTACAGCTTCTGGATTCACCTTTGGTGATTATACCATGAGCTGGGTCCGCCAGGCTCCAGGGAAGGGGCTGGAGTGGGTAGGTTTCATTAGAAGCAAAGCTTATGGTGGGACAACAGAATACGCCGCGTCTGTGAAAAGCAGATTCACCATCTCAAGAGATGATTCCAAAAGCATCGCCTATCTGCAAATGAACAGCCTGAAAACCGAGGACACGGCCGTGTATTACTGTA
IGH_NC_044616.1	-	87331592	87331563	CACAGTG	GACACAAAC	IGHV3-52*01	+	94.4637	16	87331599	GAGGTGTAGCTGGTGCAGTCTGGGTGAGGCTTGGTACAGCCTGGAGGGTCCCTGAGACTCTCCTTTGCAGCCTCTGGATTCACCTTCAGTAGCTCCTGGATGCACTGGGTCTGCCAGGCTCCGGAGAAGGGGCTGGAGTGGGTGGCCGACATAAAGTGTGTTGGAAGTGAGAAATACTATGCAGACTCTGTGAAGGGCTGATTGACCATCTCCAGAGACAACGCCAAGAACTCCTTGTATCTACAAATGAACAGCCTGAGAGCTGAGGACACAGCTGTGTATTACTGTG
IGH_NC_044616.1	-	86806753	86806723	CACAGTG	CAGAAACCC	IGHV1-2*01	+	93.0796	48	86806760	CAGGTGCAGCTGGTGCAGTCTGGGGCTGAGGTGAGGAAGCCTGGGTCCTCAGTGAAGGTCTCCTGCAAGGCTTCTGGATACACCTTCACCAGCTATGATATCAACTGGGTGCGACAGGCCCCTGGACAAGGGCTTGAGTGGATGGGATGGATGAACCCTAACAGTGGTAACACAGGCTATGCACAGAAGTTCCAGGGCAGAGTCACCATGACCAGGAACACGTCCACGAGCACAGCCTACATGGAGCTGAGCAGCCTGAGATCTGAGGACACGGCCGTGTATTACTGTG
IGH_NC_044616.1	-	87527171	87527142	CACAGTG	GTCACAAAC	IGHV3-48*01	+	83.2753	11	87527178	GAAGTGTAGCTGGTAGAGTCTGGGGGAGACTTGGTACAGCCTGGGGGGTCCATGTGACTCTCCTGTGTAGCCTCTGGATACACCTTCAGTAGCTATGGCATGCACTAGGTGGACCAAGCTCCAGGGAAGGGACTGAAGTGAGTCTTACATTAATGCTAGTGGTGGAGGCACATACTACTCAGACTCTGTGAAGGGCCGATTCACCATCTCCAGAGAAAACACCAAGAACTCACAGTATCTACAAATAAACAGTTTGATTGCTGACACCATGGCTGTCTATTACTG
IGH_NC_044616.1	-	86838648	86838619	CACAGTG	GACACAAAC	IGHV3-21*01	+	96.5398	13	86838655	GAGGTGCAGCTGGTGGAGTCTGGGGGAGGCTTGGTCAAGCCTGGAGGGTCCCTGAGACTCTCCTGTGCAGCCTCTGGATTCACCTTCAGTAGCTATGGCATGAGCTGGGTCCGCCAGGCTCCAGGGAAGGGGCTGGAGTGGGTTTCATACATTAGTAGTAGTAGTAGTACCATATACTACGCGGACTCAGTGAAGGGCCGATTCACCATCTCCAGAGACAACGCCAAGAACTCATTGTATCTGCAAATGAACAGCCTGAGAGCCGAGGACACGGCTGTGTATTACTGTG
IGH_NC_044616.1	-	86740056	86740027	CACAGTG	GACACAAAC	IGHV4-28*01	+	96.1938	22	86740063	CAGGTGCAGCTGCAGGAGTCGGGCCCAGGACTGGTGAAGCCTTCGGAGACCCTGTCCCTCATCTGCGCTGTCTCTGGTGGCTCCATCAGCAGTAGTAACTGGTGGATCTGGGTCCGCCAGTCCCCAGGGAAGGGACTGGAGTGGATTGGGTACATCTATTATAGTGGGAGCACCTACTACAACCCGTCCCTCAAGAGTCGAGTCACCATGTCAGTAGACACGTCCAAGAACCAGTTCTCCCTGAAGCTGAGCTCTGTGACCGCCGCGGACACGGCCGTGTATTACTGTG
IGH_NC_044616.1	-	87460241	87460212	CACAGTG	GTCAGAAAC	IGHV1-69*01	+	97.9239	49	87460248	CAGGTCCAGCTGGTGCAGTCCGGGGCTGAGGTGAAGAAGCCTGGGTCCTCAGTGAAGGTCTCCTGCAAGCTTTCTGGAGGCACCTTCAGCAGCTATGCTATCAGCTGGGTGCGACAGGCCCCTGGACAAGGGCTTGAGTGGATGGGAGGGATCATCCCTATCCTTGGTACAGCAAACTACGCACAGAAGTTCCAGGGCAGAGTCACGATTACCGCGGACGAATCCACGAGCACAGCCTACATGGAGCTGAGCAGCCTGAGATCTGAGGACACGGCCGTGTATTACTGTG
IGH_NC_044616.1	-	87426984	87426953	CACAGTG	CAGTAACCC	IGHV1-46*01	+	89.6194	35	87426991	CAGGTGCAGCTGGCGCAGTCTGGGGATGAGATGAAGAAGGCTGGGGCATCAGTGAAAGCCTCCTGCAAGACTTGTGGATACACCTTCACCAGTTACTCTATGCACTAGGTGCGTCATGCCCATGCACAAGGGCTTGAGTGGATGGGAAGGATGTGCCCTAGTGATGGCAGCACAAGCTACGCAGAGAAGTTCCAGGGCAGAGTCACCATGACCAGGGACACATCCACGAGCACAGCCTACATGGAGCTGAGCAGCCTGAGATCTGAAGACACGGCCATGTATTACTGTG
IGH_NC_044616.1	-	87000484	87000455	CACAGTG	GACACAAAC	IGHV3-30*01	+	97.2318	22	87000491	CAGGTGCAGCTGGTGGAATCTGCGGGAGGCGTGGTACAGCCTGGGAGGTCCCTGACACTCTCCTGTACAGCCTCTGGATTCACCTTCAGTAGCTATGGCATGCACTGGGTCCGCCAGGCTCCAGGCAAGGGGCTGGAGTGGGTGGCAGTTATATCGTATGATGCAAGTAATAAATACTATGCAGACTCCGTGAAGGGCCGATTCACCATCTCCAGAGACAATTCCAAGAACACGCTGTATCTGCAAATGAACAGCCTGAGAGCTGAGGACACGGCCGTGTATTACTGTG
IGH_NC_044616.1	-	86868998	86868967	CACAGTG	CAGAAAGCC	IGHV1-46*01	+	78.5467	29	86869005	CTCACCCAGCTTCTGATGACTCTCCTGTTGCTAGCATCCATGGCCTCAGTGAAGGTGTCCCGCAAAGCTCTGGACACACCTTCGCCAGCCACGATATTCACTGTGTGCGACAGGCCCCTGCATAAGGGTTTGAATCGATGGTAGGGATCTACTCTGGCAATGGTAACACAGGCTATGCACAGAACTTTCAGGGCAGAGTCACCATGACCAGGGACATGTCCACGAGCACAGCCTACATGGAGCTGAGCAGTCAGAGATCTGAGGACATAGATGTGTATTACTGTG
IGH_NC_044616.1	-	87163605	87163576	CACAGTG	GACACAAAC	IGHV3-41*02	+	94.5017	10	87163612	GAGGTGCGCTGGTGGAGTCTGGGGAGGCTTGGTAAAGCCTGGGGGATCCCTGAGACTCTCCTGTGCAGCCTCAGGATTCTCCTTTAGTAGCTATGCCATGGACTGGGTCCGCCAGGCTCCAGGCAAGGGGCTGGAGTGAGTGGCACATATATGGAATGATGGAAAGTCAGAAATACTATGCAGACTCTGTGAAGGGCCGATTCACAATCTCCAGAGACCAATTCTAAGAGCATGCTCTATCTGCAAATGGACAGTCTGAAAGCTGAGGACACGGCCATGTATTATCTAG
IGH_NC_044616.1	-	86671045	86671016	CACAGTG	GACACAAAC	IGHV6-1*01	+	98.9933	13	86671052	CAGGTACAGCTGCAGCAGTCAGGTCCAGGACTGGTGAAGCCCTCGCAGACCCTCTCACTCACCTGTGCCATCTCTGGGGACAGTGTCTCTAGCAGCAGTGCTGCTTGGAACTGGATCAGGCAGTCCCCATCGAGAGGCCTTGAGTGGCTGGGAAGGACATACTACAGGTCCAAGTGGTATAATGATTATGCAGTATCTGTGCAAAGTCGAATAACCATCAACCCAGACACATCCAAGAACCAGTTCTCCCTGCAGCTGAACTCTGTGACTCCCGAGGACACGGCTGTGTATTACTGTG
IGH_NC_044616.1	-	86965815	86965786	CACAGTG	GTCAGAAAC	IGHV1-24*01	+	97.9167	46	86965822	AGGTCCAGCTGGTACAGTCCGGGGCTGAGGTGAAGAAGCCTGGGGCCTCAGTGAAGGTCTCCTGCAAGGTTTCCGGATACACCCTCACCGAATTATCCATGCACTGGGTGCGACAGGCTCCTGGAAAAGGGCTTGAGTGGATGGGAGGTTTTGATCCTGAAGATGGTGAAACAATATACGCACAGAATTCCAGGGCAGAGTCACCATGACCGAGGACACATCTACAGACACAGCCTACATGGAGCTGAGCAGCCTGAGACCTGAGGACATGGCCGTGTATTACTGTG
IGH_NC_044616.1	-	87489404	87489375	CACAGTG	GACACAAAC	IGHV3-72*01	+	97.9592	21	87489411	GAGGTGCAGCTGCTGGAGTCTGGGGGAGGCTTGGTACAGCCTGGGGGGTCCCTGAGACTCTCCTGTGCAGCCTCTGGATTCACCTTCAGTGACCACTACATGGACTGGGTCCGCCAGGCTCCAGGGAAGGGGCCGGAGTGGGTTGGCCGTATTAGAAACAAAGCTAACAGTTACACTACAGAATACGCCGCGTCTGTGAAAGGCAGATTCACCATCTCAAGAGATGATTCAAAGAACTCACTGTATCTGCAAATGAACAGCCTGAAAACCGAGGACACGGCCGTGTATTACTGTA
IGH_NC_044616.1	-	86899347	86899318	CACAGTG	GACACAAAC	IGHV3-20*01	+	93.7716	12	86899354	GAAGTGCAGCTGGTGGAGTCTGGAGGAGGCTTGGTACAGCCTGGGGGGTCCCTGAGACTCTCCTGTGCAGCCTCTGGATTCACCTTCAGTGACTACTACATGAGCTGGGTCCGCCAAGCTCCAGGGAAGGGTCTGGAGTGGGTCTCTGGTATTAATTGGAATGGTGGTAGCACAGGTTATGCAGACTCCGTGAAGGGCCGATTCACCATCTCCAGAAACAACGCCAAGAACTCCCTGTATCTGCAAATGAACAGTCTGAGAGCTGAGGACACGGCCTTGTATTACTGTG
IGH_NW_022149674.1	-	115984	115953	CACAGTG	CACAAACCT	IGHV3-11*01	+	94.0972	13	115991	AGGTGCAGCTGGTGGAGTCTGGGGGAGGCTTGGTACAGCCTGGGGGGTCCCTGAGACTCTCCTGTGCAGCCTCTGGATTCACCTTCAGTAACCATTACACGAGCTGGGTCCTCCAGGCTCCAGGGAAGGGACTGGAGTGGGTTTCATACATTAGTGGCGATAGTGATTACACAAACTACGCAGACTCTGTGAAGGGCCGATTCACCATCTCCAGGGACAACGCCAAGAACTCACTGTATCTGCAAATGAACAGCCTGAGAGCCGAGGACACGGCTGTGTATTACTGTG
IGH_NW_022149674.1	-	130043	130014	CACAGTG	GACACAAAC	IGHV3-13*01	+	95.8042	13	130050	GAGGTGCAGCTGGTGGAGTCTGAGGGAGGCTTGGTACAGCCTGGGGGTCCCTGAGACTCTCCTGTGCAGCCTCTGGATTCACCTTCAGTAGCTCAACATGCACTGGGTCCGCCAGGCTCCAGGGAAAGGTCTGGAGTGGGTCTCAGCTATTGGTACTGGTGGTGACACATACTATCCAGGCTCCGTGAAGGGCCGATTCACCATCTCCAGAGAAAATGCCAAGAACTCCTTGTATCTTCAAATGAACAGCTAAGAGCCGAGGACACGGCTGTGTATTACTGTG
IGH_NW_022150185.1	-	50873	50844	CACAGTG	GTCAGAAAC	IGHV7-40*03	+	96.8858	28	50880	TTTTCAATAGAAAAGTCAAATAATCTAAGTGTCAATCAGTGGATGATTAGATAAAATATGATATATGTAAATCATGGAATACTATGCAGCCAGTATGGTATGAATTCAGTGTGACCGGCCCCTGGACAAGGGCTTGAGTGGATGCGATGGATCATCACCTACACTGGGAACCCAACGTATACCCACGGCTTCATGGAACGGTTTGTCTTCTCCATGGACACCTCTGTCAGCATGGCGTATCTGCAGATCAGCAGCCTAAAGGCTGAGGACACGGCCGTGTATGACTGTA
IGH_NW_022150185.1	-	47225	47196	CACAGTG	GACAAAAAC	IGHV4-38-2*01	+	98.2877	22	47232	CAGCTGCAGCTGCAGGAGTCGGGCCCAGGACTGGTGAAGCCTTCGGAGACCCTGTCCCTCACCTGCACTGTCTCTGGTGGCTCCATCAGCAGTGGTAGTTACTACTGGAGCTGGATCCGCCAGCCCCCAGGGAAGGGGCTGGAGTGGATTGGGAGTATCTATTATAGTGGGGGCACCTACTACAACCCGTCCCTCAAGAGTCGAGTCACCATATCAGTAGACACGTCCAAGAACCAGTTCTCCCTGAAGCTGAGCTCTGTGACCGCCGCAGACACGGCCGTGTATTACTGTG
IGH_NW_022150185.1	-	800	771	CACAGTG	GACAAAAAC	IGHV3-43*01	+	96.2199	13	807	GAAGTGCAGCTGGTGGAGTCTGGGGGAGGCGTGGTACAGCCTGGGAGGTCCCTGAGACTCTCCTGTGCAGCGTCTGGATTCACCTTTGATGATTATGCCATGCACTGGGTCTGTCAAGCTCCAGGGAAGGGTCTGGAGTGGGTCTCTCGTATTAGTTGGGGTGGTGGTAGCACATACTATGCAGATTCTGTGAAGGGCCGATTCACCATCTCCAGAGACAACAGCAAAATCTCCCTGTATCTGCAAATGAACAGTCTGAGAGCTGAGGACACCGCCTTGTATTACTGTGCA
IGH_NW_022150185.1	-	40673	40642	CACAGTG	CAGAAAGCC	IGHV1-2*01	+	84.7751	26	40680	CAGGTCCAGCTGGTGCAGTCTTGGGCTGAGGTGAGGAAGTCTGGGGCCTCAGTGAAAGTCTCCTGTAGTTTTTCTGGGTTTACCATCACCAGCTACGGTATACATTGGGTGCAACAGTCCCCTGGACAAGGGCTTGAGTGGATGCGATGGATCAACCCTGGCAATGGTAGCCCAAGCTATGCCAAGAAGTTTCAGGGCAGATTCACCATGACCAGGGACATGTCCACAACCACAGCCTACACAGAGCTGAGCAGCCTGAGATCTGAGGACATGGCTGTGTATTACTATG
IGH_NW_022150185.1	-	62368	62339	CACAGTG	GACACAAAC	IGHV3-41*02	+	94.0767	10	62375	GAGGTGCAGCTGGTGGAGTCTGGGGGAGGCTTGGTACAGCCTGAGGGTTCTCTAAAACTCTCTTGTGCAGCCTCAGGATTCACCTTTAGTAGCTATGCCATGGACTGGGTCCGCCAGGCTCCAGGCAAGGGGCTGGAGTGGGTGGCACATATATGGAATGATGGAAGTCAGAAATACTATGCAGACTCTGTGAAGGGCCGATTCACAATCTCCAGAGACAATTCTAAGAGCATGCTCTATCTGCAAATGGACAGTCTGAAAGCTGAGGACACGGCATGTATTACTG
IGH_NW_022150755.1	-	10936	10907	CACAGTG	GTCAGAAAC	IGHV1-18*01	+	94.6996	51	10943	CAGGTGCAGCTGGTGCAGTCTGGAGCTGAGGTGAAGAAGCCTGGAGCCTCAGTGAAGGTCTCCTGCAAGGCTTCTGGTTACACCTTTACCAGCTACTATATGCACTGGGTGTGACAGGCCCCTGGACAAGGGCTTGAGTGGATGGGATGGATCAACACTTACAATGGTAACACAAACTACGCACAGAAGCTCCAGGGCAGAGTCACCATGACCAGAGACACATCCACGAGCACAGCCTACATGGAGCTGAGCAGCCTGAGATCTGACAACATGGCCGTGTATT
IGH_NW_022150755.1	-	25825	25796	CACAGTG	GACACAAAC	IGHV3-72*01	+	89.8305	17	25832	GAGGTGCAGCTGGTGGAGTCTGGGGGAGGCTTGGTCCAGCCTGAGGGGTCTCTGAGACTCTCATGTGCAGCCTCTGGATTCACCTTCAGTGACCACTACAGGAGCTGGGTCCGCCAGGCTCAAGGGAAAGGGTTAGAGTTGGTAGGTTTAATAAGAAACAAAGCTAACAGTTACACGACAGAATATGCTGCGTCTGGGAAAGGCAGATTTACCATCTCAAGAGGTGATTCAAAGAACACGCTGTATCTGCAAATGAGCAGCCTGAAAACCGAGGACTTGGCCGTGTATTACTGTG
IGH_NW_022151210.1	-	41312	41283	CACAGTG	GACACAAAC	IGHV3-13*01	+	91.6376	14	41319	GAGGTTCACCTGGTGCAGTCTGGGGAGGCTTGGTACAGCCTGGGGGTCCCTGAGACTCTCCTGTGCAGGCTCTGGATTCACCTTCAGTAGCCATGCTATGCACTGGGTTCGCCAGGCTCCAGGAAAAGGTCTGGAGTGGGTATCAGCTATTGGTACTGGTGGTGGCACATACTATGCAGACTCCGTGAAGGGCCGATTCACCATCTCCCAGAGACAATGCCAAGAACTCCTTGTATCTTCAAATGAACAGCCTGAGAGCGGAGGACATGGCTGTGTATTACTGTG
IGH_NW_022151273.1	-	20352	20323	CACAGTG	GACACAAAC	IGHV3-13*01	+	92.6573	14	20359	GAGGTTCACCTGGTGCAGTCTGGGGGAGGCTTGGTACAGCCTGGGGGGTCCCTGAGACTCTCCTGTGCAGGCTCTGGATTCACCTTCAGTAGCCATGCTATGCACTGGGTTCGCCAGGCTCCAGGAAAAGGTCTGGAGTGGGTATCAGCTATTGGTACTGGTGGTGGCACATACTATGCAGACTCCGTGAAGGGCCGATTCACCATCTCCAGAGACAATGCCAAGAACTCCTTGTATCTTCAAATGAACAGCCTGAGAGCGGAGGACATGGCTGTGTATTACTGTG
IGH_NW_022151308.1	-	39299	39270	CACAGTG	GACACAAAC	IGHV3-13*01	+	91.9298	14	39306	AGGTTCACCTGGTGCAGTCTGGGGAGGCTTGGTACAGCCTGGGGGTCCCTGAGACTCTCCTGTGCAGGCTCTGGATTCACCTTCAGTAGCCATGCTATGCACTGGGTTCGCCAGGCTCCAGGAAAAGGTCTGGAGTGGGTATCACTATTGGTACTGGTGGTGACACATACTATGCAGACTCCGTGAAGGGCCGATTCACCATCTCCAGAGACAATGCCAAGAACTCCTTGTATCTTCAAATGAACAGCCTGAGAGCGGAGACATGGCTGTGTATTACTGTG
IGH_NW_022151716.1	+	17160	17189	CACAGTG	GACACAAAC	IGHV3-69-1*01	+	89.0785	13	16867	GAGGTGCAACTGATCGAGTCTGGGGAGGCTTGGTACAGCCTGGGGAGTCCCTGAGACTCTCCTGTGAGGGCTCTGGATTCACCTTTAGTAGCTATACCATGGATTCAGTCCACCAGGGTCCAGGGAAGGGGCTGGAGTGGGTCTCAGTTATTAGCAGTGGTGGTACCGTACACTACGCAGACTCTGTGAAGGGCCGATTCACCATCTCCAGAGACAATGCCAAGAACTCAACTGTATCTGCAAATGAACAGCCTGAGAGCCGAGGACACGGCTGTGTATTACTGTGTGAGAGG
IGH_NW_022151721.1	+	17173	17202	CACAGTG	GACACAAAC	IGHV3-69-1*01	+	88.7372	13	16881	GAGGTGCAACTGATCGAGTCTGGGGGAGGCTTGGTACAGCCTGGGGAGTCCCTGAGACTCTCCTGTGAGGGCTCTGGATTCACCTTTAGTAGCTATACCATGGATTCAGTCCACAGGGTCCAGGGAAGGGGTGGAGTGGGTCTCAGTTATTAGCAGTGGTGGTACCGTACACTACGCAGACTCTGTGAAGGGCCGATTCACCATCTCCAGAGACAATGCCAAGAACTCAACTGTATCTGCAAATGAACAGCCTGAGAGCCGAGGACACGGCTGTGTATTACTGTGTGAGAGG
IGH_NW_022152466.1	+	17148	17177	CACAGTG	GACACAAAC	IGHV3-69-1*01	+	89.3836	13	16856	GAGGTGCAACTGATCGAGTCTGGGGAGGCTTGGTACAGCCTGGGGAGTCCCTGAGACTCTCCTGTGAGGGCTCTGGATTCACCTTTAGTAGCTATACCATGGATTCAGTCCACCAGGGTCCAGGGAAGGGGCTGGAGTGGGTCTCAGTTATTAGCAGTGGTGGTACCGTACACTACGCAGACTCTGTGAAGGGCCGATTCACCATCTCCAGAGACAATGCCAAGAACTCACTGTATCTGCAAATGAACAGCCTGAGAGCCGAGGACACGGCTGTGTATTACTGTGTGAGAGG
IGH_NW_022154614.1	+	29139	29168	CACAGTG	GACACAAAC	IGHV3-69-1*01	+	89.726	13	28846	GAGGTGCAACTGATCGAGTCTGGGGGAGGCTTGGTACAGCCTGGGGAGTCCCTGAGACTCTCCTGTGAGGGCTCTGGATTCACCTTTAGTAGCTATACCATGGATTCAGTCCACCAGGGTCCAGGGAAGGGGCTGGAGTGGGTCTCAGTTATTAGCAGTGGTGGTACCGTACACTACGCAGACTCTGTGAAGGGCCGATTCACCATCTCCAGAGACAATGCCAAGAACTCACTGTATCTGCAAATGAACAGCCTGAGAGCCGAGGACACGGCTGTGTATTACTGTGTGAGAGG
IGH_NW_022154667.1	+	270246	270275	CACAGTG	GACACAAAC	IGHV3-13*01	+	93.1741	22	269953	GAGGTTCAGCTGGTGCAGTCTGGGGGAGGCTTGGTACAGCCTGGGGGGTCCCTGAGACTCTCCTGTGCAGGCTCTGGATTCACCTTCAGTAGCTATGCTATGCACTGGGTTCGTCAGGCTCCAGGAAAAGGTCTGGAGTGGGTATCAGCTATTGGTACTGGTGGTGGCACATACTATGCAGACTCCGTGAAGGGCTGATTCACCATCTCCAGAGACAATGCCAAGAACTCCTTGTATCTTCAAATGAACAGCCTGAGAGCCGAGGACATGGCTGTGTATTACTGTGCAAGAGA
IGH_NW_022154667.1	+	162236	162265	CACAGTG	GTCAGAAAC	IGHV1-NL1*01	+	95.5932	21	161941	CAGGTTCAGCTGTTGCAGCCTGGGGCTGAGGTGAAGAAGCCTGGGTCCTCAGTGAAGGTCTCCTGCCAGGCTTCCAGATACACCTTCACCAAATACTTTACACAGTAGGTGTGACAAAGCCCTGGACAAGGGCATAGTGGATGGGATGAATCAACCCTTACAATGATAACACACACTATGCACAGACGTTCTGGGGCAGAGTCACCATTACCAGTGACAGGTCCATGAGCACATCCTACATGGAGCTGAGCAGCCTGAGATCTGAAGACATGGTCGTGTATTACTGTGTGAGAGA
IGH_NW_022154667.1	+	284364	284395	CACAGTG	CACAAACCT	IGHV3-11*01	+	93.2203	13	284069	AGGTGCAGCTGGTGGAGTCTGGGGGAGGCTTGGTACAGCCTGGGGGGTCCCTGAGACTCTCCTGTGCAGCCTCTGGATTCACCTTCAGTAACCACTACACGAGCTGGGTCCTCCAGGCTCCAGGGAAGGGACTGGAGTGGGTTTCATACATTAGTGGTGATAGTGATTACACAAACTACGCAGACTCTGTGAAGGGCCGGTTCACCATCTCCAGGGACAACGCCAAGAACTCACTGTATCTGCGAATGAACAGCCTGAGAGCCGAGGACACGGCTGTGTATTACTGTGTGAAACA
IGH_NW_022154667.1	+	189393	189422	CACAGTG	GACACAAAC	IGHV3-15*01	+	97.0297	15	189090	GAGGTGCAGCTGGTGGAGTCTGCGGGAGGCCTTGGTACAGCCTGGGGGGTCCCTTAGACTCTCCTGTGCAGCCTCTGGATTCACTTTCAGTAACGCCTGGATGAGCTGGGTCCGCCAGGCTCCAGGGAAGGGGCTGGAGTGGGTTGGCCGTATTAAAAGCAAAGCTAATGGTGGGACAACAGCCTACGCTGCACCTGTGAAAGGCAGATTCACCATCTCAAGAGATGATTCAAAAAACATGCTGTATCTGCAAATGAACAGCCTGAAAACCGAGGACACCGCCGTGTATTACTGTACCACAGA

## Sheet: orangutan
contig	reference strand	heptamer index	nonamer index	heptamer	nonamer	best aligned human gene	alignment direction	alignment PI	longest common k-mer	start of gene	gene sequence
IGH_NW_019939832.1	+	12483	12512	CACAGTG	GACACAAAC	IGHV4-55*01	+	91.2162	23	12187	CAGGTGCAGCTGCAGGAGTGGGGCCCAGGACTGGTGAAGCCTTCGGAGACCCTGTCCCTCACCTGCGCTGTCTCTGATGACTCCATCAGCAGTGGAAACTGGTGGATCTGAGTCCGCCAGCCCTCAGGGAAGGGGCTGGAATGCATTGGGTACATTTATTATAGTGGGAGCAGCTACTACACCCCGTCCCTCAGGAGTTGAGTCACCGTGTCAGTAGACACGTCCAAGAACCAGTTTTCCCTGAAGCTGAGCTCTGTGACCGCCGCTGACACAGCCGTGTATTACTGTGCGAGAGA
IGH_NW_019942297.1	+	10530	10559	CACAGTG	GACACAAAC	IGHV4-55*01	+	91.2162	23	10234	CAGGTGCAGCTGCAGGAGTGGGGCCCAGGACTGGTGAAGCCTTCGGAGACCCTGTCCCTCACCTGCGCTGTCTCTGATGACTCCATCAGCAGTGGAAACTGGTGGATCTGAGTCCGCCAGCCCTCAGGGAAGGGGCTGGAATGCATTGGGTACATTTATTATAGTGGGAGCAGCTACTACACCCCGTCCCTCAGGAGTTGAGTCACCGTGTCAGTAGACACGTCCAAGAACCAGTTTTCCCTGAAGCTGAGCTCTGTGACCGCCGCTGACACAGCCGTGTATTACTGTGCGAGAGA
IGH_NC_036917.1	-	88733275	88733246	CACAGTG	GACACAAAC	IGHV3-48*01	+	94.4637	10	88733282	GAGGTGCAGCTGGTGGAGTCTGGGGGAGGCTTGGTACAGCCTGGGGGTTCCCTGAGACTCTCCTGTGCAGCCTCTGGATTCACATTCAGTAGCTATGGCATGAACTGGGTCCGCCAGGCTCCAGGGAAGGGGCTGGAGTGGGTTTCATACATTAGTGGTGACAGTAGTTACATAAACTACGCAGACTCTGTGAAGGGCCGATTCACCATCTCCAGAGACAACGCCAAGAACTCATTGTATCTGCGAATGAACAGCCTGAGAGCCGAGGACACGGCTGTTTATTACTGTG
IGH_NC_036917.1	-	88503191	88503162	CACAGTG	GTCAGAAAC	IGHV1-46*01	+	96.1938	34	88503198	CAGGTGCAGCTGGTGCAGTCTGGGGCTGAGGTGAAGAGGCCTGGGGCCTCAGTGAAGGTTTCCTGCAAGGCTTCTGGTTACACCTTCACCAGCTGCTATATGTACTGGGTGCAACAGGCCCCTGGACAAGGGCTTGAGTGGATGGGAGTAATCAACCCTAGTGATGGTAGCACAAGCTACGCACAGAAGTTCCAGGGCAGAGTCACCATGACCAGGGACACATCCACAAGCACAGTCTACATGGAGCTGAGCAGCCTGAGATCTGAGGACACGGCCGTGTATTACTATG
IGH_NC_036917.1	-	88077120	88077090	CACAGTG	CACAAATTT	IGHV3-7*01	+	85.9532	9	88077127	GAGGTGCAGCTGGTGGAGTCTGGGGGAGGCTTGATACAGCCCAGGGGGGTCTCTGAGACTTTCTTGTACAGCCTCTGGATTCACCTTCAGTAGCTCCTGGATGAACTGGATCCACCAGTCTCTGGGGAAGGGGCTGGAGTGGGTGGCCAACATAAACTATGAAGTGAGAAATACTATGTAGATTCTGTGAAGGGCTGATTCACCATCTCCAGAAACAATGCCAAGAAGTCCTTGTATCTGCAAATGAACAGCCTGAGAGCCAAGGACATGGAGGACATGGCGGTGCATTACTGTG
IGH_NC_036917.1	-	88207654	88207625	CACAGTG	GTCAGAAAC	IGHV1-NL1*01	+	97.9094	24	88207661	AGGTTCAGCTGTTGCAGCCTGGGGCTGAGGTGAAGAAGCCTGGGTCCTCAGTGAAGGTCTCCTGCCAGGCTTCCAGACACACCTTCACCAAATACTTTACGCAGTGGGTGCAACAGGGCCCTGGACAAGGGCATAGTGGATGGGATGCATCAACCCTTACAATGATAACACACACTACGCACAGAAGTTCCGGGGCAGAGTCACCATTACCAGTGACAGGTCCATGAGCACAGCCTACATGGAGCTGAGCAGCCTGAGATCTGAAGACATGGTCGTGTATTCCTGTG
IGH_NC_036917.1	-	88107838	88107809	CACAGTG	GACACAAAC	IGHV3-22*01	+	93.2203	18	88107845	GAGGTGCAGCTGGTGGAGTCTGGGGGAGGCTTGGTACAGCCTGGGGGTTCCCTGAGACTTTCCTGTGCAGCCTCTGGATTCACCTTCAGTAACTACTACATGCACTGGGTCCGCCAGGCTCCAGGGAAGGGGCTGGAATGGGTAGGTTTCATTGCAAGCAAAGCTTATGGTGGGACAACAGAATACGCCGCGTCTGTGAAAGGCAGATTCACAATCTCAAGAGATGATTCCAAGAGCATCGTCTATCTGCAAATGAGCAGCCTGAAAACCGAGGATACGGCCGTGTATTACTGTT
IGH_NC_036917.1	-	88632120	88632091	CACAGTG	GACAAAAAC	IGHV4-30-4*02	+	94.863	22	88632127	CAGGTGCAGCTGCAGGAGTCGGGCCCAGGACTGGTGAAGCCTTCGGAGACCCTGTCCCTCACCTGCGCTGTCTCTGGTGGCTCTATCAGCAGTGGTTACTACTGGGGCTGGATCCGGCAGCCACCAGGGAAGGGACTGGAGTGGATTGGGAGTATCTATTACAGTGGGAGCACCTACTACAACCCGTCCCTCAAGAGTCGAGTCACCATATCAGTAGACACGTCCAAAAACCAGTTCTCCCTGAAGCTGAGCTCTGTGACCGCCGAGGACACGGCCGTGTATTACTGTG
IGH_NC_036917.1	-	87976638	87976609	CACAGTG	GTCACAAAC	IGHV4-4*01	+	98.2699	22	87976645	CAGGTGCAGCTGCAGGAGTCGGGCCCAGGACTGGTGAAGCCTTTGGAGACCCTGTCCCTCACCTGCGCTGTCTCTGGTGGCTCCATCAGCAGTAGTAACTGGTGGAGCTGGGTCCGCCAGCCCCCAGGGAAGGGCCTGGAGTGGATTGGGGAAATCTATCAAAGTGGGAGCACCAACTACAACCCGTCCCTCAAGAGTCGAGTCACCATATCAGTAGACAAGTCCAAGAACCAGTTCTCCCTGAAGCTGAGCTCTGTGACCGCCGCGGACACGGCCGTGTATTACTGTG
IGH_NC_036917.1	-	88303191	88303162	CACAGTG	GTCAGAAAC	IGHV7-4-1*01	+	92.0139	37	88303198	CAGGTGCAGCTGGTGCAGTCTGAGCCTGAGATGAAGCAGCCTGGGGCCTCAGTGAAGTTCTCCTGCAAGGCTACTGGTTACACCTTCACTAGCTATGTTATGAACTGGGTGCGACAGGCCCCTGGACAAGGGCTTGAGTGGGTGGGATGGATCAACACCAACACTGGGAACCCAATGTATGCCCAGGGCTTCACAGGACAGTTTGTCTTCTCCATGGACACCTCTGTCAGTACAGTATATCTGCAGATCAGTAGCCTAAAGGCTGAGGACATGGCTGTGTATTACTGTT
IGH_NC_036917.1	-	88499064	88499035	CACAGTG	GTCAGAAAC	IGHV1-45*01	+	95.5017	24	88499071	CAGATGCAGCTGGTGCAGTCTGGGGCTGAGGTGAAGAAGCCTGGGTCCTCAGTGAAGGTTTCCTGCAAGGCTTCTGGATACACCTTCACCGACCGCTACCTGCACTGGGTGCGACAGGCCTGGACAAGAGCTTGAGTGGATGGGATGGATCACACCTTACAATGGTAACACCAACTATGCACAGAAGTTCTAGGACAGAGTCACCATTACCAGGGACAGGTCTATGAGCACAGCCTACATGGAGCTGAGCAGCCTGAGACCTGAGGACACAGCCGTGTATTACTGTG
IGH_NC_036917.1	-	88793973	88793944	CACAGTG	GACACAAAC	IGHV3-69-1*01	+	94.1176	13	88793980	GAGGTGCAGCTGGTGGAGTCTGGGGGAGGCTTGGTCCAGCCTGGGGGGTCCCTGAGACTCTCCTGTGCAGCCTCTGGATTCACCTTCAGAGACCACTACATGAACTGGGTCCGCCAGGCTCCAGGGAAGGGGCTGGAGTGGGTCTCAGCTATTAGTGGTAGCAGTAGCAGCACATACTATGCAGACTCTGTGAAGGGCCGATTCACCATCTCCAGAGACAACGCCAAGAACACGCTGTATCTGCAAATGAACAGCCTGAGAGCCGAAGACACAGCTGTGTATTACTGTG
IGH_NC_036917.1	-	88531657	88531628	CACAGTG	GACACAAAC	IGHV3-48*01	+	94.1176	13	88531664	GAGGTGCAGCTGGTGGAGTCTGGAGGAGGCTTGGTACAGCCTGGGGGGTCCCTGAGACTCTCCTGTGCAGCCTCTGAATTCACCTTCAGTAGTAATGACATGAGCTGGGTCCGCCAGGCTCCAGAGAAGGGACTGGAGTGGGTCTCATACATTAGTAACAGTGGTAGAACCACATACTATGCAGACTCCGTGAAGGGCCGATTCACCATATCCAGAGACAACGCCAAGAACTCACTGTATCTGCAAATGAACAGCCTGAGAGCCGAGGACACGGCTGTGTATTACTGTG
IGH_NC_036917.1	-	88334977	88334948	CACAGTG	GACACAAAC	IGHV3-30*02	+	96.1806	13	88334984	AAGTGCAGCTGGTGGAGTCTGGGGGAGGCTTGGTCCAGCCTGGGGGTTCCCTGAGACTCTCCTGTGCGGCCTCTGGATTCACCTTCAGTAGCTATGGCATGCACTGGGTCCGCCAGGCTCCAGGAAAGGGGCTGGAGTGGGTGGCAGTTATATGGTATGATGGAAGTAATAAATACTATGCAGACTCCGTGAAGGGCCGATTCACCATCTCCAGAGACAATTCCAAGAACACGCTGTATCTTCAAATGAACAGCCTGAGAGTGGAAGACACGGCTGTGTATTACTGTG
IGH_NC_036917.1	-	88859128	88859099	CACAGTG	GACACAAAC	IGHV3-22*01	+	91.4676	16	88859135	GTGGTGCAGCTGGTGGAGTCTGGGGGAGGCTTGGTACAGCCTGGGGGGTCCCTGAGACTCTCCTGTGCAGCGTCTGGATTCACCATCAGTGACCACTACATGAGCTGGGTCCGCCAGGCTCCAGGGAAGGGGCTGGAGTGGGTGGGTTTAATTAGAAGCAAAGCTTATGGTGGAACAACAGAATATGCCGCATCTGTGAAAGGCAGATACACCGTCTCAAGAGATGATTCCAAAAGCATCGTCTATCTGCAAATGAGCAGCCTGAAAACCGAGGACACGGCCGTGTATTGCTG
IGH_NC_036917.1	-	88922287	88922258	CACAGTG	GACACAAAC	IGHV3-72*01	+	90.5085	17	88922294	GAGGTGCAGCTGGTGGAGTCTGGGGGAGGCTTAGTCCAGCCTGGCGGGTCCCTGAGACTCTCCTGTGCTGCCTCTGGATTCACCTCCAGTGACTACCAGATGTACTGGGTGCGCCAGGCTTCTGGGAAAGGACCGGAGTGGGTTGGCTATATTGGAAGCAAATCTAACAGTTATGCGACAGCATACGCTGCGTCTGTGAAAGGCAGGTTCACCATCTCAAGAGATGATTCAAAGAACACACTGTATCTGCAAATGAACAGCCTGAAAACCGAGGACATGGCCGTGTATTACTGTG
IGH_NC_036917.1	-	88462403	88462374	CACAGTG	GACAAAAAC	IGHV3-43*01	+	94.5017	13	88462410	GAAGTGCAGCTGGTGGAGTCTGAGGGAGGCTTGGTACAGCCTGGGGGTTCCCTGAGACTCTCCTGTGCAGCCTCTGGATTCACCTTTGATGATTATGCCATGCACTGGGTCCGTCAAGCTCCAGGGAAGGGTCTGAAGTGGGTTTCTGGTATTAATTGGAATGGTGGTAGCACATACTATGCAGATTCTGTGAAGGGCTGATTCACCATCTCCAGAGACAACAGCAAAAACTCCCTGTATCTGCAAATGAACAGTCTGAGAGCTGAGGACACGGCCTTGTATTACTGTGCA
IGH_NC_036917.1	-	88232859	88232830	CACAGTG	GACACAAAC	IGHV3-22*01	+	93.8776	12	88232866	GAGGTGCAGCTGGTGGAGTCTGGGGGAGGCTTGGTACAGCCTGGGGGATCCCTGAGACTCTCCTGTGCAGCCTCTGGATTCACCTTCAGTAACTACTACATGCACTGGGTCCGCCAGGCTCCAGGAAAGGGGCTGGAATGGGTAGGTTTCATTAGAACCGAAGCTAAAGGTGGGACAACAGAATACGCCGCGTCTGTGAAAGGCAGATTCACCATCTCAAGAGATGATTCCAAAAGCATCGCCTATCTGCAAACGAACAGCCTGAAAACCGAGGACACGGCTGTGTATTACTGTA
IGH_NC_036917.1	-	88691605	88691576	CACAGTG	GACACAAAC	IGHV3-13*01	+	92.6573	13	88691612	GAGGTGCAGCTGGTGGAGTCTGGGGGAGGCTTGGTACAGCCTGGGGGGTCCCTGAGACTCTCCTGTGCAGCCTCTGGATTCACCATCAGTAGCTACGACATGCACTGGGTCCACCAGGCTCCAGGAAAAGGTCTGGAGTGGGTCTCAGCTATTAGTACTGGTGGTGGCACATACTATGCAGACTCTGTGAAGGGCCGATTTACCATATCCAGAGACAACGCCAAGAACACGCTGTATCTGCAAATGAACAACCTGAGAGCCGAGGACACGGCTGTGTATTACTGTG
IGH_NC_036917.1	-	88068603	88068573	CACAGTG	CAAAAACCC	IGHV5-51*01	+	94.0767	20	88068610	GAGGTGCAGCTGGTGCAGTCTGGAGCAGAGGTGAAAAGGCCCGGGGAGTCTCTGAGGATCTCCTGTAAGGGTTCTGGATATAGCTTTACCAGCTACTGGATCAGCTGGGTGCGCCAGATGCCTGGGAAAGGCTTGGAGTTGATGGGGATGATTGATCCTAGTGATTCTGATACCAGATACAGCCAATCCTTCCAAGGCCACATCACCATCTCAGCCGACAAGTCCATCAGCACCGCCTACCTGCAGTGGACCAGCCTGAAGGCCTCGGACACCGCCATGTATTACTG
IGH_NC_036917.1	-	87969756	87969727	CACAGTG	GTCAGAAAC	IGHV1-3*01	+	93.7716	33	87969763	CAGGTCCAGCTGGTGCAGTCTGGGGCTGAGGTGAAGAAGCCTGGGGCCTCAGTGAAGTTCTCCTGCAAGGCTTCTGGATATACCTTCACCGACTACTTTATGCACTGGATGCTCCAGGCCCCTGGACAAAGGCTTGAGTGGATGGGATGGATCAGCGCTGGCAATGGTAACACAAAATATTCACAGAAGTTCCAGGGCAGAGTCACCATTACCAGAGACACGTCCGCGAGCACAGCCTACATGGAGCTGAGCAGCCTGAGATCTGAGGACACGGCTGTGTATTACTGTG
IGH_NC_036917.1	-	88755914	88755885	CACAGTG	GTCAGAAAC	IGHV1-69*02	+	94.8097	35	88755921	CAGGTCCAGCTGGTGCAGTCGGGGGCTGAGGTGAAGAAGCCTGGGTCCTCAGTGAAGATCTCCTGCAAGGTTTCTGAAGACACCTTCAGCAGCTATGCTATCAGCTGGGTGCAACAGGCCCCTGGACAAGGGCTTGAGTGGATGGGAGGGATCATCCCTGTGCTTGGTACAGCAGACTATGCACAGAAGTTCCAGGGCAGAGTCACGATTACTGCGGACACATCCACGAGCACAGCCTACATGGAGCTGAGCAGCCTGAGATCTGAGGACACGGCCGTGTATTACTGTG
IGH_NC_036917.1	-	88264391	88264362	CACAGTG	GACACAAAC	IGHV3-25*01	+	93.7716	9	88264398	GAAGTGTAGCTGGTGGAGACCGGGCGAGGCTTGGCAAAGCCTGGGTGGTCCCCGAGACTCTCCTGTGCCGCCTCTCGATTCACCTTCAGTAGCTACTACATGAACTGTGTCTGCCAGGCTCCAGGGAATAGGCTGGAGTTGGTTGGACAAGTTAATCCTAATGGGGGTAGCACATACCTCATAGACTCCGGGAAGGGCCAATTCACTACCTCCAGAGATAACGCCAAGAACACTCTTCATCTGCAAATGAACAACCTGAAAACCGAGGACATGGCCCTGTATTAGTGTA
IGH_NC_036917.1	-	88624821	88624792	CACAGTG	GACAAAAAC	IGHV4-4*07	+	96.8531	22	88624828	CAGGTGCAGCTGCAGGAGTCGGGCCCAGGACTGGTGAAGCCTTCGGAGACCCTGTCCCTCACCTGCGCTGTCTCTGGTGGCTCCATCAGTAGTAACTACTGGAGCTGGATCCGGCAGCCACCAGGGAAGGGACTGGAGTGGATTGGATATATCTATTCCAGTGGGAGCACCTACTACAACCCCTCCCTCAAGAGTCGAGTCACCATGTCAATAGACACGTCCAAGAACCAGTTCTCCCTGAAGCTGAGCTCTGTGACCGCCGCGGACACGGCCGTGTATTACTGTG
IGH_NC_036917.1	-	88034507	88034478	CACAGTG	GACACAAAC	IGHV3-71*01	+	89.8305	16	88034514	GAGGTGCAGCTGGTGGAGTCTGGGGGAGGCTTGGTCCAGCCTGGGGGATCCCTGAGACTCTCCTGTGCAGCCTCTGGATTCACCTTCAGTAACCACTACATGCAGTGGGTCCGCCAGGCTCCAGGGAAGGGGCTGGAGTGGGTAGGATTAATTAGAAACAAAGCTGATGGTGAGACAACAGACTACGCTGCATCAGTGAAAGGCAGAGTCACTATTTCCAGAGATGATTCGAAAAGCATCACCTATCTGCAAATGAGCAGCCTGAAAACTGAGGACAGCGCCGTGTATTACTGTG
IGH_NC_036917.1	-	88656466	88656437	CACAGTG	GACACAAAC	IGHV4-4*07	+	95.1049	22	88656473	CAGGTGCAGCTGCAGGAGTCGGGCCCAGGACTGGTGAAGCCTTCGGAGACCCTGTCCCTCACGTGCGCTGTCTCTGGTGGCTCCATCAGTGGTTACTCCTGGAGCTGGATCCGGCAGCCCCCAGGGAAGGGGCTGGAGTGGATTGGGAGTATCCATTCCAGTGGGAGCACCTACTACAACCCGTCCCTCAAGAGTCGAGTCACCATATCAGCAGACACGTCCAAAAACCAGTTCTCCCTGAAGCTGAGCTCTGTGACCGCCGCGGACACGGCCGTGTATTACTGTG
IGH_NC_036917.1	-	88719766	88719737	CACAGTG	GTCAGAAAC	IGHV1-69*02	+	94.8097	35	88719773	CAGGTCCAGCTGGTGCAGTCGGGGGCTGAGGTGAAGAAGCCTGGGTCCTCAGTGAAGATCTCCTGCAAGGTTTCTGAAGACACCTTCAGCAGCTATGCTATCAGCTGGGTGCAACAGGCCCCTGGACAAGGGCTTGAGTGGATGGGAGGGATCATCCCTGTGCTTGGTACAGCAGACTATGCACAGAAGTTCCAGGGCAGAGTCACGATTACTGCGGACACATCCACGAGCACAGCCTACATGGAGCTGAGCAGCCTGAGATCTGAGGACACGGCCGTGTATTACTGTG
IGH_NC_036917.1	-	88949022	88948991	CACAGTG	AACAAACCT	IGHV3-48*01	+	83.9721	10	88949029	GAAGTGTAGCTGTTAGAGTCTGGGGGAGGCTTGGTAAAGCCTGGGGGGTCCATGTGACTCTCCTGTGCAGCCTCTGGATACACCTTCAGTAGCTATGGCATGCACTAGGTGGACCAAACTCCAAGGAAGGGACTGGAGTGGGTCTTACATTAATGCTAGTGGTGGAAGCACATACTACTCAGACTCTTTGAAGGGCCGATTCACCATCTCCAGAGAAAACACCAAGAACTCACTGTATCTGCAAATAAACAGTTTGATTGCTGACACCATGGCTGTCTATTACTG
IGH_NC_036917.1	-	88817941	88817912	CACAGTG	GACACAAAC	IGHV3-73*01	+	94.6128	11	88817948	GAGGTGCAGCTGGTGGAGTCTGGGGGAGGTTTGGTCCAGCCTGGGGGGTCCCTGAGACTCTCCTGTGCAGCCTCTGGATTCACCTTCAGTAGCTCTGCTATGCACTGGGTCCGTCAGGCTCCTGGGAAAGGCCTAGAGTGGGTTGGACGTATTAGAAGCAAAGCTAACAGTTACGCGACAGAATACGCCGCGTCTGTGAAAGGCAGGTTCACCATCTCCAGAGATGATTCAAAGAACACGGCGTATCTGCAAATGAACAGCCTGAAAACCGAGGACACGGCCCTGTATTACTGTACT
IGH_NC_036917.1	-	88292188	88292159	CACAGTG	CAGAAACCC	IGHV1-46*01	+	88.5813	29	88292195	CAGGTGCAGCTGGTGCAGTCTAGGGCTGAGTTGAAGAAGCCTGGGTCCTCATTGAAGGTCTCCGGCAAGGCTTGTGGATATGCCTTTACTAGCTACTATATGCACTGGGTGTGACAGGCCCCTGGACAAGGCCTTGAGTGGATAGGATTGATCTCCCCTTACAATGGTAACAAAGACTACGCACAGAACTTCCAGGGCAGAGTCACCATGATCACGGACACGTCCACGAGCACAGCCTACATGGAGCTGAGCAGCCTGAGATCTGAGGACACGGCCATGTATTACTGTG
IGH_NC_036917.1	-	88455489	88455458	CACAGTG	CACAAATCT	IGHV3-73*01	+	87.9599	10	88455496	GAGGCACAGCTGGTGGAGTCTGGGGGAGGCTTGGTATACAGCCTGGGTGGGTCCCTGAGACTCTCATTTGCAGCCTCTGGATTCACCTTCAGTGACTTCTGGATGCACTGGATCCGCCAGGCTTCTGGCAAAGGGCTGGAGTGGGTTGGCCGTATTAGAACCAAACGTAACAGTTACGTGACAGAATGCGCTGCATCTGTGAAAGGCAGGTTCACCATCTCAAGAGATGATTCAAAGAACACACTGTATATGCAAATGAATACCCTGAAAACCGAGGACACGGCCATCTATTACTGTA
IGH_NC_036917.1	-	88389400	88389371	CACAGTG	AACACAAAC	IGHV3-38*01	+	94.7552	13	88389407	GAGGTGCAGCTGGTGGAGTCTGGGGGAGGCTTGGTACAGCCTGGGGGGTCCCTCAGACTCTCCTGTGCAGCCTCTGGATTCACTGTCAGTAGCAATGAGATGAGCTGGATCCGCCAGGCTCCAGGGAAGGGGCTGGAGTGGGTCTCAACCATTAGTAGAGGTGGTAGCACATACTACACAGACTCCGTGAAGGGCAGATTCACCATCTCCAGAGACAATTCCAAGAACACGCTGTATCTTCAAATGAACAGCCTGAGAGTGGAGGACACGGCTGTGTATTACTGTG
IGH_NC_036917.1	-	88782129	88782098	CACAGTG	CACAAACCT	IGHV3-22*01	+	94.898	21	88782136	GAGGTGCAGCTGGTGGAGTCTGGGGGAGGCTTGGTCCAGCCAGGGGGCTCCCTGAGACTCTCCTGTGCAGCCTCTGGATTCACCTTCAGTAACTACTACATGAGCTGGGTCCGCCAGGCTCCAGGGAAGGGGCTGGAATGGGAAGGTTTCATTAAAAACAAAACTAATGGTGGGACAACAGAATACGCCGCGTCTGTGAAAGGCAGATTCACCATCTCAAGAGATGATTCCAAAAGCATCACCTATCTGCAAATGAGCAGCCTGAAAACCGAGGACACGGCCGTGTATTACTGTA
IGH_NC_036917.1	-	88159065	88159036	CACAGTG	GACACAAAC	IGHV3-13*01	+	95.1049	13	88159072	GAGGTGCAGCTGGTGGAGTCTGGGGGAGGCTTGGTACAGCCTGGGGGGTCCCTGAGACTCTCCTGTGCAGCCTCTGGATTCACTGTCAGTAGCTACGACATGCACTGGGTTCGCCAGGCTCCAGGAAAAGGTCTGGAGTGGGTCTCAGCTATTGATACTGATGGTGACACATACTATGCAGACTCTGTGAAGGGCCGATTCACCATCTCCAGAGAAAATGCCAAGAACTCTTTGTATCTTCAAATGAACAGCCTGAGAGCCAAGGACACGGCTGTGTATTACTGTG
IGH_NC_036917.1	-	88550871	88550842	CACAGTG	GACACAAAC	IGHV3-49*01	+	97.9592	22	88550878	GAGGTGCAGCTGGTGGAGTCTGGGGGAGGCTTGGTCCACCCAGGGGGGTCCCTGAGACTCTCCTGTACAGCTTCTGGATTCACCTTTGGTGATTATGCCATGAGCTGGGTCCGCCAGGCTCCAGGGAAGGGGCTGGAGTGGGTAGGTTTCATTAGAAGCAAAGCTTATGGTGGGACAACAGAATACGCTGCGTCTGTGAAAGGCAGATTCACCATCTCAAGAGATGATTCCAAAAGCATCGCCTATCTGCAAATGAACAGCCTGAAAACCGAGGACACGGCCGTGTATTACTGTG
IGH_NC_036917.1	-	88649070	88649041	CACAGTG	GACAAAACC	IGHV4-4*07	+	96.2199	22	88649077	CAGGTGCAGCTGCAGGAGTCGGGCCCAGGACTGGTGAAGCCTTCGGAGACCCTGTCCCTCACCTGCGCTGTCTCTGGTGGCTCCATCAGTAGTTACTACTGGAGCTGGATCCGGCAGCCACCAGGGAAGGGACTGGAGTGGATTGGATATATCTATTCCAGTGGGAGCACCAACTACAACCCCTCCCTCAAGAGTCGAGTCACCGTATCGTATCAGTAGACACGTCCAAGAACCAGTTCTCCCTGAAGCTGAGCTCTGTGACTGCCGCGGACACGGCCGTGTATTACTGTG
IGH_NC_036917.1	-	88354029	88353998	CACAGTG	CAGAAAGCC	IGHV7-34-1*01	+	95.8042	39	88354036	CTGCAGCTGGTGCAGTCTGGGCCTGAGGTGAAGAAGCCTGGGGCCTCAGTGAAGGTCTCCTATAAGTCTTCTGGTTACACCTTCACCACTTATGGTATGAATTGGTTATGACAGACCCCTGGACAGGGCCTTGAGTGGATGAGATGGATCATCACCTAAACTGGGAACCCGACATATACCCACGGCTTCACAGGATGGTTTGTCTTCTCCATGGACACCTCTGTCAGCACGGCGTATCTTCAGATCAGCAGCCTAAAGGCTGAGGACACGGCTGAGTATTACTGTG
IGH_NC_036917.1	-	88091276	88091247	CACAGTG	GACACAAAC	IGHV3-21*01	+	91.6955	12	88091283	GATGTGCAGCTGGTGGAGTCTGGGGGAGGCTTGGTACAGCCTGGGGGGTCCCTGGGACTCTCCTGTGCAGCCTCTGGATTCACCTTCAGTAGCTATCGGATGAGCTGGATCCGCCAGGCTCCAGGGAAGGGGTTGGAGTGGGTTTCATACATTAGTGGTGATAGTAGTTACATATACTACGCAGACTCCATGAAGGGCAGATTCACCATCTCCAGAGACAACGCCAAGAACTTGCTTTATCTGCAAATGAATAGTCTGAGAGCCGAGGACACGGCTCTGTATTACTGTG
IGH_NC_036917.1	-	88877497	88877468	CACAGTG	GACACAAAC	IGHV3-23*01	+	94.8097	13	88877504	GAGGTGCAGCTGGTGGAGTCTGGGGGAGGCTTGGTCCAGCCTGGGGGTTCCCTGAGACTCTCCTGTGTAGCCTCTGGATTCACCTTTAGCAGCTATGCCATGAGATGGGTCCACCAGGCTCCAGGGAAGGGGCTGGAGTGGGTCTCAGCTATTAGTGGTAGTGGTGGTAGCACAAGGTACCCAGACTCTGTGAAGGGCCGATTCACCATCTCCAGAGACAATGCCAAGAACACGCTGTATCTGCAAATGAACAGCCTGAGAGCCAAGGACACGGCTGTGTATTACTGTG
IGH_NC_036917.1	-	88581265	88581236	CACAGTG	GACACAAAC	IGHV3-52*01	+	97.2318	17	88581272	GAGGTGCAGCTGGTGGAGTCTGGGTGAGGCTTGGTACAGCCTGGAGGGTCCCTGAGACTCTCCTTTGCAGCCTCTGGATTCACCTTCAGTAGCTCCTGGATGCACTGGGTCTGCCAGGCTCCAGAGAAGGGGCTGGAGAGGGTGGCCAACATAAAGTGTGATGGAAGTGAGAAATACTATGCAGACTCTGTGAAGGGCCGATTGACCATCTCCAGAGACAATGCCAAGAACTCCCTCTATCTGCAAATGAACAGCCTGAGAGCTGAGGACATGGCCGTGTATTACTGTG
IGH_NC_036917.1	-	88417279	88417250	CACAGTG	GTCAGAAAC	IGHV7-40*03	+	93.1741	31	88417286	TTTTCAATAGAAAAGTCAAGTAATCTATCTAAGTGTCAATCAGTGGATGATTAGATAAAATATGATATATGTAAATCATGGAATACTATGCAGCCAGTATGGTATGAATTCGGTGTGACCGGCCCCCGGACAAGGGCTTGAGTGGATGGGATGGATCATCACCTACACTGGGAACCCAATGTATACCCATGGCTTCCCAGGACAGTTTGTCTTCTCCATGGAGACCTCTGTCAGCATGGCATATCTGCAGATCAGCAGCCTAAAGGCTGAGGACATGGCCATGTATGACTGTA
IGH_NC_036917.1	-	88810232	88810203	CACAGTG	GACACAAAC	IGHV3-72*01	+	97.6271	22	88810239	GAGGTGCAGCTGGTGGAGTCTGGGGGAGGCTTGGTCCAGCCTGGGGGGTCCCTGAGACTCTCCTGTGCAGCCTCTGGATTCACCTTCAGTGACCACTACATGGACTGGGTCCGCCAGGCTCCAGGGAAGGGGCTGGAGTGGGTTGCCCGTATTAGAAACAAAGCTAACAGTTACACCACAGAATACGCCGCGTCTGTGAAAGGAAGATTTACCATCTCAAGAGATGATTCAAAGAACACACTGTATCTGCAAATGAGCAGCCTGAAAACCGAGGACACGGCCGTGTATTACTGTG
IGH_NC_036917.1	-	88186710	88186681	CACAGTG	GACACAAAC	IGHV3-15*01	+	97.619	22	88186717	GAGGTGCAGCTGGTGGAGTCTGGGGGAGGCTTGGTCCAGCCTGGGGGGTCCCTGAGACTCTCCTGTGCAGCCTCTGGATTCACTTTCAGTAACGCCTGGTTGAGCTGGGTCCGCCAGGCTCCAGGGAAGGGGCTGGAGTGGGTTGGCCGTATTAAAAGCAAAGCTGATGGTGGGACAACAGACTACGCTGCACCTGTGAAAGGCAGATTCACCATCTCAAGAGATGATTCAAAAAACACGCTGTATCTGCAAATGAACAGCCTGAAAACCGAGGACACGGCCGTGTATTACTGTG
IGH_NC_036917.1	-	88350390	88350361	CACAGTG	GATAAAAAC	IGHV4-34*01	+	94.0559	22	88350397	CAGGTGCAGCTACAGCAGTGGGGTGCAGGACTGGTGAAGCCTTCGGAGACCCTGTCCCTCACCTGCGCTGTCTATGGTGGGTCCTTCAGTGATTATGGCTGGAACTGGATCCGCCAGCCCCCAGGGAAGGGGCTGGAGTGGATTGGGTACATCGTTAGTAGTGGGAGAACCAACTACAACCCGTCCCTCAAGAGTCGAGTCACCATGTCAGTAGACACGTCCAAGAACCAGTTCTCCCTGAAGCTGAGCTCTGTGACCGCCGCGGACACGGCCGTGTATTACTGTG
IGH_NC_036917.1	-	88251889	88251860	CACAGTG	GTCAGAAAC	IGHV1-24*01	+	97.2222	33	88251896	AGGTCCAGCTGGTACAGTCCGGGGCTGAGGTGAAGAAGCCTGGGGCCTCAGTGAAGTTCTCCTGCAAGGTTTCTGGATACACCTTCACCGAATTATCCATGCACTGGGTGCGACAGGCTCCTGGAAAAGGGCTTGAGTGGATGGGAGGTTTTGATCCTGATGATGGTGAAACAATCTACGCACAGAAGTTCCAGGGCAGAGTCACCATGACCGAGGACACGTCTACAGACACAGCCTACATGGAGCTGAGCAGCCTGAGATCTGAGGACACGGCCATGTATTACTGTG
IGH_NC_036917.1	-	88644189	88644160	CACAGTG	GTCAGAAAC	IGHV1-58*01	+	94.8097	31	88644196	CAGGTCCAGCTGGGGCAGTCTGGGCCTGAGGTGAAGAAGCCTGAGTCCTCAGTGAAGGTCTCCTGCAAGGCTTCTGGATACACCTTTACTAGCTCTGCTATGCAGTGGGTGCGACAGGCTCCTGGACAAGGCCTTGAGTGGATAGGATGGATCATCGTTGGCAGTGGTAACACAAACTATGCACAGAAGTTCCAGGGAAGAGTCACCATTACCAGGGACACGTCCACGAGCACAGCCTACATGGAGCTGAGCAGCCTGAGATCCGAGGACACGGCCGTGTATTACTGTG
IGH_NC_036917.1	-	88413648	88413619	CACAGTG	GACACAAAC	IGHV4-4*07	+	94.0559	16	88413655	CAGGTGCAGCTGCAGGAGTCGGGCCCAGGACTGGTGAAGCCTTCGGAGACCCTGTCCCTCACCTGCGCTGTCTCTGGTGGCTCCATCAGCAGTTACTACTGGAGCTGGATCCGGCAGCCACCAGGGAAGGGGCTGGAGTGGATTGGGCATATCCATTATGGTGGTAGCAACTACCTCAACCCGTCCCTCAAGAGTCGAGTCACCATATCAGTAGACACGTCCAAGAACCAGTTCTCCCTGAAGCTGAGCTCTGTGACCGCCGCAGACACAGCCGTGTATTACTGTG
IGH_NC_036917.1	-	88216047	88216016	CACAGTG	CAGAAAAAC	IGHV1-18*01	+	85.3821	24	88216054	CAGGACCAGATGCAGCAGTCTGGGGCTGAGGTGAGGAAGCCTGGGACCTCAGTGAAGGTTTCTTGCAAGGTTTCTGGATATACCTCAAGCAGGTTACGTATCAGCTATCGTATCAGCTGGGTGCAACAGGTCCCTGGACAAGGGCTTGAATGGATGGGATGGATCATCACTGGCAAAGGTGACACAAACTATGCACAGAAGTTCCAGGGCAGAGTCACCATGACCAGGGACACGTCCACAAGCACAGCCTACATGGAGCTGAGCAGCCTGAGATCTGAGGACATGGCCGTGTATTACTGTG
IGH_NC_036917.1	-	88510759	88510730	CACAGTG	GATACAAAC	IGHV3-47*01	+	97.5524	13	88510766	GAGGATCAGCTGGTGGTGTCTGCGGGAGGCTTGGTACAGCCTGGGGGGTCCCTGAGACCCTCCTGTGCAGCCTCTGGATTCGCCTTCAGTAGCTATGTTCTGCACTGGGTTCGCCGGGCTCCAGGGAAGGGTCTGGAGTGGGTATCAGCTATTGGTACTGGTGGTGATACATACTATGCAGACTCCGTGATGGGCCGATTCACCATCTCCAGAGACAACGCCAAGAAGTCCTTGTATCTTCAAATGAACAGCCTGATAGCTGAGGACACGGCTGTGTATTACTGTG
IGH_NC_036917.1	-	88673726	88673697	CACAGTG	GACAAAAAC	IGHV4-4*07	+	96.8531	22	88673733	CAGGTGCAGCTGCAGGAGTCGGGCCCAGGACTGGTGAAGCCTTTGGAGACCCTGTCCCTCACCTGCGCTGTCTCTGGTGGCTCCATCACTAGTTACTACTGGAGCTGGATCCGGCAGCCACCAGGGAAGGGACTGGAGTGGATTGGATATATCTATTCCAGTGGGAGCACCTACTACAACCCCTCCCTCAAGAGTCGAGTCACCATGTCAGTAGACACGTCCAAGAACCAGTTCTCCCTGAAGCTGAGCTCTGTGACCGCCGCGGACACGGCCGTGTATTACTGTG
IGH_NC_036917.1	-	88116050	88116021	CACAGTG	GACACAAAC	IGHV3-23*01	+	94.4637	13	88116057	GAGGTGCAGCTGGTGGAGTCTGGGGGAGGCTTGGTACAGCCTGGGGGGTCCCTGAGGCTCTCCTGTGCAGCTTCTGGATTCACCTTCAGTAGCTACTCGATGAGCTGGGTCCGCCAGGCTCCAGGGAAGGGGCTGGAGTGGGTCTCAGCTATTAGTGGTAGCGGTAGTAGCACATACTACCCAGACTCCGTGAAGGGCCGATTCACCATCTCCAGAGACAACGCCAAGAACACGCTGTATCTGCAAATGAACAGCCTGAGAGCCGAGGACATGGCTGTGTATTACTGTG
IGH_NC_036917.1	-	88017707	88017678	CACAGTG	GACACAAAC	IGHV3-7*01	+	95.8333	17	88017714	GAGGTGCAGCTGGTGCAGTCTGGGGGAGGCTTGGTACAGCCTGGGGGGTCCCTGAGACTCTCCTGTGCAGCCTCTGGATTCACCTTTAGTAGCTACTGGATGAGCTGGGTCCGCCAGGCTCCAGGGAAAGGGCTGGAGTGGGTGGCCAACATAAAGCAAGATGGAAGTGAGAAATACTATGTAGACTCTGTGAAGGGCCGATTCACTGTCTCCGGAGACAACGCCGAGAACTCGCTGTATCTGCAAATGAACAGCCTGAGAGCCTAGGACACGGCTGTGTATTACTGTA
IGH_NC_036917.1	-	87951877	87951848	CACAGTG	GTCAGAAAC	IGHV1-2*01	+	92.3611	28	87951884	CAGGTCCAGCTGGTGCAGTCTGGGGCTGAGGTGAAGAAACCTGGGACCTCAGTGAAGATCTCCTGCAAGGCTTCTGGTTACACCTTCACCAGCTACTATATGCACTGGGTGCGACAGGCCCCTGGACAGGGGCTTGAGTGGATTGGACGGATCAACCCTAACAGTGGTAACACAAACTACGCACAGAAGTTTCAGGGCAGAGTCGCCATGACCAGGGACACGTCCATCAGCACAGCCTACATGGAGCTGAGAAGCCTGAGATCTGAGGACACAGCCACCTATTACTGT
IGH_NC_036917.1	-	88836229	88836200	CACAGTG	GACACAAAC	IGHV3-11*01	+	88.8502	18	88836236	GGTGCAGCTGGTAGAGTCTGCAAGAGGCTTGGTCCAGCCTGGGGGGTCCCTGAGACTCTCCTGTGCAGCCTCTGGATTCACCATCAGTAGCTGGTACACGAGCTGGATCCACCAGGCTCCAGGGAAGGGTCTGGAGTGGGTCTCATACATTTGTAGTAGTGGTTGTAACACAAACTACGCAGACTCTGTGAAGGGTAGATTCACCATCTCCAGAGACAACTCAAAGAACACGCTCTACCTGCAAATGAACAGCCTGAGAGTGGGGGACACGGCCGTGTATTACGTG
IGH_NC_036917.1	-	88573597	88573567	CACAGTG	CTAAAACCC	IGHV5-51*01	+	96.5398	20	88573604	GAGGTGCAGCTGGTGCAGTCTGGAGCAGAGGTGAAAAGGCCCGGGGAGTCTCTGAGGATCTCCTGTAAGACTTCTGGATACAGCTTTACCAGCAACTGGATCAGCTGGGTGCGCCAGATGCCCGGGAAAGGCCTGGAGTGGATGGGGAGCATCTATCCTGGTGACTCTGATACCAGATACAGCCCATCCTTCCAAGGCCACGTCACCATCTCAGCCGACAAGTCCATCAGCACCACCTACCTGCAGTGGAGCAGCCTGAAGGCCTCGGACACCGCCATGTATTACTGTG
IGH_NC_036917.1	-	88311178	88311149	CACAGTG	GTCAGAAAC	IGHV1-2*01	+	88.5813	42	88311185	CATGTCCAATTGGTGCAGTCTGGGGATGAGGTGAGGAAGCCTGGGGCCTCAGTGAAGGTCTCCTGCAAGGCTTCTGGATACACCTTCACCAACCACAACATGGACTGGGTGCGACAGGCCCCTGGACAAGGGTTTGAGTGGATGGGAGGGATCAACACTAACACTGGTGGCACAAGCTATGCACAGACTTTCCAGGGCAGAGTCATCATGACGAGGGACACGTCCACAAACACAGCCTTCATGGAGCTGAGCAGCCTGAGATCTGAGGACATGACTGTGTATTACTGTG
IGH_NC_036917.1	-	88769544	88769515	CACAGTG	GACACAAAC	IGHV3-48*01	+	92.1233	13	88769551	GAGCTGCAGCTGGTGGAGTCTAGGGGAGACTTGGTACAGCCTGGGGGGTCCCTAAGACTCTCCTGTGCAGCCTCTGGATTCACCTTCAGTAGCTATGGAATGAACTGGGTCTGCCAGGCTCCAGGGAAGGGGCTGGAGTGGGTCTCAGTTATTAGTAGGAGTAGTGGTACCATACACTACGCAGACTCCATGAAGGGCCGATTCACCATCTCCAGAGACAACGCCAAGAACTCACTGTATCTGCAAATGAACAACAGTCTGAGAGCCGAGGACACGGCTGTGTATTACTGTG
IGH_NC_036917.1	-	88048520	88048489	CACAGTG	CAGAAACCT	IGHV3-64*03	+	95.1557	13	88048527	GAGGTGCAGCTTGTGGAGTCTGGGGGAGGCTTGGTACAGCCTGGGGGGTCCCTGAGACTCTCCTGTGCAGCCTCTGGATTCACCTTCAGTAGCTATGCTATGTACTGGGTCCGCCAGGCTCCAGGGAAGGGACTGGAATGGGTATCAGCTATTAATAGTGGTGGGGGTAGCACATACTATGCAGACTCCGTGAAGGGCAGATTCACCATCTCCAGAGAAAATGCCAAGAACACACTGTATCTTCAAATGAGCAGTCTGAGAGCTGAGGACACGGCTGTGTATTACTGTG
IGH_NC_036917.1	-	88243964	88243935	CACAGTG	GACACAAAC	IGHV3-11*01	+	92.4399	13	88243971	AGGTGCAGCTGGTGGAGTCTGGGGGAGGCTTGGTACAGCCTGGGGGGTCCCTGAGACTCTCCTGTGCAGCCTCTGGATTCACGTTCACTAACTACTACCTGCACTGGTTCCGCCAGGCTCCAGGGAAGGGGCTGGAGTGGGTCGCATATATTAGTAGTGGTAGTGGTGGTAGCACAAACTACCCAGATTCTGTGAAGGGCCGATTCACCATCTCCAGAGACAACGCCAAGAACACGCTGTATCTGCAAATGAACAGCCTGAGAGCCGAGGACACGGCTGTGTATTACTGTG
IGH_NC_036917.1	-	88145372	88145343	CACAGTG	GACACAAAC	IGHV3-11*01	+	94.0972	13	88145379	AGGTGCAGCTGGTGGAGTCTGGGGGAGGCTTGGTACAGCCTGGGAGGTCCCTGAGACTCTCCTGTGCAGCCTCTGGAATCACCTTCAGTAACCAATACATGAGCTGGGTCCGCCAGGCTACAGGGAAGGGACTGGAGTGGGTTTCATACATTAGTGGTGATAGTAGTTACACAAGCTACGCAGACTCTGTGAAGGGCCGATTCACCATCTCCAGGGACAACGCCAAGAACTCACTGTATCTGCAAATGAACAGCCTGAGAGTCGAGGACACGGCTGTGTATTACTGTG
IGH_NC_036917.1	-	88604029	88604000	CACAGTG	GACAAAAAC	IGHV4-4*07	+	96.5035	22	88604036	CAGGTGCAGCTGCAGGAGTCGGGGCCAGGACTGGTGAAGCCTTCGGAGACCCTGTCCCTCACCTGCGCTGTCTCTGGTGGCTCCATCAGTAGTTACTACTGGAGCTGGATCCGGCAGCCACCAGGGAAGGGGCTGGAGTGGATTGGGGGTATCTATTCCAGTGGGAGCACCTACTACAACCCGTCCCTCAAGAGTCGAGTCACCATATCAGTAGACACGTCCAAGAACCAGTTCTCCCTGAAGCTGAGCTCTGTGACCGCCGCGGACACGGCCGTGTATTACTGTG
IGH_NC_036917.1	-	88668902	88668873	CACAGTG	GTCAGAAAC	IGHV1-58*01	+	93.7716	52	88668909	CAAATGCAGCTGGTGCAATCTGGGCCTGAGGTGAAGAAGCCTGGGGCCTCAGTGAAGGTCTCCTGCAAGGCTTCTGGATACACCTTTACTAGCTCTGCTATGCAGTGGGTGTGACAGGCTCCTGGACAAGGCCTTGAGTGGATAGGATGGATCATCGTTGGCAGTGGTAACACAAACTACGCACAGAAGTTCCAGGGCAGTCACCAATACCAGGGACACGTCCACGAGCGCAGCCAACATGGAGCTGAGCAGCCTGAGATCCGAGGACATGGCCGTGTATTACTGTG
IGH_NW_019938265.1	-	5601	5572	CACAGTG	GTCACAAAC	IGHV3-48*01	+	84.3206	10	5608	GAAGTGTAGCTGTTAGAGTCTGGGGGAGGCTTGGTAAAGCCTGGGGGGTCCATGTGACTCTCCTGTGCAGCCTCTGGATACACCTTCAGTAGCTATGGCATGCACTAGGTGGACCAAGCTCCAAGGAAGGGGCTGGAGTGGGTCTTACATTAATGCTAGTGGTGGAAGCACATACTACTCAGACTCTGTGAAGGGCCGATTCACCATCTCCAGAGAAAACAACAAGAACTCACTGTATCTGCAAATAAACAGTTTGATTGCTGACACCATGGCTGTCTCTTACTG

## Sheet: blue_whale_mBalMus1
contig	reference strand	heptamer index	nonamer index	heptamer	nonamer	best aligned human gene	alignment direction	alignment PI	longest common k-mer	start of gene	gene sequence
IGH_Super_scaffold_17	-	99794	99765	CACAGTG	GACACAAAC	IGHV4-55*01	+	72.6027	25	99801	CAGGGGCAGCTGCAGGAGTCGGGACCCAGCCTGGTGAAGCCCTCCCAGACCCTCTCCCTCACCTGCACTGTCTCCGGATTCTCATTAACCAGTTATGGTGTAGGCTGGGTCCGACAGGCTCCAGGAAAGGGGCTGGAGTATGTTGGTGCAATATGCAGTGGTGGAAGCGCATATTATAACCCAACTCTGAAGTCCCGGCTCAGCATCACCAGGGACACCTCCAAGAGCCAAGTCTATTTATCACTGAGCAGCCTGACAACTGAAGACACCGCCGTGTATTACTGTG
IGH_Super_scaffold_17	-	132351	132322	CACAGTG	GACACAAAC	IGHV3-23*01	+	90.0344	35	132358	GAGGTGCAGCTGGTGGAGTCTGGGGGAGGCCTGATGCAGCCAGGGGGGTCTCTGAGATTCTCTTGTGCAGCGTCTGGGTTCACCTTCAGTAGCTATCCCATGCGCTCGGTCCGCCAGGCTCCAGGGAAGGGGCTGGACAGGGTCTCAGTTAGTAGTAGTAGTGGTGGTAGCACATACTATGCAGACTCGGTGAAGGGCCAATTCACCATCTCCAGAGACAACTCCAAGAACACGCTGTATCTGCAAATGAACAACCTGAGATCTGAGGACACGGCCGTGTATTACTGTGTG
IGH_Super_scaffold_17	-	196496	196467	CACAGTG	GACACAAAC	IGHV4-55*01	+	72.069	25	196503	CAGGTGCATCTGCAGGATTCGGGACCCAGCCTGGTGAAGCCCTCACAGGCCCTCTCCCTCATCTGCACTGTCTCTGGATTCTCAATAACCAGCTATGCTGTAGCCTGGGTCCGACAGCCTCCAGGAAAGGGGCTGGAGTGGGTTGGGTGGATAAATACTGGTGGAAGCACATATTATAACCCAACTCTTAAGTCCTGGCTCAGCATCACCAGGGACACCTCCAAAAGCCAAGTCTATTTATCACTGAGCAGCTTGACAACTGAAGACACCGCCATGTATTACTGTG
IGH_Super_scaffold_17	-	162605	162576	CACAGTG	GACACAAAC	IGHV4-38-2*01	+	71.3311	23	162612	CAGGGGCAGCTGCAGGAGTCGGGACCCAGCCTGGTGAAGCCCTCACAGACCCTCTCCCTCACCTGCACTGTCTCTGGATTCTCATTAACCAGCTATGCTGTAGCCTGGGTCCGACAGCCTCCAGGAAATGGGCTAGAGTGGATTGGTGCTATGTGAAGTGATGGAAACACATATTATAACCCAACTCTGAAGTCCCGGCTCAGCATCACCAGGGACACCTCCAAGAGCCAAGTCTATTTATCACTGAGCAGCCTGACAACTGAAGACACAGCTGTGTATTACTGTG
IGH_Super_scaffold_17	-	126157	126128	CACAGTG	GACACAAAC	IGHV4-38-2*01	+	72.0137	20	126164	CAGGGGCAGCTGCAGGAGTCGGGACCCAGCCTGGTGAAGCCCTCCCAGACCCTCTCCCTCACCTGCACTGTCTCCGGATTCTCATTAACCAGTTATGGTGTAGGCTGTGTCCGACAGCCTCCGGGAAACTGGCTGGAGTGGGTTGGTGAGATGTGTTATAGTGGAAGCGCATATTATAACCCAACTCTGAAGTCCCGGCTCAGCATCACCAGGGACACCTCCAAGAGCCAAGTCTATTTATCACTGAGCAGCCTGACAACTGAAGACACCGCCGTGTATTACTGTG
IGH_Super_scaffold_17	-	55861	55832	CACAGTG	GACACAAAC	IGHV2-5*01	+	71.1409	25	55868	CAGGGGCAGCTGCAGGAGTCGGGACCCAGCCTGGTGAAGCCCTCCCAGACCCTCTCCCTCACCTGCACTGTCTCCGGATTCTCATTAACCAGCTATGCTGTAGCCTGGGTCCGACAGCCTCCAGGAAAGGGGCTGGAGTGGGTTGGTGTGATGGATTATGATGGAAGCGCATGTTATAACCCAACTCTGAAGTCCCGGCTCAGCATCACCAGGGACACCTCCAAGAGCCAAGTCTATTTATCCCTGAGCAGCCTGACAACTGAAGACACAACCCTGTATTACTGTG
IGH_Super_scaffold_17	-	152725	152696	CACAGTG	GACACACAC	IGHV4-55*01	+	70.7483	20	152732	CAGGTGCTGGTGCAGGTGTCGGGCCCAGGACTATTGAAGACCCTCTCCCTCACCTGCTCTGTCTCTGGATTCTCCATCACAAACAGTGCTGACTGCTGGGACTGGATCCATCATCCCCCAGGGAAAGGGCTGGGTCATCTGAGGTGCACTGAGTCTGTGCAAAGCACAGTGTACATCCTGTCTCTCCAAAAATTACATTCCATCTCCAGAGACACATCAGAGAACCAGTTCTCCCTGCAGATCAGCTCCGTGATATTTGAGGACACAGCCATATATTACTG
IGH_Super_scaffold_17	-	183814	183785	CACAGTG	GACACAAAC	IGHV4-28*01	+	82.4742	28	183821	AGGTGCAGCTGCAGCAGTGGGGCCCAGGACTGCTGAAGCCCTCACAGACCCTCACCCTCCCCTGTGCTGTCTATGGTTCCTCCATCACCAGTGGTTACTACTGCTGGAACTGGATCCGCCAGCCCACAGGGAAGGGACTAGAGTGGATGGGAAACATATGTAATGATGGGACCACTTACTACAGCCCATCGCTCAAGAGCCGCATCTCCATCTCCAGAGACACGTCCAAGAACCAGTTCTCCCTGCAGCTGAGCTCTGTGACCACCGAGGACACAGCTGTGTATTACTGTG
IGH_Super_scaffold_17	-	85319	85290	CACAGTG	GACACAAAC	IGHV4-4*01	+	71.8213	25	85326	CAGGGGCAGCTGCAGGAGTCGGGACCCAGCCTGGTGAAGCCCTCCCAGACCCTCTCCCTCACCTGCACTGTCTCCGGATTCTCATTAACCAGTTATGGTGTAGGCTGGGTCCGACAGGCTCCAGGAAAGGGGCTGGAGTATGTTGGTGCAATGTACAGTGATGGAAGCACATATTATAACCCAACTCTGAAGTCCCGGCTCAGCATCACCAGGGACACCTCCAAGAGCCAAGTCTATTTATCACTGAGCAGCCTGACAACTGAAGACACCGCCGTGTATTACTGTG
IGH_Super_scaffold_17	-	150261	150231	CACAGTG	CAAAAACCT	IGHV4-28*01	+	65.2027	22	150268	CAAGATTTTCCAGGAATGTCTGTGAAGCGAGGACCACATCAGAATGGAGGAGGCTGGCTGAGAAATGTTGAGTGTGATGGTTACTCTATAACCACTATTTATGGTTGGGGCTGGATCCTCGAGTTCCCAGTGATGAGGCTGGAATGGAGGAAATGTACAAATTCTGGTGGCAGCACTTACTACAGTCCATCCCTCACAAGTAGCACCTCCATATCTGGAGACACTTCCAAGAACCAGTTCTCCCTGCGTCTGAGCTATGTGACCACCAAGAAAAAGGACTTGTGTTACTGTG
IGH_Super_scaffold_17	-	114504	114475	CACAGTG	GACACAAAC	IGHV4-30-4*02	+	71.4286	23	114511	CAGGTGCAGCTGCAGGAGTCGGGACCAAGCCTGGTGAAGCCCTCACAGACCCTCTCCCTCACCTGCACTGTCTCCGGATTCTCATTAACTGGCTCTGGTGTATCCTGGGTCAGACAGCCTCCAGGAAAGGGACTGGAGATGGTTGGTGTGATGGATTATAGTGGAAGCACAGTCTATAACTCAACTCTTAAGTCCAGGCTCAGCATCACCAGGGACACCTCCAAGAGCCAAGTATATTTATCACTGAGCAGCCTGACAACTGAAGACACCGCCGTGTATTACTGTG
IGH_Super_scaffold_17	-	140946	140917	CACAGTG	GACACAAAA	IGHV4-30-4*02	+	70.5085	20	140953	CGGATGCAGCTGCAGGAGTCGGGACCCAGCCTGGTGAAGCCCTCACAGACCCTCTCCCTCACCTACACTGTCTCTGGATTCTCATTAACCTGCTATGGTGTACACTGGGCCTGCCAGTCTCTGGGAAAGGGGCTGGAGTGGGTTGGTGTAATGTGGTATAGTGGAAGCACATATTATAACCCAATTCTTAAGTCCCGTCTCAGCATCACCAGGGATACCTCCAAGAGCCAAGTCTATTTGTCGCTGAACAGCCTGACAACTGAGGACACAGCCCTATATTACTGTG
IGH_Super_scaffold_17	-	106342	106313	CACAGTG	GACACACAC	IGHV3-23*01	+	87.7551	38	106349	GAGGTGCAGCTGGTGGAGTCTGGGGGAGACCTGGTGCAGCCAGGGGGGTCTCTGAGACTCTCTTGTGCAGCGTCTGGATTCACCTTCAGTAGCTATGCCATGAGCTCGGTCGGTCCGCAGGTTCCAGGGAAGGTGCTGGACTGGGCCTCAGGTATTTGTAGTGAAGGTAGCACATACTCTGCAGACTCTGTGCAGGGCCGATTCACCATCTCCAGAGACAACTCCAAGAACATGCTGTATCTGCACATGAACAGCCTGAGATCTGAGGACACGGCCGTGTATTACTGTGTG
IGH_Super_scaffold_17	-	70594	70565	CACAGTG	GACACAAAC	IGHV4-4*01	+	71.9178	25	70601	CAGGGGCAGCTGCAGGAGTCGGGACCCAGCCTGGTGAAGCCCTCCCAGACCCTCTCCCTCACCTGCACTGTCTCCGGATTCTCATTAAGCAGTTATGCTGTAGGCTGGGTCCGACAGGCTCCAGGAAAGGGGCTGGAGTATGTTGGTGCTATTAACAGTGGTGGAAGCGCATATTATAACCCAACTCTGAAGTCCCGGCTCAGCATCACCAGGGACACCTCCAAGAGCCAAGTCTATTTATCACTGAGCAGCCTGACAACTGAAGACACCGCCGTGTATTACTGTG

## Sheet: bottlenose_dolphin_mTurTru1_mat
contig	reference strand	heptamer index	nonamer index	heptamer	nonamer	best aligned human gene	alignment direction	alignment PI	longest common k-mer	start of gene	gene sequence
IGH_mat_scaffold_11_arrow	-	202303	202272	CACAGTG	CACAAAGCC	IGHV3-23*01	+	93.4708	61	202310	GAGGTGCAGCTGGTGGAGTCTGGGGGAGGCTTGGTGCAGCCAGGGGGGTCTCTGTGACTCTCCTGTGCAGCCTCTGGATTCACCTTCAGTAGCGATGCCATGAGCTGGGTCCGCCAAGGCTCCAGGAAGGGGCTGGAGTGGATCTCAGTATTAGTAGTAGTGGTGGTAGCACATACTATGCAGACTCTGTGAAGGGCCGATTCACCATCTCCAGAGACAACTCCAAGAACACGCTGTATCTGCAAATGAACAGCCTGAGATCTGAGGACACGGCCGTGTATTACTGTGCTG
IGH_mat_scaffold_11_arrow	-	134827	134798	CACAGTG	GACACAAAC	IGHV3-23*01	+	90.378	48	134834	GAGGTGCAGCTGGTGGAGTCTGGGGGAGGCTTGGTGAAGCCTGGGGCGTCTCTGCGACTTTCCTGTGCCGCCTCTGGATTTACTTTTGATGATTATGCCATGAGCTGGGTCCGCCAGGCTCCAGGGAAGGGGCTGGAGTGGATCTCAGCTATTAGTTGGGATGGTGGTAGCACATACTATGCAAACTCTGTGAAGGGCCGATTCACCATCTCCAGAGACAACTCCAAGAACACGCTGTATCTGCAAATGAACAGCCTGAGATCTGAGGACACGGCCGTGTATTACTGTGCG
IGH_mat_scaffold_11_arrow	-	231784	231755	CACAGTG	GACACAAAC	IGHV3-23*01	+	94.1581	51	231791	GAGGTGCAGCTGGTGGAGTCTGGGGGAGGCTTGGTGCAGCCTGGGGGGTCTCTGCGCCTCTCCTGTGCAGCCTCTGGATTCACCTTCAGTAGCTATGCCATGAGCTGGGTCCGCCAGGCTCCAGGGAAGGGGCTGGAGTGGATCTCAGCTATTAGTAGTAGTGGTGGTAACACAAACTATGCAGACTCTGTGAAGGGCCGATTCACCATCTCCAGAGACAACTCCAAGAACACGCTGTATCTGCAAATGAACAGCCTGAGATCTGAGGACACGGCCGTGTATTACTGTGCG
IGH_mat_scaffold_11_arrow	-	198722	198693	CACAGTG	GACACAAAC	IGHV4-55*01	+	77.551	23	198729	CAGGTGCATCTGCAGGAGTCTGGCCCAGGACTGGTGAAGCCACAGCAGACCCTCTCCCTCACCTGTGCTGTCTCTGGATTCTCCATCACAACCAGTGGTTATTGCTGGAGCTGGGTCCGCCAGCCTCCAAGGAAAGACCTAGAGTGGATGGGAATCATATGCTATAATGGTGCCACAGCATATAACCCATCCCTCAAGAGCCACACCTCCATCTCCAGCGACCCGTCCAAGAACCAGTATTCCCTGCAGCTGAGCTCTGTGATCACAGAGGACACAGCCACGTATTACTGTG
IGH_mat_scaffold_11_arrow	-	165430	165401	CACAGTG	GACACAAAC	IGHV4-30-4*02	+	72.1088	23	165437	CAGGTGCAGCTGCAGGAGTCGGGACCCAGCCTGGTGAAGCCCTCACAGACCCTCTCCCTCACCTGCACTGTCTCTGGATTCTCATTAACCAGCAGTGCTGTAGCCTGGGTCCGGCAGGCTCCAGGAAAGGGGCTGGTAGGGTTGGTGCGATGGGTTATAGTGGAAGTGCATATTATAACCCAACTCTTAAGTCCCGGCTCAGCATCACCAGGGACACCTCCAAGAGCCAAGTCTACTTATCGCTGAGCAGCCTGACAACTGAGGACACAGCCCTGTATTACTGTG
IGH_mat_scaffold_11_arrow	-	129126	129097	CACAGTG	GACACAAAC	IGHV4-30-4*02	+	73.6486	25	129133	CAGGTGCAGCTGCAGGAGTCGGGACCCAGCCTGGTGAAGCCCTCACAGACCCTCTCCCTCACCTGCACTGTCTCTGGATTCTCATTAAGCAGCTATGCTGTATCCTGGGTCCGACAGCCTCCAGGAAAGGGGCTGGAGTGGGTTGGTGTGATGGGTAGTGGTGGAAGCGCATATTATAACCCAACTCTTAAGTCCCGGCTCAGCATCACCAGGGACACCTCCAAGAGCCAAGTCTACTTATCGCTGAGCAGCCTGACAACTGAGGACACAGCCGTGTATTACTGTG
IGH_mat_scaffold_11_arrow	-	192768	192739	CACAGTG	GACACAAAC	IGHV4-30-4*02	+	74.4898	29	192775	CAGGTGCAGCTGCAGGAGTCGGGACCCAGCCTGGTGAAGCCCTCACAGACCCTCTCCCTCACCTGCACTGTCTCTGGATTCTCATTAACCAGCACTGCTGTAGCCTGGGTCCGGCAGGCTCCAGGAAAGGGGCTGGAGTGGGTTGGGGGGATATATGGTAGTGGAAGCACAGATTATAACCCAACTCTTAAGTCCCGGCTCAGCATCACCAGGGACACCTCCAAGAGCCAAGTCTACTTATCGCTGAGCAGCCTGACAACTGAGGACACAGCCGTGTATTACTGTG
IGH_mat_scaffold_11_arrow	-	225249	225220	CACAGTG	GACACAAAC	IGHV4-30-4*02	+	74.4898	29	225256	CAGGTGCAGCTGCAGGAGTCGGGACCCAGCCTGGTGAAGCCCTCACAGACCCTCTCCCTCACCTGCACTGTCTCTGGATTCTCATTAACCAGCACTGCTGTAGCCTGGGTCCGGCAGGCTCCAGGAAAGGGGCTGGAGTGGGTTGGGGGGATATATGGTAGTGGAAGCACAGATTATAACCCAACTCTTAAGTCCCGGCTCAGCATCACCAGGGACACCTCCAAGAGCCAAGTCTACTTATCGCTGAGCAGCCTGACAACTGAGGACACAGCCGTGTATTACTGTG
IGH_mat_scaffold_11_arrow	-	157068	157039	CACAGTG	GACACAAAC	IGHV3-23*01	+	93.8144	43	157075	GAGGTGCAGCTGGTGGAGTCTGGGGGAGGCTTGGTGCAGCCTGGGGGGTCTCTGCGACTCTCCTGTGCAGCCTCTGGATTCACCTTCAGTAGCTATGCCATGGGCTGGGTCCGCCAGGCTCCAGGGAAGGGGCTGGAGTGGATCTCAGCTATTAGTAGTAGTGGTGGTAACACAAACTATGCAGACGCTGTGAAGGGCCGATTCACCATCTCCAGAGACAACTCCAAGAACACGCTGTATCTGCAAATGAACAGCCTGAGATCTGAGGACACGGCCGTGTATTACTGTGCG
IGH_mat_scaffold_11_arrow	-	246404	246375	CACAGTG	GACACAAAC	IGHV3-23*01	+	92.8082	43	246411	GAGATGCAGCTGGTGGAGTCTGGGGAAGGCTTGGTGCAGCCTGGGGGGTCTCTGCGACTCTCCTGTGCAGCCTCTGGATTCACCTTCAGTAGCTATGCCATGGGCTGGGTCCGCCAGGCTCCAGGGAAGGGGCTGGAGTGGATCTCAGCTATTAGTAGTAGTGGTGGTAACACAAACTATGCAGACGCTGTGAAGGGCCCGATTCACCATCTCCAGAGACAACTCCAAGAACACGCTGTATCTGCAAATGAACAGCCTGAGATCTGAGGACACGGCCGTGTATTACTGTGCG
IGH_mat_scaffold_11_arrow	-	180122	180093	CACAGTG	GACACAAAC	IGHV4-30-4*02	+	72.7891	29	180129	CAGGTGCAGCTGCAGGAGTCGGGACCCAGCCTGGTGAAGCCCTCACAGACCCTCTCCCTCACCTGCACTGTCTCTGGATTCTCACTAACCAGCAGCGATGTATCCTGGGTCCGACAGGCTCCAGGAAAGGGGCTGGAGTGGGTTGGGGTGATGGGTTATACTGGAAGTGCATATTATAACCCAACTCTTAAGTCCCGGCTCAGCATCACCAGGGACACCTCCAAGAGCCAAGTCTACTTATCGCTGAGCAGCCTGACAACTGAGGACACAGCCGTGTATTACTGTG
IGH_mat_scaffold_11_arrow	-	239861	239832	CACAGTG	GACACAAAC	IGHV4-30-4*02	+	73.2441	27	239868	CAGGGTGCAGCTGCAGGAGTCCGGGACCCAGCCTGGTGAAGCCCTCACAGAACCCTCTCCCTCACCTGCACTGTCTCTGGATTCTCATTAAGCAGCTATGCTGTAACCTGGGTCCGGCAGGCTCCAGGAAAGGGGCTGGAGTGGTTTGGTGTGATGGGTAGTAGTGGAAGCGCATATTATAACCCAACTCTTAAGTCCCGGCTCAGCATCACCAGGGACACCTCCAAGAGCCAAGTCTACTTATCGCTGAGCAGCCTTGACAACTGAGGACACAGCCCTGTATTACTGTG
IGH_mat_scaffold_11_arrow	-	171970	171941	CACAGTG	GACACAAAC	IGHV3-23*01	+	92.7835	60	171977	GAGGTGCAGCTGGTGGAGTCTGGGGGAGGCTTGGTGAAGCCTGGGGGGTCTCTGCGACTCTCCTGTGCAGCCTCTGGATTCACCTTCAGTAGCTATAGCATGAGCTGGGTCCGCCAGGCTCCAGGGAAGGGGCTGGAGTGGATCTCAGTTATTAGTTGGAACGGTGGTAGCACATACTATGCAGACTCTGTGAAGGGCCGATTCACCATCTCCAGAGACAACTCCAAGAACACGCTGTATCTGCAAATGAACAGCCTGAGATCTGAGGACACGGCCGTGTATTACTGTGCG
IGH_mat_scaffold_11_arrow	-	204333	204304	CACAGTG	GACACACAC	IGHV4-38-2*01	+	76.4085	22	204340	CAGGTGCAGTTTCAGGAGTGAGGCCCAGGACTAGTGAAGCCACAGCAGACCCTCTCCCTCACCTGTGCTGTCTCTGGTTACTCCATCACAAGTGGTTATGGTTGGAGCTGGATCAATCAATCCCCAGGGAAGAGGCTGCTGGGGATGGAGAAATATATGATGATGGGACCACTTACTACAGACCATCCCTCAAGAGCTGCACCTCCGTCTCCAGAGACACTTCCAGGAACCAGTTCTCGTTGAAGCTGAGCTCTGTGACCACCAAGGACTGTGCTGTGTA
IGH_mat_scaffold_11_arrow	+	393289	393318	CACAGTG	GACACAAAC	IGHV4-30-4*02	+	74.0864	25	392996	CAGGTGCAGCTGCAGGAGTCGGGACCCAGCCTGGTGAAGCCCTCACAGACCCTCTCCCTCACCTGCACTGTCTCTGGATTCTCATTAACCAGCACTGCTGTAGCCTGGGTCCGGCAGCCTCCAGGAAAGGGGCTGGAGTGGGTTGGGGGCATATATGGTGGTGGAAGCGCATATTATAACCCAACTCTTAAGTCCCGGCTCAGCATCACCAGGGACACCTCCAAGAGCCAAGTCTACTTATCGCTGAGCAGCCTGACAACTGAGGACACAGCCGTGTATTACTGTGTGAGAAA
IGH_mat_scaffold_11_arrow	+	99259	99288	CACAGTG	GACACAAAC	IGHV4-30-4*02	+	75.0831	29	98966	CAGGTGCAGCTGCAGGAGTCGGGACCCAGCCTGGTGAAGCCCTCACAGACCCTCTCCCTCACCTGCACTGTCTCTGGATTCTCATTAACCAGCACTGCTGTAGCCTGGGTCCGGCAGGCTCCAGGAAAGGGGCTGGAGTGGGTTGGGGGGATATATGGTAGTGGAAGCACAGATTATAACCCAACTCTTAAGTCCCGGCTCAGCATCACCAGGGACACCTCCAAGAGCCAAGTCTACTTATCGCTGAGCAGCCTGACAACTGAGGACACAGCCGTGTATTACTGTGCGAGAGA
IGH_mat_scaffold_11_arrow	+	263699	263728	CACAGTG	GACACAAAC	IGHV4-4*01	+	76.412	25	263400	CAGGTGCATCTGCAGGAGTCTGGCCCACGACTGGTGAAGCCACAGCAGACCCTCTCCCTCACCTGTGCTGTCTCTGGATTCTCCATCACAACCAGTGGTTATTGCTGGAGCTGGGTCCGCCAGCCTCCAAGGAAAGACCTAGAGTGGACGGGAATCATATGCTATAATGGTGCCACAGCATATAACCCATCCCTCAAGAGCCACACCTCCATCTCCAGCGACCCATCCAAGAACCAGTATTCCCTGCAGCTGAGCTCTGTGATCACAGAGGACACAGCCACGTATTACTGTGCAAGAGA
IGH_mat_scaffold_11_arrow	+	363635	363664	CACAGTG	GACACAAAC	IGHV4-30-4*02	+	74.4186	29	363342	CAGGTGCAGCTGCAGGAGTCGGGACCCAGCCTGGTGAAGCCCTCACAGACCCTCTCCCTCACCTGCACTGTCTCTGGATTCTCACTAACCAGCAGCGATGTATCCTGGGTCCGACAGGCTCCAGGAAAGGGGCTGGAGTGGGTTGGGGGGATATATGGTAGTGGAAGCACAGATTATAACCCAACTCTTAAGTCCCGGCTCAGCATCACCAGGGACACCTCCAAGAGCCAAGTCTACTTATCGCTGAGCAGCCTGACAACTGAGGACACAGCCGTGTATTACTGTGCGAGAGA
IGH_mat_scaffold_11_arrow	+	70111	70140	CACAGTG	GACACAAAC	IGHV4-30-4*02	+	72.4252	23	69819	CAGGTGCAGCTGCAGGAGTCGGGACCCAGCCTGGTGAAGCCCTCACAGACCCTCTCCCTCACCTGCACTGTCTCTGGATTCTCATTAACCAGCACTGCTGTAGCCTGGGTCCGGCAGGCTCCAGGAAAGGGGCTGGTAGGGTTGGTGCGATGGGTTATAGTGGAAGTGCATATTATAACCCAACTCTTAAGTCCCGGCTCAGCATCACCAGGGACACCTCCAAGAGCCAAGTCTACTTATCGCTGAGCAGCCTGACAACTGAGGACACAGCCCTGTATTACTGTGCTAGAGA
IGH_mat_scaffold_11_arrow	+	334837	334866	CACAGTG	GACACAAAC	IGHV4-30-4*02	+	74.6667	24	334544	CAGGTGCAGCTGCAGGAGTCGGGACCCAGCCTGGTGAAGCCCTCACAGACCCTCTCCCTCACCTGCACTGTCTCTGGATTCTCAATAACCAGTGATAGTGTATCCTGGGTCCGACAGCCTCCAGGAAAGGGGCTGGAATGGGTTGGTGCTATGGGTTATAGTGGAAACGCATATTATAACCCAGCTCTTAAGTCCCGGCTCAGCATCACCAGGGACACCTCCAAGAGCCAAGTCTACTTATCGCTGAGCAGCCTGACAACTGAGGACACAGCCGTGTATTACTGTGCGAGAGA
IGH_mat_scaffold_11_arrow	+	269654	269683	CACAGTG	GACACAAAC	IGHV4-30-4*02	+	74.3333	24	269361	CAGGTGCAGCTGCAGGAGTCGGGACCCAGCCTGGTGAAGCCCTCACAGACCCTCTCCCTCACCTGCACTGTCTCTGGATTCTCACTAACCAGCGATAGTGTAGCCTGGGTCCGACAGCCTCCAGGAAAGGGCCTGGAATGGGTTGGTACGATGGGTTATAGTGGAAGCGCATATTATAACCCAACTCTTAAGTCCCGGCTCAGCATCACCAGGGACACCTCCAAGAGCCAAGTCTACTTATCGCTGAGCAGCCTGACAACTGAGGACACAGCCGTGTATTACTGTGCGAGAGA
IGH_mat_scaffold_11_arrow	+	401558	401587	CACAGTG	GACACACAC	IGHV4-38-2*01	+	76.9759	22	401271	CAGGTGCAGTTTCAGGAGTGAGGCCCAGGACTAGTGAAGCCACAGCAGACCCTCTCCCTCACCTGTGCTGTCTCTGGTTACTCCATCACAAGTGGTTATGGTTGGAGCTGGATCAATCAATCCCCAGGGAAGAGGCTGCTGGGGATGGAGAAATATATGATGATGGGACCACTTACTACAGACCATCCCTCAAGAGCTGCACCTCCGTCTCCAGAGACACTTCCAGGAACCAGTTCTCGTTGAAGCTGAGCTCTGTGACCACCAAGGACTGTGCTGTGTATTACTGT
IGH_mat_scaffold_11_arrow	+	403588	403617	CACAGTG	GACACAAGC	IGHV3-23*01	+	93.2432	61	403290	GAGGTGCAGCTGATGGAGTCTGGGGGAGGGTTGGTGCAGCCAGGGGGGTCTCTGTGACTCTCCTGTGCAGCCTCTGGATTCACCTTCAGTAGCGATGCCATGAGCTGGGTCCGCCAGGCTCCAGGGAAGGGGCTGGAGTGGATCTCAGTTATTAGTAGTAGTGGTGGTAGCACATACTATGCAGACTCTGTGAAGGGCCGATTCACCATCTCCAGAGACAACTCCAAGAACACGCTGTATCTGCAAATGAACAGCCTGAGATCTGAGGACACGGCCGTGTATTACTGTGTGAAAGATA
IGH_mat_scaffold_11_arrow	+	305492	305521	CACAGTG	GACACAAAA	IGHV4-30-4*02	+	74.6667	24	305200	CAGGTGCAGCTGCAGGAGTCGGGACCCAGCCTGGTGAAGCCCTCACAGACCCTCTCCCTCACCTGCACTGTCTCTGGATTCTCAATAACCAGTGATAGTGTATCCTGGGTCCGACAGCCTCCAGGAAAGGGCTGGAATGGGTTGGTGCTATGGGTTATAGTGGAAGTGCATATTATAACCCAGCTCTTAAGTCCCGGCTCAGCATCACCAGGGACACCTCCAAGAGCCAAGTCTACTTATCGCTGAGCAGCCTGACAACTGAGGACACAGCCGTGTATTACTGTGCGAGAGA
IGH_mat_scaffold_11_arrow	+	372007	372036	CACAGTG	GACACAAAC	IGHV3-23*01	+	93.9189	43	371709	GAGGTGCAGCTGGTGGAGTCTGGGGGAGGCTTGGTGCAGCCTGGGGGGTCTCTGCGACTCTCCTGTGCAGCCTCTGGATTCACCTTCAGTAGCTATGCCATGGGCTGGGTCCGCCAGGCTCCAGGGAAGGGGCTGGAGTGGATCTCAGCTATTAGTAGTAGTGGTGGTAACACAAACTATGCAGACGCTGTGAAGGGCCGATTCACCATCTCCAGAGACAACTCCAAGAACACGCTGTATCTGCAAATGAACAGCCTGAGATCTGAGGACACGGCCGTGTATTACTGTGCGAAAGATA
IGH_mat_scaffold_11_arrow	+	471188	471217	CACAGTG	GACACAAAC	IGHV3-23*01	+	90.8784	48	470890	GAGGTGCAGCTGGTGGAGTCTGGGGGAGGCTTGGTGAAGCCTGGGGCGTCTCTGAGACTTTCCTGTGCCGCCTCTGGATTTACTTTTGATGATTATGCCATGAGCTGGGTCCGCCAGGCTCCAGGGAAGGGGCTGGAGTGGATCTCAGCTATTAGTTGGGATGGTGGTAGCACATACTATGCAAACTCTGTGAAGGGCCGATTCACCATCTCCAGAGACAACTCCAAGAACACGCTGTATCTGCAAATGAACAGCCTGAGATCTGAGGACACGGCCGTGTATTACTGTGCGAAAGATA
IGH_mat_scaffold_11_arrow	+	78097	78126	CACAGTG	GACACAAAC	IGHV3-23*01	+	93.5811	43	77799	GAGATGCAGCTGGTGGAGTCTGGGGGAGGCTTGGTGCAGCCTGGGGGGTCTCTGCGACTCTCCTGTGCAGCCTCTGGATTCACCTTCAGTAGCTATGCCATGGGCTGGGTCCGCCAGGCTCCAGGGAAGGGGCTGGAGTGGATCTCAGCTATTAGTAGTAGTGGTGGTAACACAAACTATGCAGACGCTGTGAAGGGCCGATTCACCATCTCCAGAGACAACTCCAAGAACACGCTGTATCTGCAAATGAACAGCCTGAGATCTGAGGACACGGCCGTGTATTACTGTGCGAAAGATA
IGH_mat_scaffold_11_arrow	+	407165	407194	CACAGTG	GACACAAAC	IGHV4-4*01	+	77.7409	24	406866	CAGGTGCATCTGCAGGAGTCTGGCCCAGGACTGGTGAAGCCACAGCAGACCCTCTCCCTCACCTGTGCTGTCTCTGGATTCTCCATCACAACCAGTGGTTATTGCTGGAGCTGGGTCCGCCAGCCTCCAAGGAAAGACCTAGAGTGGATGGGAATCATATGCTATAATGGTGCCACAGCATATAACCCATCCCTCAAGAGCCACACCTCCATCTCCAGCGACCCGTCCAAGAACCAGTATTCCCTGCAGCTGAGCTCTGTGATCACAGAGGACACAGCCACGTATTACTGTGCGAGAGA
IGH_mat_scaffold_11_arrow	+	277711	277740	CACAGTG	GACACAAAC	IGHV3-23*01	+	92.5676	50	277413	GAGGTGCAGCTGGTGGAGTCTGGGGGAGGCTTGATGCAGCCAGGGGGGTCTCTGCGACTTTCCTGTGCAGCCTCTGGATTCACCTTCAGTAGCTATGGCATGAGCTGGGTCCGCCAGGCTCCAGGGAAGGGGCTGGAGTGGATCTCAAGTATTAGTAGTAGTGGTGGTAACACGTACTATGCAGACTCTGTGAAGGGCCGATTCACCATCTCCAGAGACAACTCCAAGAACACGCTGTATCTGCAAATGAACAGCCTGAGATCTGAGGACACGGCCGTGTATTACTGTGCGAAAGATA
IGH_mat_scaffold_11_arrow	+	343359	343388	CACAGTG	GACACAAAC	IGHV3-23*01	+	92.8814	48	343061	GAGGTGCAGCTGGTGGAGTCTGGGGGAGGCTTGGTGCAGCCTGGGGGGTCTCTGCGACTCTCCTGTGCAGCCTCTGGATTCACCTTCAGTAGCTATAGCATGAGCTGGGTCCGCCAGGCTCCAGGGAAGGGGCTGGAGTGGATCTCAAGTATTAGTAGTAGTGGTGGTAACACGTACTATGCAGACGCTGTGAAGGGCCGATTCACCATCTCCAGAGACAACTCCAAGAACACGCTGTATCTGCAAATGAACAGCCTGAGATCTGAGGACACGGCCGTGTATTACTGTGCGAAAGGTA
IGH_mat_scaffold_11_arrow	+	312296	312326	CACAGTG	CACAAACCT	IGHV4-30-4*02	+	72.093	23	312007	CAGGTGCAGCTGCAGGAGTCGGGACCCAGCCTGGTGAAGCCCTCACAGACCCTCTCCCTCACCTGCACTGTCTCTGGATTCTCATTAACCAGCAGCTGTAGCCTGGGTCCGGCAGGCTCCAGGAAAGGGGCTGGTAGGGTTGGTGCGATGGTTATAGTGGAAGTGCATATTATAACCCAACTCTTAAGTCCCGGCTCAGCATCACCAGGGACACCTCCAAGAGCCAAGTCTACTTATCGCTGAGCAGCCTGACAACTGAGGACACAGCCCTGTATTACTGTGCTAGAGA
IGH_mat_scaffold_11_arrow	+	378545	378574	CACAGTG	GACACAAAC	IGHV4-4*01	+	75.0831	25	378249	CAGGTGCAGCTGCAGGAGTCGGGACCCAGCCTGGTGAAGCCCTCACAGACCCTCTCCCTCACCTGCACTGTCTCTGGATTCTCATTAACCAGCTATGGTGTAGCCTGGGTCCGACAGCCTCCAGGAAAGGGGCTGGAGTGGGTTGGAGGGATATATGGTGGTGGTGGAAGCACAAATTATAACCCAACTCTTAAGTCCCGGCTCAGCATCACCAGGGACACCTCCAAGAGCCAAGTCTACTTATCGCTGAGCAGCCTGACAACTGAGGACACAGCCGTGTATTACTGTGCGAGAGA
IGH_mat_scaffold_11_arrow	+	476908	476937	CACAGTG	GACACAAAC	IGHV4-30-4*02	+	73.9274	25	476615	CAGGTGCAGCTGCAGGAGTCGGGACCCAGCCTGGTGAAGCCCTCACAGACCCTCTCCCTCACCTGCACTGTCTCTGGATTCTCATTAAGCAGCTATGCTGTATCCTGGGTCCGACAGCCTCCAGGAAAGGGGCTGGAGTGGGTTGGTGTGATGGGTAGTGGTGGAAGCGCATATTATAACCCAACTCTTAAGTCCCGGCTCAGCATCACCAGGGACACCTCCAAGAGCCAAGTCTACTTATCGCTGAGCAGCCTGACAACTGAGGACACAGCCGTGTATTACTGTGCGAAAGA
IGH_mat_scaffold_11_arrow	+	84645	84674	CACAGTG	GACACAAAC	IGHV4-30-4*02	+	74.1722	27	84352	CAGGTGCAGCTGCAGGAGTCGGGACCCAGCCTGGTGAAGCCCTCACAGACCCTCTCCCTCACCTGCACTGTCTCTGGATTCTCATTAAGCAGCTATGCTGTAACCTGGGTCCGGCAGGCTCCAGGAAAGGGGCTGGAGTGGTTTGGTGTGATGGGTAGTAGTGGAAGCGCATATTATAACCCAACTCTTAAGTCCCGGCTCAGCATCACCAGGGACACCTCCAAGAGCCAAGTCTACTTATCGCTGAGCAGCCTGACAACTGAGGACACAGCCCTGTATTACTGTGCGAAAGA
IGH_mat_scaffold_11_arrow	+	413119	413148	CACAGTG	GACACAAAC	IGHV4-30-4*02	+	75.0831	26	412827	CAGGTGCAGCTGCAGGAGTCGGGACCCAGCCTGGTGAAGCCCTCACAGACCCTCTCCCTCACCTGCACTGTCTCTGGATTCTCATTAACCAGCACTGCTGTAGCCTGGGTCCGGCAGCTCCAGGAAAGGGGCTGGAGTGGGTTGGGGGGATATATGGTAGTGGAAGCACAGATTATAACCCAACTCTTAAGTCCCGGCTCAGCATCACCAGGGACACCTCCAAGAGCCAAGTCTACTTATCGCTGAGCAGCCTGACAACTGAGGACACAGCCGTGTATTACTGTGCGAGAGA
IGH_mat_scaffold_11_arrow	+	282941	282970	CACAGTG	GACACAAAC	IGHV4-30-4*02	+	72.4252	23	282649	CAGGTGCAGCTGCAGGAGTCGGGACCCAGCCTGGTGAAGCCCTCACAGACCCTCTCCCTCACCTGCACTGTCTCTGGATTCTCATTAACCAGCACTGCTGTAGCCTGGGTCCGGCAGGCTCCAGGAAAGGGGCTGGTAGGGTTGGTGCGATGGGTTATAGTGGAAGTGCATATTATAACCCAACTCTTAAGTCCCGGCTCAGCATCACCAGGGACACCTCCAAGAGCCAAGTCTACTTATCGCTGAGCAGCCTGACAACTGAGGACACAGCCCTGTATTACTGTGCTAGAGA
IGH_mat_scaffold_11_arrow	+	120124	120154	CACAGTG	CACACACCT	IGHV4-38-2*01	+	76.9759	22	119836	CAGGTGCAGTTTCAGGAGTGAGGCCCAGGACTAGTGAAGCCACAGCAGACCCTCTCCCTCACCTGTGCTGTCTCTGGTTACTCCATCACAAGTGGTTATGGTTGGAGCTGGATCAATCAATCCCCAGGGAAGAGGCTGCTGGGGATGGAGAAAATATATGATGATGGGACCACTTACTACAGACCATCCCTCAAGAGCTGCACCTCCGTCTCCAGAGACACTTCCAGGAACCAGTTCTCGTTGAAGCTGAGCTCTGTGACCACCAAGGACTGTGCTGTGTATTACTGT
IGH_mat_scaffold_11_arrow	+	349899	349928	CACAGTG	GACACAAAC	IGHV4-30-4*02	+	73	29	349606	CAGGTGCAGCTGCAGGAGTCGGGACCCAGCCTGGTGAAGCCCTCACAGACCCTCTCTCTCACCTGCACTGTCTCTGGATTCTCATTAACCAGCTATTATGTAGCCTGGGTCCGGCAGGCTCCAGGAAAGGGGCTGGAGTGGGTTGGGGGGATAAATACTGGTGGAAGCGCATATTATAACCCAACTCTTAAGTCCCGGCTCAGCATCACCACGGACACCTCCAAGAGCCAAGTCTACTTATCGCTGAGCAGCCTGACAACTGAGGACACAGCCGTGTATTACTGTGCGAAAGA
IGH_mat_scaffold_11_arrow	+	122151	122180	CACAGTG	GACACAAAC	IGHV3-23*01	+	92.9054	60	121855	GAGGTGCAGCTGGTGGAGTCTGGGGGAGGCTTGGTGCAGCCAGGGGGGTCTCTGTGACTCTCCTGTGCAGCCTCTGGATTCACCTTCAGTAGCGATGCCATGAGCTGGGTCCGCCAAGCTCCAAGGAAGGGGCTGGAGTGGATCTCAGATATTAGTAGTGGGTGGTAGCACATACTATGCAGACTCTGTGAAGGGCCGATTCACCATCTCCAGAGACAACTCCAAGAACACGCTGTATCTGCAAATGAACAGCCTGAGATCTGAGGACACGGCCGTGTATTACTGTGCGAAAGATA
IGH_mat_scaffold_11_arrow	+	320621	320650	CACAGTG	GACACAAAC	IGHV3-23*01	+	89.899	41	320322	GAGGTGCAGCTGGTGGAGTCTGGGGGAGGCTTGGTGAAGCCTGGGGCGTCTCTGCGACTTTCCTGTGCCGCCTCTGGATTTACTTTTGATGATTATGCCATGGCTCTGGGTCCGCCAGGCTCCAGGGAAGGGGCTGGAGTGGATCTCAGCTATTAGTAGTAGTGGTGGTAACACAAACTATGCAGACGCTGTGAAGGGCCGATTCACCATCTCCAGAGACAACTCCAAGAACACGCTGTATCTGCAAATGAACAGCCTGAGATCTGAGGACACGGCCGTGTATTACTGTGCGAAAGATA
IGH_mat_scaffold_11_arrow	+	386747	386776	CACAGTG	GACACAAAC	IGHV3-23*01	+	92.9054	60	386449	GAGGTGCAGCTGGTGGAGTCTGGGGGAGGCTTGGTGAAGCCTGGGGGGTCTCTGCGACTCTCCTGTGCAGCCTCTGGATTCACCTTCAGTAGCTATAGCATGAGCTGGGTCCGCCAGGCTCCAGGGAAGGGGCTGGAGTGGATCTCAGTTATTAGTTGGAACGGTGGTAGCACATACTATGCAGACTCTGTGAAGGGCCGATTCACCATCTCCAGAGACAACTCCAAGAACACGCTGTATCTGCAAATGAACAGCCTGAGATCTGAGGACACGGCCGTGTATTACTGTGCGAAAGATA
IGH_mat_scaffold_11_arrow	+	92725	92754	CACAGTG	GACACAAAC	IGHV3-23*01	+	93.9189	51	92428	GAGGTGCAGCTGGTGGAGTCTGGGGAGGCTTGGTGCAGCCTGGGGGGTCTCTGCGCCTCTCCTGTGCAGCCTCTGGATTCACCTTCAGTAGCTATGCCATGAGCTGGGTCCGCCAGGCTCCAGGGAAGGGGCTGGAGTGGATCTCAGCTATTAGTAGTAGTGGTGGTAACACAAACTATGCAGACTCTGTGAAGGGCCGATTCACCATCTCCAGAGACAACTCCAAGAACACGCTGTATCTGCAAATGAACAGCCTGAGATCTGAGGACACGGCCGTGTATTACTGTGCGAAAGATA
IGH_mat_scaffold_11_arrow	+	125723	125752	CACAGTG	GACACAAAC	IGHV4-4*01	+	75.8278	25	125424	CAGGTGCATCTGCAGGAGTCTGGCCCACGACTGGTGAAGCCACAGCAGACCCTCTCCCTCACCTGTGCTGTCTCTGGATTCTCCATCACAACCAGTGGTTATTGCTGGAGCTGGGTCCGCCAGCCTCCAAGAAAGACCTAGAGTGGACGGGAATCATATGCTATAATGGTGCCACAGCATATAACCCATCCCTCAAGAGCCACACCTCCATCTCCAGCGACCCATCCAAGAAACCAGTATTCCCTGCAGCTGAGCTCTGTGATCACAGAGGACACAGCCACGTATTACTGTGCAAGAGA
IGH_mat_scaffold_11_arrow	+	258096	258125	CACAGTG	GACACACAC	IGHV4-38-2*01	+	76.9759	22	257809	CAGGTGCAGTTTCAGGAGTGAGGCCCAGGACTAGTGAAGCCACAGCAGACCCTCTCCCTCACCTGTGCTGTCTCTGGTTACTCCATCACAAGTGGTTATGGTTGGAGCTGGATCAATCAATCCCCAGGGAAGAGGCTGCTGGGGATGGAGAAATATATGATGATGGGACCACTTACTACAGACCATCCCTCAAGAGCTGCACCTCCGTCTCCAGAGACACTTCCAGGAACCAGTTCTCGTTGAAGCTGAGCTCTGTGACCACCAAGGACTGTGCTGTGTATTACTGT
IGH_mat_scaffold_11_arrow	+	291307	291336	CACAGTG	GACACAAAC	IGHV3-23*01	+	93	41	291005	GAGGTGCAGCTGGTGGAGTCTGGGGGAGGCTTGGTGCAGCCTGGGGGCGTCTCTGCGACTCTCCTGTGCAGCCTCTGGATTTCACCTTTCAGATAGCTATGCCATGGGCTGGGTCCGCCAGGCTCCAGGGAAGGGGCTGGAGTGGATCTCAGCTATTAGTAGTAGTGGTGGTAACACAAACTATGCAGACGCTGTGAAGGGCCGATTCACCATCTCCAGAGACAACTCCAAGAACACGCTGTATCTGCAAATGAACAGCCTGAGATCTGAGGACACGGCCGTGTATTACTGTGCGAAAGATA
IGH_mat_scaffold_11_arrow	+	357926	357955	CACAGTG	GACACAAAC	IGHV3-23*01	+	90.2027	41	357628	GAGGTGCAGCTGGTGGAGTCTGGGGGAGGCTTGGTGAAGCCTGGGGCGTCTCTGCGACTTTCCTGTGCCGCCTCTGGATTTACTTTTGATGATTATGCCATGCTCTGGGTCCGCCAGGCTCCAGGGAAGGGGCTGGAGTGGATCTCAGCTATTAGTAGTAGTGGTGGTAACACAAACTATGCAGACGCTGTGAAGGGCCGATTCACCATCTCCAGAGACAACTCCAAGAACACGCTGTATCTGCAAATGAACAGCCTGAGATCTGAGGACACGGCCGTGTATTACTGTGCGAAAGATA
IGH_mat_scaffold_11_arrow	+	260123	260152	CACAGTG	GACACAAAC	IGHV3-23*01	+	92.9054	61	259828	GAGGTGCAGCTGGTGGAGTCTGGGGGAGGCTTGGTGCAGCCAGGGGGGTCTCTGTGACTCTCCTGTGCAGCCTCTGGATTCACCTTCAGTAGCGATGCCATGAGCTGGGTCCGCCAAGCTCCAAGGAAGGGGCTGGAGTGGATCTCAGATATTAGTAGTGGTGGTAGCACATACTATGCAGACTCTGTGAAGGGCCGATTCACCATCTCCAGAGACAACTCCAAGAACACGCTGTATCTGCAAATGAACAGCCTGAGATCTGAGGACACGGCCGTGTATTACTGTGCGAAAGATA

## Sheet: Californian_sea_lion_mZalCal1
contig	reference strand	heptamer index	nonamer index	heptamer	nonamer	best aligned human gene	alignment direction	alignment PI	longest common k-mer	start of gene	gene sequence
IGH_S6	-	307658	307627	CACAGTG	CAGAAACCC	IGHV1-2*01	+	76.3699	17	307665	CAGGTCCCGATGATACAGTATGGGCTGAGGTGAGGAAACCAGGGACATCCATGAAGTTCTCCTGGAAGATATCTGAATACACCTTCACTGACTACTATTGGGCAATGCATGCAACAGGCCCCAGAACAAGGACTTGAGTGGATGGGGTGAATTGACCTTGAACACAGTGCCACAATTTATGCACCAAAGTTCCATGGCAGAGTCACCGTGATGACAGACATGTCCACTAGCACAGCCTACATGGATCTAAGCAGTCTGAGGTCTGAGGACAAGGCAGGAGTATCATTGTG
IGH_S6	+	262933	262962	CACAGTG	GACACAAAC	IGHV3-30*01	+	85.5219	40	262641	AGGTGCAGCTGGTGGAGTCTGGGGGAGACCTGGTGAAGACTGAGGGGGTCCCTGAGACTCTCCTGTGCAGCCTCTGGATTCATTTTCATTGACTATGGCATGAGCTGGGTCCACCAGGCTCCAGGGAAAGGGCTGCGGTGGGTCGCAGATATTAGCAATGATGGAAGTAGCACATACTATGCAGACTCTGTGAAGGGCCAATTCACCATCTCCAGAGACAACGGCAAGAACATGCTGTCTCTGCAGAACAGCTGAGAGCTGAGGACACGGCCATGTATTACTGTGCCAGTGA
IGH_S6	+	295814	295843	CACAGTG	GACACAAAC	IGHV3-21*01	+	86.4865	44	295518	GAGGTGCAGCTGGTGGAGTCTGGGGGAGACCTGGTGAAGCCTGGGGGGTCCCTGAGACTCTCCTCTGCAGCCTCTGGATTCACCTTCAGTAGTAATGGCATGATCTGGGTCCACCAGGCTCCAGGAAAAGGACTGTAGGGGGTCGCATGGATTAGCAGTGATGGAAGTAGCACAAGGTATGCAGACTCTGTGAAGGGCCGATTCACCATCTCCAGAGACAATGGCAAGAACACATTGTATCTGCAGATGAACAGCCTGAGAGCCGAGGACACGGCTTTGTGTTATTGTGTGAAGGA
IGH_S6	+	99489	99518	CACAGTG	GAAACAAAC	IGHV3-74*01	+	81.7568	34	99193	GAAGTGTAGCTGGTGGAGTCTGGGGGAGACCTGGTGAAGCCTAGGGGGTCCCTGAGACTCTCCTGTGCAGCTTCTGAATTCACTTTCAGTAGGTACTGGATGGGCTGGGTATACCAGGCACGAGGGAACGGGCTGCAGTGAATATCATGGTTTAATCCTGGTGGAAGTAGCACAAGCTATGCAGACTCTGTGAAAGATCTATTTACCATCTCCAGAGACAATGACAAGAACATGATGTATCTGCAGATGAACAGCCTGAGAGCTGAGGACACAGCCATGTATTATTGTGCAAGTGA
IGH_S6	+	203479	203508	CACAGTG	GACACAAAC	IGHV3-21*01	+	91.2458	64	203183	GAGGTGCAGCTGGTGGAGTCTGGGGGAGACCTGGTGAAGCCTGGGGGGTCCCTGAGACTCTCCTGTGCAGCCTCTGGATTCACCTTCAGTAGCTATAGCACGAGCTGGGTCCGCCAGGCTCCAGGGAAGGGGCTGCAGTGGGTCGCATGGATTAAGTATGATGGAAGTAGCACAAACTACGCAGACTCTGTGAAGGGCCGATTCACCATCTCCAGAGACAACGGCAAGAACACGCTGTATCTGCAGATGAACAGCCTGAGAGCCGAGGACACGGCCGTGTATTACTGTGCCAGTGA
IGH_S6	+	251043	251072	CACAGTG	GACACAAAC	IGHV3-23*01	+	90.5405	53	250750	GAGGTGCAGCTGGTGGAGTCTGGGGGAGACCTGGTGAAGCCTGGAGGGTCCCTGAGACTCTCCTGTGCAGCCTCTGGATTCACCTTCAGCAGCTACTACATGAGCTGGGTCCGCCAGGCTCCAGGGAAGGGGCTGCAGTGGGTCGCAGCTATTTACAGTGGTGGTAGCACATATTACTCAGACTCTGTGAAGGGCCGATTCACCATCTCCAGAGACAACGGCAAGAACACGCTGTATCTGCAGATGAACAGCCTGAGAGCCGAGGACACGGCCGTGTATTACTGTGCCAGTGA
IGH_S6	+	218747	218776	CACAGTG	GACACAAAC	IGHV3-21*01	+	92.2297	60	218451	GAGGTGCAGCTGGTGGAGTCTGGGGGAGACCTGGTGAAGCCTGGGGGGTCCCTGAGACTCTCCTGTGCAGCCTCTGGATTCACCTTCAGTAGCTATGGCATGAGCTGGGTCCGCCAGGCTCCAGGGAAGGGGCTGCAGTGGGTCGCAGGTATTAGCAGTAGTGGTAGTAGCACAAACTACGCAGACTCTGTGAAGGGCCGATTCACCATCTCCAGAGACAACGGCAAGAACACGCTGTATCTGCAGATGAACAGCCTGAGAGCCGAGGACACGGCCGTGTATTACTGTGCCAGTGA
IGH_S6	+	325004	325033	CACAGTG	GTCAGAAAC	IGHV1-2*01	+	76.431	19	324708	CAGGTCCCGATGGTGCAGTCTGGGGCTGAAGTGAGGAAGCCAGGCACATCCAGGAAGTTCTCCTGTAAGGCATCTGGATACAAATTCACTGACTACTATATGCACTGGGTGTGAGAGGCCCCAAAACAAGGACTTGAGTGGAAAGGGGTGAATTGACCCTGAAGATGGTGCCACAAGTTATGCACTGAAACTCCAGGGCAGAATCACCGTGATGGCAGACACGGCCAGTAAAACAGCCAACATGCATCTGAGCAGTCTGAGGTTGAGGACACTTACATGTATCACTGTGGGAGAAA

## Sheet: Canadian_lynx_mLynCan4
contig	reference strand	heptamer index	nonamer index	heptamer	nonamer	best aligned human gene	alignment direction	alignment PI	longest common k-mer	start of gene	gene sequence
IGH_scaffold_35_arrow_ctg1	-	256551	256522	CACAGTG	GACACAAAC	IGHV3-21*01	+	88.9273	43	256558	GACGTGCAGCTGGTGGAGTCTGGGGGAGACCTGGTGAAGCCTGGGGGGTCCCTGAGACTCACCTGTGTGGCCTCTGGATTCACCTTCAGTAGCTATGGAATGAGCTGGGTCCGCCAGGCTCCAGGGAAGGGGCTGCAGTGGGTCTCAACAATTAGTAGTAGAGGTAGTACATACTACGCAGACTCCGTGAAGGGCCGATTCACCATCTCCAAAGACAACGCCAAGAACACGCTTTATCTGCAGATGAACAGCCTTAAGACTGAGGACACGGCCACATATTACTGTG
IGH_scaffold_35_arrow_ctg1	-	728609	728580	CACAGTG	GACACAAAC	IGHV3-74*01	+	86.5052	32	728616	GACGTGCAGCTGGTGGAGTCTGGGGGAGACCTGGTGAAGCCTGGGGGGTCCCTGAGACTCACCTGTGTGGCCTCTGGATTCACCTTCAGTGGCTATAGCATACACTGGGTCCGCCAGGCTCCAGGGAAGGGGCTGCAGTGGGTCGCACACATTTATGATGATGGAAGTAGCAGAAGCTACACTGACTCCGTGAAGGGCCAATTCACCATCTCCAGAGACAACTCCAAGAACACGCTGTATCTGCAGATGAACAGCCTGAAGACCGAGGACACGGCCACATATTACTGTG
IGH_scaffold_35_arrow_ctg1	-	580639	580610	CACAGTG	GACACAAAC	IGHV3-23*01	+	89.6194	62	580646	GACGTGCAGCTGGTGGAGTCTGGGGGAGACCTGGCGAAGCCTGGGGGGACCCTGAGACTCACCTGTGTGGCCTCTGGATTCACCTTCAGTAGCTATGGAATGAGCTGGGTCCGCCAGGCTCCAGGGAAGGGGCTGCAGTGGGTCGCAGCAATTAGTGGTAGTGGAGGTAGCACAGGCTACGCAGACTCCGTGAAGGGCCGATTCACCATCTCCAGAGACAACGCCAAGAACACGCTGTATCTGCAGATGAACAGCCTGAAGACCGAGGACACGTCCACATATTACTGTG
IGH_scaffold_35_arrow_ctg1	-	144928	144899	CACAGTG	GACACAAAC	IGHV3-23*01	+	89.2734	49	144935	GACGTGCAGCTGGTGGAGTCTGGGGGAGACCTGGCGAAGCCTGGGGGGTCCCTGAGACTCACCTGTGTGGCCTCTGGATTCACCTTCAGTAGCTATGCAATGAGTTGGGTCCGCCAGGCTCCAGGGAAGGGGCTGCAGTGGGTCGCAGCAATTAGTGGTAGTGGAGGTAGCACAGGCTATGCAGACTCCGTGAAGGGCCGATTCACCATCTCCAGAGACAACGCCAAGAACATGCTGTATCTGCAGATGAACAGCCTCAAGACCGAGGACACGGCCACATATTACTGTG
IGH_scaffold_35_arrow_ctg1	-	309265	309235	CACAGTG	CACAAACCG	IGHV1-24*01	+	82.9861	26	309272	CAGGTTTTGCTGGTGCAGTCTGGGGCTGAAGTGAGGAAGCCTGGGGCATCAGTGAAGACCTTCTGCAAAGCATCTGGATACAGCTTCACTGATTACTATATGCACTGGGTGCGACAGGCGCCTGCACAAGGGTTTGAGTGGATGGGAAGCATTGACCCTGAAGATGGTTCTACAAGGTATGCACAGAAGTTCCAGGGCAGACTCACCCTGACAGCAGACAGATCCACAAACACAGCCTACATGGAGCTAAGCAGTCTGAGGTCTGCAGACACGGCCGTGCATTACTGT
IGH_scaffold_35_arrow_ctg1	-	301575	301546	CACAGTG	GACACAAAC	IGHV1-24*01	+	79.8611	23	301582	CAGGATTTAATGGTGCATCTGGGGCTCAAGTGAGGAAGCCTGGGGCATCAGTGAAGACCTTCTGCAAAGCATCTGGATACAGCTTCACTGATTACTATATGCACGGGTGCGACAGACTCCTGCACAAGGGCTTGAGTGGATGGGAAGCATTGACCCTGAAGATGGTGCTACAAGTAATGCACAGACGTTCCAGGGCAGACTCACTCTGATGGCAGACACATCCACAAACACAGCGTACATGGAACTAAGCAGTCTGAGGTCTGCAGACACAGCCGTGTATTACTGT
IGH_scaffold_35_arrow_ctg1	-	692736	692707	CACAGTG	GACACAAAC	IGHV3-69-1*01	+	86.1592	39	692743	GACGTTCAGCTGGTGGAGTCTGGGGGAGACCTGGTGAAGCCCGGGGGGTCCCTGAGACTCACCTGTGTGGCCTCTGGATTCACCTTCAGTGACTACAACATGGACTGGGTCCGCCAGGCTCCAGGAAAGGGGCTGCAGTGGGTCGCGTATATTAGTAGTAGTGGAGGTAGCACAAGCTACGAAGACTCCGTGAAGGGCCGATTCACCATCTCCAGAGACAACTCCAAGAACACGCTGTATCTGCAGATGAACAATCTCAAGACCGAGGACACGGCCACATATTACTGTG
IGH_scaffold_35_arrow_ctg1	-	91641	91611	CACAGTG	CACAAACCG	IGHV1-24*01	+	83.3333	26	91648	CAGGTTTTGCTGGTGCAGTCTGGGGCTGAAGTGAGGAAGCCTGGGGCATCAGTGAAGATCTTCTGCAAAGCATCTGGATACAGCTTCACTGATTACTATATGCACTGGGTGCGACAGGCTCCTGCACAAGGGTTTGAGTGGATGGGAAGAATTGACCCTGAAGATGGTTCTACAAGTATGCACAGAAGTTCCAGGGCAGACTCACTCTGATGGCAGACACATCCACAAACACAGCCTACATGGAGCTAAGCAGTCTGAGGTCTGCAGACACAGCCGTGTATTACTGT
IGH_scaffold_35_arrow_ctg1	-	362995	362966	CACAGTG	GACACAAAC	IGHV3-23*01	+	89.2734	49	363002	GACGTGCAGCTGGTGGAGTCTGGGGGAGACCTGGCGAAGCCTGGGGGGTCCCTGAGACTCACCTGTGTGGCCTCTGGATTCACCTTCAGTAGCTATGGAATGAGTTGGGTCCGCCAGGCTCCAGGGAAGGGGCTGCAGTGGGTCACAGCAATTAGTGGTAGTGGAGGTAGCACAGGCTACGCAGACTCCGTGAAGGGCCGATTCACCATCTCCAGAGACAACGCCAAGAACATGCTGTATCTGCAGATGAACAGCCTCAAGACCGAGGACACGGCCACATATTACTGTG
IGH_scaffold_35_arrow_ctg1	-	413085	413056	CACAGTG	GACACAAAC	IGHV1-24*01	+	80.2083	23	413092	CAGGATTTAATGGTGCATCTGGGGCTCAAGTGAGGAAGCCTGGGGCATCAGTGAAGACCTTCTGCAAAGCATCTGGATACAGCTTCACTGATTACTATATGCACGGGTGCGACAGACTCCTGCACAAGGGCTTGAGTGGATGGGAAGCATTGACCCTGAAGATGGTGCTACAAGTAATGCACAGAAGTTCCAGGGCAGACTCACTCTGATGGCAGACACATCCACAAACACAGCGTACATGGAACTAAGCAGTCTGAGGTCTGCAGACACAGCCGTGTATTACTGT
IGH_scaffold_35_arrow_ctg1	-	959837	959808	CACAGTG	GACACAAAC	IGHV3-23*01	+	90.3114	56	959844	GACGTGCAGCTGGTGGAGTCTGGGGGAGACCTGGTGAAGCCTGGGGGGTCCCTGAGACTCACCTGTGTAGCCTCTGGATTCACCTTCAGTAGCTATGAAATGAACTGGGTCCGCCAGGCTCCAGGGAAGGGGTTGCAGTGGGTCGCATATATTAGTAGTAGTGGAGGTAGCACATACTACGCAGACTCCGTGAAGGGCCGATTCACCATCTCCAGAGACAACTCCAAGAACACGCTGTATCTGCAGATGAACAACCTGAAGACCGAGGACACGGCCACATATTACTGTG
IGH_scaffold_35_arrow_ctg1	-	289094	289065	CACAGTG	CACACAAAC	IGHV3-23*01	+	88.9273	62	289101	GACGTGCAGCTGGTGGAGTCTGGGGGAGACCTGGTGAAGCCTGGGGGGTCCCTGAGACTCACCTGTGTGGCCTCTGGATTCACCTTCAGTAGCTACTACATGAGCTGGGTCCGCCAGGCTCCAGGGAATGGGCTGCAGTGGGTCGCGTATATTAGTAGTAGTGGAGGTAGCACAAGCTACGCAGACTCCGTGAAGGGCCGATTCACCATCTCCAGAGACAACGCCAAGAACACGCTGTATCTGCAGATGAACAGCCTGAAGACCGAGGACACGGCCACATATTACTGTG
IGH_scaffold_35_arrow_ctg1	-	400608	400579	CACAGTG	CACACAAAC	IGHV3-66*02	+	87.5862	46	400615	GACGTGCAGCTGGTGGAGTCTGGGGGAGACCTGGTGAAGCCTGGGGGGTCCCTGAGACTCACCTGTGTGGCCTCTGGATTCACCTTCAGTAGCTACTACATGAGCTGGGTCCGCCAGGCTCCAGGGAAGGGGCTGCAGTGGGTCGCAAATATTTATACTGATGGAAGTAGCACATACTACGAAGACTCCGTGAAGGGCTGATTCACCATCTCCAGAGACAACGCCAAGAACACGCTGTATCTGCAGATGAACAGCCTGAAGACCGAGGACACGGCCACATATTACTGTG
IGH_scaffold_35_arrow_ctg1	-	471733	471704	CACAGTG	GACACAAAC	IGHV3-23*01	+	88.9273	53	471740	GACGTGCAGCTGGAGGAGTCTGGGGGAGACCTGGTGAAGCCTGGGGGGTCCCTGAGACTCACCTGTGTAGCCTCTGGATTCACCTTCAGTAGCTATGCAATGCACTGGGTCCGCCAGGCTCCAGGGAAGGGGCTGCAGTGGGTCGCAGCAATTAGTAGTGGAGGTAGCACATACTACCCAGACTCCGTGAAGGGCCGATTCACCATCTCCAGAGACAACGCCAAGAACACGCTTTATCTGCAGATGAACAGCCTCAAGACCGAGGACACGGCCACATATTACTGTG
IGH_scaffold_35_arrow_ctg1	-	155825	155796	CACAGTG	GACACAAAC	IGHV3-23*01	+	89.2734	49	155832	GACGTGCAGCTGGTGGAGTCTGGGGGAGACCTGGCGAAGCCTGGGGGGTCCCTGAGACTCACCTGTGTGGCCTCTGGATTCACCTTCAGTAGCTATGCAATGAGCTGGGTCCGCCAGGCTCCAGGGAAGGGGCTGCAGTGGGTCGCAGAAATTAGTAGTAGTGGAGGTAGCACATACTATGCAGACTCCGTGAAGGGCCGATTCACCATCTCCAGAGACAACGCCAAGAACATGCTGTATCTGCAGATGAACAGCGTGAAGACCGAGGACACTGCCACATATTACTGTG
IGH_scaffold_35_arrow_ctg1	-	499864	499835	CACAGTG	CACACAAAC	IGHV3-23*01	+	87.8893	57	499871	GACGTGCAGCTGGTGGAGTCTGGGGGAGACCTGGTGAAGCCTGGGGGGTCCCTGAGACTCACCTGTGTGGCCTCTGGATTCACCTTCAGTAGCTACTACATGTACTGGGTCCGACAGGCTCCAGGGAAGGGGCTGCAGTGGGTCGCGTATATTAGTAGTAGTGGAGGTAGCACAAGCTACGCAGACTTCGTGAAGGGCCGATTCACCATCTCCAGAGACAACGCCAAGAACACGCTGTATCTGCAGATGAACAGCCTGAAGACCGAGGACACGGCCACATATTACTGTG
IGH_scaffold_35_arrow_ctg1	-	857733	857704	CACAGTG	GACACAAAC	IGHV3-21*01	+	87.5433	62	857740	GATGTGCAGCTGGTGGAATCTGGGGGAGACCTGGTGAAGCCTGGGGGGTCCCTGAGACTCACCTGTTTAGCCTCTGGATTCACCTTCAGTAGCAACAGCATGAACTGGGTCCGCCAGGCTCCAGGGAAGGGGCTGCAGTGGGTTGCATATATCAGATATGATGGAAGTAGCACATACTACGCAGACTCCGTGAAGGGCCGATTCACCATCTCCAGAGACAACGCCAAGAACACGCTGTATCTGCAGATGAACAGCCTGAAGACCGAGGACACGGCCACATATTACTGTG
IGH_scaffold_35_arrow_ctg1	-	980592	980563	CACAGTG	GACACAAAC	IGHV1-24*01	+	83.2753	21	980599	AGGTTTTGCTGGTGCAGTCTGGGGCTGAAGTGAGGAAGCCTTGGGCATCAGTGAAGATCTTCTGCAAAGTATTTGGATACAGCTTCACTGATTACTACATGCACTGGATGCTACAGGCTCCTGCACAAGGGTTTGAGTGGATGGGAAGCATTGACCCTGAAGATGGTGCTACAAGCTATGCACAGAAGTTCCAGGGCAGACTCACTCTGACGGCAGACACATCCACAAACACAGCCTACATGGAGCTAAGCAGTGTGAGGTCTGCAGACACGGCCATGTATTACTGT
IGH_scaffold_35_arrow_ctg1	-	513113	513084	CACAGTG	GACACAAAC	IGHV1-24*01	+	83.6806	25	513120	CAGGTTTTGCTGGTGCAGTCTGGGGCTGAAGTGAGGAAGCCTGGGGCATCAGTGAAGATCTTCTGTAAAGCATCTGGATACAGCTTCACTGATTACTATATGTACTGGGTGCGACAGGCTCCTGCACAAGGGTTTGAGTGGATGGGAAGAATTGACCCTGAAGATGGTTCTACAAGCTATGCACAGAAGTTCCAGGGCAGACTCACCCTGACAGCAGACACATCCACAAACACAGCCTACATGGAGCTGAGCAGTCTGAGGTCTACAGACACGGCCGTGCATTACTGT
IGH_Super_Scaffold_2	-	146048864	146048835	CACAGTG	GTCACAAAC	IGHV4-30-2*01	+	76.0274	28	146048871	CAACTTACACTTCGGGAGTCCGGCCCAGGACTGGTGAAGCCTTCACAATCCCTCTCTCTCACCTGCGTTGTCTCCGGAGGCTCCGTTACCAGCAGTTACTACTGGAACTGGATCCGCCAGCGCCCTGGGAGAGGGTTGGAGTGGCTGGGGTACTGGTCAGGTAGCACCAGCTACAACCCGGCTTTCCAGGGCCGCATCTCCATCACTGCTGACACAGCCCAGAGCCAGTTCTCCCTGCAGCTGAGCTCCATGACCACCGAGGACACGGCCGTGTATTACTGTG
IGH_Super_Scaffold_2	-	146081229	146081200	CACAGTG	CACACAAAC	IGHV3-21*01	+	86.8512	62	146081236	GACGTGCAGCTGGTGGAGTCTGGGGGAGACCTGGTGAAGCCTGGGGGGTCCCTGAGACTCACCTGTGTGGCCTCTGGATTCACCTTCAGTAGTTCCAGCATGAGCTGGGTCCGCCAGGCTCCAGGGAAGGGGCTGCAGTGGGTCGCATACATTTATGATGATGGAAGTGGCACAAGCTACGCAGACTCCGTGAAGGGCCGATTCACCATCTCCAGAGACAACGCCAAGAACACGCTGTATCTGCAGATGAACAGCCTCAAGACCGAGGACACGGCCACATATTACTGTG

## Sheet: common_marmoset_mCalJac1_matern
contig	reference strand	heptamer index	nonamer index	heptamer	nonamer	best aligned human gene	alignment direction	alignment PI	longest common k-mer	start of gene	gene sequence
IGH_Super_scaffold_mat_10	+	86703816	86703846	CACAGTG	CAGAAAACT	IGHV1-3*01	+	85.8108	39	86703529	CAGGTGCAGCTGGTGCAGTTGGGGGCTGAGGTGAAGAAACCTGGGTCATTAGTGAAGGTCTCCTGCAAGGCTTCTGGATACACCTTCACTAGCAATGCTATGCACTGGGTGTGACAGGCCCCTGGCCAAGGGCTTGAATAAATGGGATGGATCAACCCTGGTAATGGTAACACAAAGTACACACAGAAGTTCCAGGGCAGAGTCACCATGAACAGGGACACATCCACGAAGACAGCCTACATGGAGCTGAGACCTGAGGACATAGCCGTGTATTACTGTGTGAGAGA
IGH_Super_scaffold_mat_7	+	9910959	9910988	CACAGTG	GACAAAAAT	IGHV3-43*01	+	84.9498	32	9910682	GAGGTGCAGCTGGTGAAGTCTGGGGGAGGCGTGGTCCAGCCTGGGGGGTTCCCTGAGACTCACCTTTGATGATTATGCCATGCACTGGGTCCGCCAAGCTCCAGGGAAGGGTCTGGAGTGGGTCTGCTATTAGTTGGGGTGGTGGTAGCACATGATATCCAGACTCTGTGAGGGGTTGATTCACCATCTCCAAAGACAACAGCAAAAACTCCGTGTATCTGCAAATGAAACAGTCTGAGAGCTGAGGACACAGCCTTGTATTACTATGCCAAAGATA
IGH_Super_scaffold_mat_7	+	9916967	9916998	CACAGTG	CAGAAACCC	IGHV1-46*01	+	89.1892	34	9916672	CAGGTACAGCTGGTGCAGTCTGGGGCTGAGGTGAGGAAGCCTGGGTCCTCAGCGAGGGTCTCCTGCAAGGCTTCTGGATACACTTTCACCAGCTACTATATGCACTGAGTGCACCAGGCCCTTGGACAAGGGCTTGAGAGGATGATATTGATCAACCCTAGCAACGGTAACACAAACTACGCACAGAAGTTCCAGGGCAGAGTCACTATTACCAGGGACACATCACGAGCACAGCCTACACGGAGCTGAGCAGCCTGAGAGCTGAGGACATGGCCATGTATTACTGTGCGAGAGA
IGH_mat_scaffold_127_arrow_ctg1	-	19935	19905	CACAGTG	CAGAAACCC	IGHV1-18*01	+	89.9654	55	19942	CAGGTGCAGCTGGTCCAGTCTGGGGCTGAGGTGCAGAAGCCTGGGGCCTCAGTGAAGGTCTCCTGCAAGGCTTCCGGATACACCTTCACCAGCTATACTATCAGCTGGGTGCGACAAGCCCCTGGACAAGGGCTTGAGTGGATGGGATGGATCTACCCTGGTAGTGGTAACACAAACTATGCACAGAAGTTCCAGGGCAGAGTTACCATGACCGCGGACAAGTCCACGAGCACAGCCTACATAGAGCTGAGCAGCCTGAGATCTGAGGACACTGCTGTGTATTACTGTG
IGH_mat_scaffold_127_arrow_ctg1	-	63774	63744	CACAGTG	CAGAAACCC	IGHV1-18*01	+	89.6552	51	63781	CAGGTGCAGCTGGTGCAGTCTGGGGCTGAGGTGAGGAAGCCTGGGGCCTCAGTGAAAGTCTCCTGCAAAGCTTCTGGTTACACCTTTACCAGCCATGGTATCAGCTGGCTGCAACAGGCCCCTGGACAAGGGCTTGAGTTGGTAGGATGGATCCACCCTAACAGTGGTGACACAGGCTATGCACAGAAGTTCCAGGGCAGAGTCACCATGACCAGGGACACATCCGCGAGCACAGCCTACATGGAGCTGAGCAGCCTGAGACCTGAGGACATGGCCAGGTATTACTGTGCA
IGH_mat_scaffold_127_arrow_ctg1	-	39453	39424	CACAGTG	GACACAAAC	IGHV3-25*01	+	87.1972	42	39460	GAGGTGCAGCTGGTGGAGTCTGGGGGAGGCTTGGTTCAGCCCGGGGGGGTCCCTGAGACTCACCTGTGCAGCCTCTGGATTCACCTTCAGTAACTACTGGATGAACTGGGTCCGCCAGGCTCCAGGGAAGGGGCTGGAGTGGATTGGACAAATTAATCCTAATGGAGGTAGCACATACCTCACAGACTCCGTGAAGGGCCGGTTCACCATCTCCAGAGACAACGCCAAGAACACGCTTCATCTACGAATGAACCGCCTGAAAACCGAGGACGCGGCCATGTATTACTGTG
IGH_mat_scaffold_127_arrow_ctg1	-	30069	30040	CACAGTG	GACACAAAC	IGHV3-69-1*01	+	92.1233	51	30076	GAGGTGCAGCTGCTGGAGTCTGGGGGAGGATTGGTTCAGCCCGGGAGGTCCCTGAGACTCTCCTGTGCAGCCTCTGGATTCACCTTCAGTGACTACCGGATGAATTGGGTCCGCCAGGCTCCAGGGAAGGGGCTGGAGTGGGTCTCATACATTAGTAGTGGCAGTGGTGGTACCACATACTACGCAGACTCCGTGAAGGGCCGATTCACCATCTCCAGAGACAACGCCAAGAACTCGCTGTATCTGCAGATGAACAGCCTGAGAGCCGAGGACACGGCCGTGTATTACTGTG
IGH_mat_scaffold_127_arrow_ctg1	-	51283	51253	CACAGTG	CAGAAACCC	IGHV1-46*01	+	89.9654	55	51290	CCACTCCAGCTGGTGCAGTCTGGGGCTGACGTGAAGAAGCCTGGGTCCTCCATGAAGGTCTCCTGCAAGGCGTCTGGATACACCTTCACCGACTACTACATGAATTGGGTGTAACAGGCCCCTGGACAAGGGCTCGAGTGGATGGGAGAGATCTACACTAGTAGTGGTGGCACAGGCTATGCACAGAAGTTCCAGGGCAGAGTCACCATGACCAGGGACACGTCCACGAGCACAGCCTACATGGAGCTGAGCAGCCTGAGACCTGAGGACACGGCCGTGTATTACTGTG
IGH_mat_scaffold_127_arrow_ctg1	-	5782	5753	CACAGTG	GACACAAAC	IGHV3-21*01	+	90.9408	44	5789	GAGGTGCAGCTGGTGGAGTCTGGGGAGGCTTGGTTCAGCCTGGGGGGTGCCTGAAACTCTCCTGTGCAGCTTCTGGATTCACCTTCAGTAACTATCGCATGAGCTGGGTCCGCCAGGCTCCCGGAAAGGGGCTGGAGTGGGTCTCATACATTAATAGTATGGTACCGCATACTACGCAGACTCGGTGAAGGGCCGATTCACCATCTCCAGAGACAACGCCAAGAACTCGCTGTATCTGCAGATGAACAGCCTGAGAGCCGAGGACACGGCCGTGTATTACTG
IGH_Super_scaffold_mat_12	-	136481114	136481084	CACAGTG	CAGAAACCC	IGHV1-69*02	+	90.3114	50	136481121	CAGGAGCAGCTGGTGCAGTCTGGGGCTGAGGCGAAGAAGCCTGGGGCCTCAGTGAAGGTCTCCTGCAAGGCTTCTGGATACAGCTTCACCAGCTATGCTATCAGCTGGGTGCGACAGGCCCCTGGACAAGGGCTCGAGTGGATGGGAGTGATTATCCCTTTAGTTGGTGTCACGAACTATGCACAGAAGTTCCAGGGCAGAGTCACCATGACCGCAGACACATCCACAAGCACAGCGTACATGGAGCTGAGCAGCCTGAGACCTGAGGACACAGCCGTGTATTACTGTG
IGH_Super_scaffold_mat_12	-	136415549	136415520	CACAGTG	GACACAAAC	IGHV4-28*01	+	94.7735	67	136415556	CAGGTGCAGCTGCAGGAGTCGGGCCCAGGACTGGTGAAGCCTTCGGAGACCCTGTCCCTCACCTGCGCTGTCTCTGGTTACTCCATCAGCAGTGGTTACTGGTGGAGCTGGATCCGCCAGCCTCCAGGGAAGGGGCTGGAGTGGATTGGGTACATCTATCATAGTGGGAGCACCTACTACAACCCGTCCCTCAAGAGTCGAGCCACCATATCAGCAGACACGTCCAAGAACCAGTTCTCCCTGAGACTGAGCTCTGTGACCGCCGCGGACACGGCCGTGTATTACTG
IGH_Super_scaffold_mat_12	-	136579384	136579355	CACAGTG	GACACAAAC	IGHV3-7*01	+	91.6376	48	136579391	GAGGTGCAGCTGGTGGAGTCTGGGGGAGGCTTGGTTCAGCCTGGGGGGTCCCTGAGACTCTCCTGTGCAGCTTCTGGATTCACGTTCAGTGACTACAGGATGTACTGGGTCCGCCAGGCTCCGAGTAAGGGGCTGGAGTGGGTGGCCAACATAAAGTATGATGGAGGTGAAAAATACTAAGCAGACTCCGTGAAGGGCCGATTCACCATCTCCAGAGACAACGCCAAGAACTCGCTGTATCTGCAGATGAACAGCCTGAGAGCCGAGGACACGGCCGTTTATTACTG
IGH_Super_scaffold_mat_12	-	136775978	136775949	CACAGTG	GACACAAAC	IGHV3-48*01	+	90.9408	44	136775985	GAGGTGCAGCTGGTGGAGTCTGGGGGAGGCTTGGTTCAGCCTGGGGGGTGCCTGAAACTCTCCTGTGCAGCTTCTGGATTCACCTTCAGTAACTATCTTATGAGCTGGGTCCGCCAGGCTCCCGGAAAGGGGCTGGAGTGGGTCTCATACATTAATAGTGATGGTACCGCATACTACGCAGACTCGGTGAAGGGCCGATTCACCATCTCCAGAGACAACGCCAAGAACTCGCTGTATCTGCAGATGAACAGCCTGAGAGCCGAGGACACGGCCGTGTATTACTG
IGH_Super_scaffold_mat_12	-	136612137	136612108	CACAGTG	GACACAAAC	IGHV3-74*01	+	90.3114	53	136612144	GAGGTGCAGCTGGTGGAGTCTGGGGAGGCTTGGTTCAGCCCGGGGTCCCTGAGACTCTCCTGTGCAGCCTCTGGATTCACCTTCAGTAACTACTGGATGAATTGGTTCCGCCAGGCTCCGGGAAGGGGCTGGAGTGGGTCTCACTATCAATATGATGGGGAGCACATACTACGCAGACTCCGTGAAGGGCCGATTCACCATCTCCAGAGACAACCAGAACTCGCTGTATCTGCAGATGAACAGCCTGAGAGCCGAGGACACGGCCGTGTATTACTGTG
IGH_Super_scaffold_mat_12	-	136808133	136808104	CACAGTG	GACACAAAC	IGHV3-21*01	+	91.6376	59	136808140	GAGGTGCAGCTGGTGGAGTCTGGGGGAGGCTTGGTTCAGCCCAGGGGGTCCCTGAGACTCTCCTGTGCAGCCTCTGGATTCACCTTCAGCAGCTATAGCATGAATTGGGTCCGCCAGGCTCCAGGGAAGGGGCTGGAGTGGGTTTCATACATTAGATATGATGGTGGTAGCACATACTACGCAGACTCCGTGAAGGGCCGATTCACCATCTCCAGAGACAACGACAAGAACTCGCTGTATCTGCAGATGAACAGCCTGAGAGCCGAGGACACGGCCGTGTATTACTG
IGH_Super_scaffold_mat_12	-	136512189	136512160	CACAGTG	GACACAAAC	IGHV3-69-1*01	+	92.0415	48	136512196	GAGGTGCAGCTGGTGGAGTCTGGGGGAGGTTTGGTTCAGCCCGGGGGGTCCCTGAGACTCTCCTGTGCGGCCTCTGGATTCACCTTCAGTAACTACTACATGAGCTGGGTCCGCCAGGCTCCAGGCAAGGGACTGGAGTGGGTCTCATACATTAGTTATGATGGTGGTAGCACAAACTACGCAGACTCCGTGAAGGGCCGATTCACCATCTCCAGAGACAACGCCAAGAACTCGCTGTATCTACAGATGAACAGCCTGAGAGCCGAGGACACGGCCGTGTATTACTGTG
IGH_Super_scaffold_mat_12	-	136313838	136313808	CACAGTG	CAGAAACCC	IGHV1-46*01	+	92.0415	50	136313845	CAGGTGCAGCTGGTGCAGTCTGGGGCTGAGGTGAAGAAGCCTGGGGCCTCCGTGAAGGTCTCCTGCAAGGCTTCCGGATATACCTTCACTGACTACTACATGCACTGGGTGCGACAGGCCCCTGGACAAGGGCTCGAGTGGATGGGATGGATCTACCCTGGTAATGGTAACACAAAGTACGCACAGCAGTTCCAGGGCAGAGTCACCATGACCAGGGACACGTCCACGAGCACAGCCTACATGGAGCTGAGCAGCCTGAGACCTGAGGACACGGCCGTGTATTACTGTG
IGH_Super_scaffold_mat_12	-	136344104	136344075	CACAGTG	GACACAAAC	IGHV3-72*01	+	91.8367	36	136344111	GAGGTGCAGCTGGTGGAGTCTGGGGGAGGCTTGGTTCAGCCCGGGGGGTCCCTGAGACTCTCCTGTGCGGCCTCTGGATTCACCTTCAGTGACTACTACATGGAGTGGGTCCGCCAGGCTCCGGGGAAGGGGCTGGAGTGGGTAGGTTTTATTAGAAACAAAGCCAATGGTGGGACAGCAGAATACGCCGCGTCTGTGAAAGGCCGATTCACCATCTCAAGAGATGATTCAAAGAACTCGCTGTATCTGCAAATGAGCGGCCTGAAAACCGAGGACACGGCCGTGTATTACTGTA
IGH_Super_scaffold_mat_12	-	136638892	136638862	CACAGTG	CAGAAACCC	IGHV1-46*01	+	92.7336	62	136638899	CAGGTGCAGCTGGTGCAGTCTGGGGCTGAGGTGAAGAAGCCTGGGGCCTCCGTGAAGGTCTCCTGCAAGGCTTCTGGATACACCTTCACCAGCTACTATATGCACTGGGTGCGACAGGCCCCTGGACAAGGGCTCGAGTGGATGGGACGTATTGATCCTGAAGATGGTAGTACAAGCTACGCACAGAAGTTCCAGGGCAGAGTCACCATGACCGCAGACACATCCACGAGCACAGCCTACATGGAGCTGAGCAGCCTGAGACCTGAGGACACGGCCGTGTATTACTGTG
IGH_Super_scaffold_mat_12	-	136802120	136802090	CACAGTG	CAGAAATCC	IGHV1-69*02	+	89.9654	39	136802127	CAGGTGCAGCTGGTACAGTCTGGGCCTGAGGTGAAGAAGCCTGGGGCCTCCGTGAAGGTCTCCTGCAAGGCTTCTGGATACACCTTCACCAGCTATATTATCAGCTGGGTGCGACAGGCCCCTGGACAAGGGCTCCAGTGGATGGGATGGATCTACCCTGGTAATGGTAACACAAAGTACACACAGAAGTTCCAGGGCAGAGTCACCATGACCGCGGACAAGTCCACGAGCACAGCCTACATGGAGCTGAGCAGCCTGAGACATGAGGACACGGCCGTGTATTACTGTG
IGH_Super_scaffold_mat_12	-	136900212	136900183	CACAGTG	AACACAAAC	IGHV3-23*01	+	91.6955	52	136900219	GAGGTGCAGCTGGTGGAGTCTGGCGGACGCTTGGTTCAGCCTGGGGGGTCCCTGAGACTCTCCTGTGCGGCCTCTGGATTCACATTCAGTAGCTACGCCATGGCCTGGGTCCGCCAGGCTCCGGGGAAGGGGCTGGAGTGGGTCTCAGCCATTAGTAGTGGTGGCACATACTACGCAGACTCCGTGAAGGGCCGATTCACCATCTCCAGAGACAACGCCAAGAACTCGCTGTATCTGCAGATGAACAGCCTGAGAGCCGAGGACACGGCCGTGTATTACTGTG
IGH_Super_scaffold_mat_12	-	136604096	136604067	CACAGTG	GTCAGAAAC	IGHV1-46*01	+	91.6955	52	136604103	CAGGTGCAGCTGGTGCAGTCGGGGGCTGAGGTGAAGCAGCCTGGGGCCTCAGTGAAGGTCTCCTGCAAGGCTTCTGGATACACCTTCACTAGCTACTGTATGAACTGGGTGCGACAGGCCCATGCACAAGGGCTTGAATGGATGGGATACATGTGCCCTGGTGATGGCAGCACAAACTACGCACAGAAGTTCCAGGGCAGAGTCACCATGACCAGGGACACATCCACAAGCACAGCCTACATGGAGCTGAGCAGCCTGAGACCTGAGGACACGGCCGTGTATTACTGTG
IGH_Super_scaffold_mat_12	-	136374337	136374308	CACAGTG	GACACAAAC	IGHV3-15*01	+	90.1695	51	136374344	GAGGTGCAGCTGGTGGAGTCTGGGGGAGGCTTGGTTCAGCCCGGGGGGTCCCTGAGACTCTCCTGTGCAGCCTCTGGATTCACCTTCAGTAACTACTGGATGAGCTGGGTCCGCCAGGCTCCGGGGAAGGGGCTGGAGTGGGTAGGTTTAATCAAAAGCAAAGCCAATGGTGGGACAGCAGAATACGCGGCGTCTGTGAAAGGCCGATTCACCATCTCAAGAGATGATTCAAAGAACTCGCTGTATCTGCAAATGAGCGGCCTGAAAACCGAGGACACGGCCGTGTATTACTGTA
IGH_Super_scaffold_mat_12	-	136734574	136734545	CACAGTG	GACACAAAC	IGHV3-23*01	+	92.4138	48	136734581	GAGGTGCAGCTGGTGGAGTCTGGGGGGGGGCTTGGTTCAGCCCGGGGGGTCCCTGAGACTCTCCTGTGCAGCCTCTGGATTCACCTTCAGCAGCTATGACATGCACTGGGTCCGCCAGGCTCCAGGGAAGGGGCTGGAGTGGGTCTCATACTTTAGTTATAATGGTGGTAGCACAAACTACGCAGACTCCGTGAAGGGCCGATTCACCATCTCCAGAGACAACGCCAAGAACTCGCTGTATCTGCAGATGAACAGCCTGAGAGCCGAGGACACGGCCGTGTATTACTGTG
IGH_Super_scaffold_mat_12	-	136668946	136668917	CACAGTG	GACACAAAC	IGHV3-69-1*01	+	93.4256	53	136668953	GAGGTGCAGCTGGTGGAGTCTGGGGGAGGCTTGGTTCAGCCCGGGGGGTCCCTGAGACTCTCCTGTGCGGCCTCTGGATTCACCTTCAGTAACTACTACATGAGCTGGGTCCGCCAGGCTCCAGGGAAGGGGCTGGAGTGGGTCTCATACATTAGTTATGATGGTGGTAGCACGTACTACGCAGACTCCGTGAAGGGCCGATTCACCATCTCCAGAGACAACGCCAAGAACTCGCTGTATCTGCAGATGAACAGCCTGAGAGCCGAGGACACGGCCGTGTATTACTGTG
IGH_Super_scaffold_mat_12	-	136471474	136471444	CACAGTG	CAGAAACCC	IGHV1-2*01	+	94.1176	55	136471481	CAGGTGCAGCTGGTGCAGTCTGGGGCTGAGGTGAAGAAGCCTGGGGCCTCCGTGAAGGTCTCCTGCAAGGCTTCCGGATACACCTTCACCGACTACTACATGCAGTGGGTGCGACAGGCCCCTGGACAAGGGCTTGAGTGGATGGGATGGATCAACCCTAGTAGTGGTAGCACAAACTATGCACAGAAGTTCCAGGGAAGAGTCACCATGACCAGGGACACGTCCACAAGCACAGCCTACATGGAGCTGAGCAGCCTGAGATCTGAGGACACGGCTGTGTATTACTGTG
IGH_Super_scaffold_mat_12	-	136569638	136569609	CACAGTG	GACACAAAC	IGHV3-74*01	+	92.3875	56	136569645	GAGGTGCAGCTGGTGGAGTCTGGGGGAGGCTTGGTTCAGCCCGGGGGTCCCTGAGACTCTCCTGTGCAGCCTCTGGATTCACCTTCAGTAACTACTGGATGAATTGGGTCCGCCAGGCTCCGGGGAAGGGGCTGGAGTGGGTCTCAGCTATCAATACTGATGGGGGTAGCACATACTACGCAGACTCCGTGAAGGGCCGATTCACCATCTCCAGAGACAACGCCAAGAACTCGCTGTATCTGCAGATGAACAGCCTGAGAGCCGAGGACACGGCCGTGTATTACTGTG
IGH_Super_scaffold_mat_12	-	136831610	136831580	CACAGTG	CTAAAACCC	IGHV5-51*01	+	89.2734	38	136831617	GAGGTGCAGCTGGTGCAGTCTGGAGCAGAGGTGAAAAGGCCCGGGGAGTCGCTGAAGATCTCCTGTAGGGCTTCTGGCTTTACTGTCAACTGGATCAGCTGGGTGCGACAGATGCCCGGGAAAGGCCTGGAGTGGATGGGGAGTATTGATTTTCGTGACTCTGAAACCAGAGACAGCCCGTCCTTCCAAGGCCAGGTCACCATCTCAGCCATCAAGTCCAGCAGCACCGCCCACCTGCAGTGGAGCAGCCTGAAGGCCTCGGACGCTGCCATGTATTACTGTG
IGH_Super_scaffold_mat_12	-	136503902	136503872	CACAGTG	CAGAAACCC	IGHV1-69*02	+	86.6438	34	136503909	CAGGAGCAGCTGGTGCAGTCTGGGGCTGAGGCGAAGAAGAAGCCTGGGCCTCAGTGAAGGTCTCCTGCAAGGCTTGGATACAGCTTCACCAGCTATGCTAGCAGCTGGGTGCGACAGGCCTGGACAAGGGCTCGAGTGGATGGAGTGATTATCCCTTTAGTTGGTGTCACGAACTATGCACAGAAGTTCCAGGGCAGAGTCACCATGACCGCAGACACATCACAAGCACAGCGTACATGGAGCTGAGCAGCCTGAGACCTGAGGACACAGCCGTGTATTACTGGG
IGH_Super_scaffold_mat_12	-	136437426	136437396	CACAGTG	CAGAAACCC	IGHV1-2*01	+	91.6955	50	136437433	CAGGTGCAGCTGGTGCAGTCTGGGGCGGAGGTGAAGAAGCCTGGGGCCTCCGTGAAGGTCTCCTGCAAGGCTTCTGGATACACCTTCACCAGCTATGGTATGCAGTGGGTGCGACAGGCCCCTGAACAAGGGCTCGAGTGGATGGGATGGATCAACACCAACACTGGTGGCACAAGCTACGCACAGAAGTTCCAGGGCAGAGTCACCATGACCAGGGACGCATCCACGAGCACAGCCTACATGGAGCTGAGCAGCCTGAGACCTGAGGACACGGCCGTGTATTACTGTG
IGH_Super_scaffold_mat_12	-	136632853	136632824	CACAGTG	GACACAAAC	IGHV3-69-1*01	+	91.2892	48	136632860	GAGGTGCAGCTGGTGGAGTCTGGGGGAGGCTTGGTTCAGCCCGGGGGGTCCCTGAGACTCTCCTGTGCAGCTTCTGGATTCACGTTCAGTGACTATGGCATGAACTGGTTTCGACAGGCTCCGGGGAAGGGGCTGGAGTGGGTCTCATACATTAGATATGATGGTGGTAGCACAAACTACGCAGACTCCGTGAAGGGCCGATTCACCATCTCCAGAGACAACGCCAAGAACTCGCTGTATCTGCAGATGAACAGCCTGAGAGCCGAGGACACGGCCGTGTATTACTG
IGH_Super_scaffold_mat_12	-	136337522	136337493	CACAGTG	GACACAAAC	IGHV3-7*01	+	91.6955	48	136337529	GAGGTGCAGCTGGTGGAGTCTGGGGGAGGCTTGGTTCAGCCCGGGGGGTCCCTGAGACTCTCCTGTGAGGCCTCTGGATTCACCTTCAGTAGCTACTGGATGTACTGGATCCGCCAGGCTCCGAGTAAGGGGCTGGAGTGGGTGGCCAACATAAAGTATGATGGAGGTGAAAAATACTACGCAGACTCCGTGAAGGGCCGATTCACCATCTCCAGAGACAACGCCAAGAACTCGCTGTATCTGCAGATGAACAGCCTGAAAACCGAGGACACGGCCGTGTATTACTGTG
IGH_Super_scaffold_mat_12	-	136828834	136828805	CACAGTG	AACACAAAC	IGHV3-7*01	+	89.8601	38	136828841	AGGTGCAGCTGGTGGAGTCTGGGGGAGGCTTGGCTCAGCCTGGGGGGTCCCTGAGACTCTCCTGTGCAGCTTCTGGATTCACGTTCAGTGACTACAGGATGTACTGGGTCCACCAGGCTCTGAGTAAGTGGCTGGAGTGGGTGGCCAACATAAAGTATGATGGAGGTGAAAAATACTACGCAGACTCCGTGAACGGCCGATTCACCATCTCCAGAGACAACGCCAAGAACTCGCTGTATCTGCAGATGAACAGCCTGAGAGCCGAGGACACGGCCATGTATTACTG
IGH_Super_scaffold_mat_12	-	136894137	136894108	CACAGTG	GACACAAAC	IGHV3-21*01	+	93.1034	55	136894144	GAGGTGCAGCTGGTGGAGTCTGGGGGAGGCTTGGTTCAGCCCGGGGGGTCCCTGAGACTCTCCTGTGCAGCCTCTGGATTCACCTTCAGCGGCTATGGCATGCACTGGGTCCGCCAGGCTCCAGGGAAGGGGCTGGAGTGGGTCTCATACATTAGTAGTCCTAGTGGTAGTAGCACATACTACGCAGACTCCGTGAAGGGCCGATTCACCATCTCCAGAGACAACGCCAAGAACTCGCTGTATCTGCAGATGAACAGCCTGAGAGCCGAGGACACGGCCGTGTATTACTG
IGH_Super_scaffold_mat_12	-	136861152	136861123	CACAGTG	AACACAAAC	IGHV3-23*01	+	92.0415	48	136861159	GAGGTGCAGCTGGTGGAGTCTGGGGGAGGTTTGGTTCAGCCTGGGGGGTCTTTGAGACTCTCCTGTGCAGCCTCTGGATTCACCTTCAGTAGTTATGCCATGGGCTGGGTCCGTCAGGCTCCGGGGAAGGGGCTGGAGTGGGTCTCAACTATTGGTACTGCTGGTAGCACGTACTACGCAGACTCCGTGAAGGGCCGATTCACCATCTCCAGAGACAACGCCAAGAACTCGCTGTATCTGCAGATGAACAGCCTGAGAGCCGAGGACACGGCCGTGTATTACTGTG
IGH_Super_scaffold_mat_12	-	136728569	136728540	CACAGTG	GTCAGAAAC	IGHV7-4-1*01	+	91.3495	53	136728576	CAGGTGCAGCTGGTGCAGTCTGGGCCAGAGCTGAAGCAGCCTGGGGCATCGGTGAAGGTCTCCTGCAAGGCTTCCGGATACACCTTCACAAGCTATGCTATCCACTGGGTGCGACAGGCCCCTGGACAAGGGCTTGACTGGATGGGATGGATCAACACTGACACCGGGAAGCCAACATATGCCCAGGGCTTCACAGGACGGTTTGTCTTCTCCATGGACACCTCGGTCAGCACAGCATATCTGCAGATCAGCAGCCTGAAGGCTGAGGACACGGCCGTGTATTACTGTG
IGH_Super_scaffold_mat_12	-	136466286	136466256	CACAGTG	CAGAAACCC	IGHV1-46*01	+	91.3495	52	136466293	CAGGTGCAGCTGGTGCAGTCGGGGGCTGAGGTGAAGCAGCCTGGGGCCTCAGTGAAGGTCTCCTGCAAGGCTTCTGGATACACCTTCACAAGCTACTGTATGCACTGGGTGCGCCAGGCCCATGCACAAGGGCTTGAATGGATGGGATACGTGTGCCCTGGTGATGGCAGCACAAACTACGCACAGAAGTTCCAGGGCAGAGTCACCATGACCAGGGACACGTCCACAAGCACAGCCTACATGGAGCTGAGAAGCCTGAGACCTGAGGACACGGCCGTGTATTACTGTG
IGH_Super_scaffold_mat_12	-	136596544	136596514	CACAGTG	CAGAAACCC	IGHV1-46*01	+	93.0796	62	136596551	CAGGTGCAGCTGGTGCAGTCTGGGGCTGAGGTGAAGAAGCCTGGGGCCTCCGTGAAGGTCTCCTGCAAGGCTTCTGGATACACCTTCACCAGCTACTATATGCACTGGGTGCGACAGGCCCCTGGACAAGGGCTCGAGTGGATGGGAGTATGATCCTGAAGATGGTAGTACAAGCTACGCACAGAAGTTCCAGGGCAGAGTCACCATGACCGCAGACACATCCACGAGCACAGCCTACATGGAGCTGAGCAGCCTGAGACCTGAGGACACGGCCGTGTATTACTGTG
IGH_Super_scaffold_mat_12	-	136563558	136563529	CACAGTG	GACACAAAC	IGHV3-21*01	+	93.0796	59	136563565	GAGGTGCAGCTGGTGGAGTCTGGGGGAGGCTTGGTTCAGCCTGGGGGGTCCCTGAGACTCTCCTGTGCAGCCTCTGGATTCACCTTCAGCAGCTATAGCATGAATTGGGTCCGCCAGGCTCCAGGGAAGGGGCTGGAGTGGGTCTCATACATTAGATATGATGGTGGTAGCACATACTACGCAGACTCCGTGAAGGGCCGATTCACCATCTCCAGAGACAACGCCAAGAACTCGCTGTATCTGCAGATGAACAGCCTGAGAGCCGAGGACACGGCCGTGTATTACTGTG
IGH_Super_scaffold_mat_12	-	136660873	136660843	CACAGTG	CAGAAACCC	IGHV1-2*01	+	91.3495	50	136660880	CAGGTGCAGCTGGTGCAGTCTGGGGCTGAGGTGAAGAAGCCTGGGGCCTCCGTGAAGGTCTCCTGCAAGGCTTCTGGATACACCTTCACCGACTACTACATGAGCTGGGTGCGACAGGCCCCTGGACAAGGGCTCGAGTGGATGGGAGGGATTATCCCTATAGTTGGTGTCACAAACTATGCACAGAAGTTCCAGGACAGAGTCACCATGACCGCGGACACGTCCACGAGCACAGCCTACATGGAGCTGAGCAGCCTGAGACCTGAGGACACGGCCGTGTATTACTGTG
IGH_Super_scaffold_mat_12	-	136397863	136397834	CACAGTG	GACACAAAC	IGHV3-23*01	+	91.3495	43	136397870	GAGGTGCAGCTGGTGGAGTCTGGGGGAGGCTTGGTTCAGCCCGGGGGGTCCCTGAGACTCTCCTGTGCGGCCTCTGGATTCACCTTCAGCAGCTATGCCATGCACTGGGTCCGCCAGGCTCCGGGGAAGGGGCTGGAGTGGGTCTCAGTTATCAGTACTGATGGTAGAACCACATACTACGCAGACTCCGTGAAGGGCCTATTCACCATCTCCAGAGACAACGCCAAGAACTCGCTGTATCTGCAGATGAACAGCCTGAAAACCGAGGACACGGCCGTGTATTACTGTG
IGH_Super_scaffold_mat_12	-	136724998	136724969	CACAGTG	GACACAAAC	IGHV4-28*01	+	94.4251	67	136725005	CAGGTGCAGCTGCAGGAGTCGGGCCCAGGACTGGTGAAGCCTTCGGAGACCCTGTCCCTCACCTGTGCTGTCTCTGGTTACTCCATCAGCAGTGGTTACTGGTGGAGCTGGATCCGCCAGCCTCCAGGGAAGGGTCTGGAGTGGATTGGGTACATCTATCATAGTGGGAGCACCTACTACAACCCGTCCCTCAAGAGTCGAGCCACCATATCAGCAGACACGTCCAAGAACCAGTTCTCCCTGAGGCTGAGCTCTGTGACCGCTGCGGACACGGCCGTGTATTACTG
IGH_Super_scaffold_mat_12	-	136756936	136756907	CACAGTG	GACACAAAC	IGHV3-21*01	+	94.1176	56	136756943	GAGGTGCAGCTGGTGGAGTCTGGGGGAGGCTTGGTTCAGCCTGGGGGGTCCCTGAGACTCTCCTGTGCAGCCTCTGGATTCACCTTCAGCAGCTATAGCATGAACTGGGTCCGCCAGGCTCCGGGGAAGGGGCTGGAGTGGGTCTCATACATTAGTAGTGGTGGTGGTACCATATACTACGCAGACTCCGTGAAGGGCCGATTCACCATCTCCAGAGACAACGCCAAGAACTCGCTGTATCTGCAGATGAACAGCCTGAGAGCTGAGGACACGGCCGTGTATTACTGCG
IGH_Super_scaffold_mat_12	-	136855039	136855010	CACAGTG	GACACAAAC	IGHV3-21*01	+	89.6552	57	136855046	GAGGTGCAGCTGGTGGAGTCTGGGGGAGGCTTGGTTCAGCCTGGGGGATCCCTGAGACTCTCCTGTGCAGCCTCTGGATTCACCTTCAGTAACTACTGGATGAGCTGGGTCCGCCAGGCTCCAGGAAAGGGGTTGGAGTGGATCTCAGGTATTAGTACTGGTGGTGACACATACTACCCAGATTCCGTGAAGGGCCGATTCACCATCTCCAGAGACAACGCCAAGAACTCACTGTTTCTGCAGATGAACAGCTTGAGAGCCGAGGACACGGCCATGTATTACTGTGCA
IGH_Super_scaffold_mat_12	-	136887597	136887567	CACAGTG	CAAAAACAC	IGHV1-46*01	+	90.9722	39	136887604	CAGGTGCAGCTGGTGCAGTCTAGGGCTGAGGTGAAGAAGCCTGGGGCCTCCGTGAAGGTCTCCTGCAAAGCTTCTGGATACACCTTCACAAGCTACACTATGCACTGGGTGCGACAGACCCCTGTACAAGGGCTCGAGTGGATGGGATGGATCTACCCTGATAATGGTAACACAAACTACGCACAGAAGTTCCAGGGCAGAGTCACCATGACCGCGGACAAGTCCACGAGCACAGCCTACATGGAGCTGAGCAGCCTGAGACCTGAGGACACGGCCGTGTATTACTGTT
IGH_Super_scaffold_mat_12	-	136590535	136590506	CACAGTG	GACACAAAC	IGHV3-69-1*01	+	91.2892	48	136590542	GAGGTGCAGCTGGTGGAGTCTGGGGGAGGCTTGGTTCAGCCCGGGGGGTCCCTGAGACTCTCCTGTGCAGCTTCTGGATTCACGTTCAGTGACTATGGCATGAACTGGTTTCGACAGGCTCCGGGGAAGGGGCTGGAGTGGGTCTCATACATTAGATATGATGGTGGTAGCACAAACTACGCAGACTCCGTGAAGGGCCGATTCACCATCTCCAGAGACAACGCCAAGAACTCGCTGTATCTGCAGATGAACAGCCTGAGAGCCGAGGACACGGCCGTGTATTACTG
IGH_Super_scaffold_mat_12	-	136557549	136557520	CACAGTG	GTCAGAAAC	IGHV7-4-1*01	+	91.3495	54	136557556	CAGGTGCAGCTGGTGCAGTCTGGGCCAGAGCTGAAGCAGCCTGGGGCATCGGTGAAGGTCTCCTGCAAGGCTTCTGGATACACCTTCACCAGCTATGCTATCCACTGGGTGCGACAGGCCCCTGGACAAGGGCTTGAGTGGATGGGATGGATCAACACCGACACCGGGAAGCCAACATATGCCCAGGGCTTCACAGGACGGTTTGTCTTCTCCATGGACACCTCGGTCAGCACAGCATATATTCAGGTCAGCAGCCTGAAGGCTGAGGACACGGCCGTGTATTACTGTG
IGH_Super_scaffold_mat_12	-	136459133	136459103	CACAGTG	CAGAAACCC	IGHV1-46*01	+	91.3495	50	136459140	CAGGTGCAGCTGGTGCAGTCTGGGGCTGAGGTGAAGAAGCCTGGGGCCTCTGTGAAGGTCTCCTGCAAGGCTTCTGGATACACCTTCACAAGCTACTACATGGACTGGGTGCGACAGGCCCCTGGACAAGGGCTCGAGTGGATGGGAGATATCGATCCTGAAGATGGTGAAACAAGCTACGCACAGAAGTTCCAGGGCAGAGTCACCATGACCGCAGACACATCCACGAGCACAGCCTACATGGAGCTGAGCAGCCTGAGACCTGAGGACACGGCCGTGTATTACTGTG
IGH_Super_scaffold_mat_12	-	136621694	136621664	CACAGTG	CACAAACCT	IGHV3-7*01	+	90.2098	48	136621701	GAGGTGCAGCTGGTGAGTCTGGGGGAGGCTTGGTTCAGCCTGGGGGTCCCTGAGACTCTCCTGTGCAGCTCTGGATTCACGTTCAGTGACTACAGGATGTACTGGGTCCGCCAGGCTCCGAGTAAGGGGCTGGAGTGGTGGCCAACATAAAGTATGATGGAGGTGAAATACTAAGCAGACTCCGTGAAGGGCCGATTCACCATCTCCAGAGACAACGCCAAGAACTCGCTGTATCTGCAGATGAACAGCCTGAGAGCCGAGGACACGGCCGTTTATTACT
IGH_Super_scaffold_mat_12	-	136359483	136359453	CACAGTG	CAGAAACCC	IGHV1-69*02	+	90.6574	50	136359490	CAGGTGCAGCTGGTGCAGTCTGGGGCTGAGGTGAAGAAGCCTGGGGCCTCCGTGAAGGTCTCCTGCAAGGCTTCTGGATACACCTTCACCAGCTATGCTATCAGCTGGGTGCGACAGCCCCCTGGACAAGGGCTCGAGTGGATGGGAGGTATTGATCCTGAATATGGTAGTACAAGCTACGCACAGAAGTTCCAGGGCAGAGTCACCATGACCGCAGACACGTCCACAAGCACAGCCTACATGGAGCTGAGCAGCCTGAGACCTGAGGACACGGCCGTGTATTACTGTG
IGH_Super_scaffold_mat_12	-	136391177	136391148	CACAGTG	GACACAAAC	IGHV3-72*01	+	92.1769	36	136391184	GAGGTGCAGCTGGTGGAGTCTGGGGGAGGCTTGGTTCAGCCCGGGGGGTCCCTGAGACTCTCCTGTGCGGCCTCTGGATTCACCTTCAGTGACTACAGGATGCACTGGGTCCGCCAGGCTCCGGGGAAGGGGCTGGAGTGGGTTGGCCGTATCAGAAGCAAATCTAACAGCTACGCGACGGAATACGCCGCGTCTGTGAAAGGCCGATTCACCATCTCAAGAGATGATTCAAAGGACTCGCTGTATCTGCAAATGAGCGGCCTGAAAACCGAGGACACGGCCGTGTATTACTGTA
IGH_Super_scaffold_mat_12	-	136489459	136489430	CACAGTG	GACACAAAC	IGHV3-69-1*01	+	92.0415	48	136489466	GAGGTGCAGCTGGTGGAGTCTGGGGGAGGTTTGGTTCAGCCCGGGGGGTCCCTGAGACTCTCCTGTGCGGCCTCTGGATTCACCTTCAGTAACTACTACATGAGCTGGGTCCGCCAGGCTCCAGGCAAGGGACTGGAGTGGGTCTCATACATTAGTTATGATGGTGGTAGCACAAACTACGCAGACTCCGTGAAGGGCCGATTCACCATCTCCAGAGACAACGCCAAGAACTCGCTGTATCTACAGATGAACAGCCTGAGAGCCGAGGACACGGCCGTGTATTACTGTG
IGH_Super_scaffold_mat_12	-	136784241	136784212	CACAGTG	GACACAAAC	IGHV3-23*01	+	92.7336	48	136784248	GAGGTGCAGCTGGTGGAGTCTGGGGGAGGCTTGGTTCAGCCTGGGGGGTCTTTGAGACTCTCCTGTGCAGCCTCTGGATTCACCTTCAGTAGCTATGCCATGGGCTGGGTCCGTCAGGCTCCAGGAAAGGGGCTGGAGTGGGTCTCAACTATTAGTACTGGTGGTAGCACGTACTACGCAGACTCCGTGAAGGGCCGATTCACCATCTCCAGAGACAACGCCAAGAACTCGCTGTATCTGCAGATGAACAGCCTGAGAGCTGAGGACACGGCCGTGTATTACTGTG
IGH_Super_scaffold_mat_12	-	136718398	136718369	CACAGTG	GACACAAAC	IGHV3-30*02	+	94.7552	79	136718405	AGGTGCAGCTGGTGGAGTCTGGAGGAGCCTTGGTCCAGCCTGTGGGGTCCCTGAGACTCTCCTGTGCAGCCTCTGGATTCACCTTCAGTAGCTATGGCATGCACTGGGTCCGCCAGGCTCCAGGGAAGGGGCTGGAGTGGGTGGCAGTTATATGGTATGATGGAAGTCAGAAATACTACGCAGACTCCGTGAAGGGCCGATTCGCCATCTCCAGAGACAATTCCAAGAACATGCTCTATCTTCAAATGAACAGCCTGAGAGCCGAGGACACGGCCGTGTATTACTG
IGH_Super_scaffold_mat_12	-	136750806	136750777	CACAGTG	GACACAAAC	IGHV3-21*01	+	92.1233	56	136750813	GAGGTGCAGCTGGTGGAGTCTGGGGGAGGCTTGGTTCAGACCGGGGGGTCCCTGAGACTCTCCTGTGCAGCCTCTGGATTCACCTTCTGTAGCAATGGCATAGACTGGGTCCGCCAGGCTCCAGGGAAGGGGCTGGAGTGGGTCTCATACATTAGTAGTCCTAGTGGTAGTAGCACATACTACGCAGACTCCGTGAAGGGCCGATTCACCATCTCCAGAGACAATGCCAAGAACTCGCTGTATCTGCAGATGAACAGCCTGAGAGCCGAGGACACGGCCGTGTATTACTGTG
IGH_Super_scaffold_mat_12	-	136554194	136554165	CACAGTG	GACACAAAC	IGHV4-4*01	+	93.7282	78	136554201	CAGGTGCAGCTGCAGGAGTCGGGCCCAGGACTGGTGAAGCCTTCGGAGACCCTGTCCCTCATCTGCGCTGTCTCTGGTTACTCCATAAGCAGTGGTTACTGGTGGAGCTGGATCCGCCAGCCTCCAGGGAAGGGGCTGGAGTGGATTGGGAGAATCTATCGTAGTGGGAGCACCTACTACAACCCGTCCCTCAAGAGTCGAGCCACCATATCAGCAGACACGTCCAAGAACCAGTTCTCCCTGAGGCTGAGCTCTGTGACCGCCGCGGACACGGCCGTGTATTACTG
IGH_Super_scaffold_mat_12	-	136651231	136651201	CACAGTG	CAGAAACCC	IGHV1-46*01	+	92.3875	48	136651238	CAGGTGCAGCTGGTGCAGTCTTCACCCCAGGTGAAGAAGCCTGGGGCCTCCGTGAAGGTCTCCTGCAAGGCTTCTGGATACACCTTCACCAACTACTACATGCACTGGGTGCGACAGGCCCCTGGACAAGGGCTTGAGTGGATGGGACGGATCTACCCTAGTAGTAGTAGCACAAACTATGCACAGAAGTTCCAGGGCAGAGTCACCATGACCAGGGACACGTCCACAAGCACAGCCTACATGGAGCTGAGCAGCCTGAGACCTGAGGACACGGCCGTGTATTACTGTG
IGH_Super_scaffold_mat_12	-	136814227	136814198	CACAGTG	GACACAAAC	IGHV3-23*01	+	92.1233	60	136814234	GAGGTGAAGCTGGTGGAGTCTGGGGGAGGCTTGGTTCAGCCCGGGGGGTCCCTGAGACTCTCCTGTGCAGCCTCTGGATTCACCTTCAGTAGCTACTGGATGAGCTGGGTCCGCCAGGCTCCAGGGAAGGGTCTGGAGTGGGTCTCACTCATTAGTAGTGGCAGTGGTGGTAGCACATACTACGCAGACTCCGTGAAGGGCCGATTCACCATCTCCAGAGACAACGCCAAGAACTCGCTGTATCTGCAGATGAACAGCCTGAGAGCTGAGGACACGGCCGTGTATTACTGTG
IGH_Super_scaffold_mat_12	-	136582140	136582110	CACAGTG	CTAAAACCC	IGHV5-51*01	+	94.1176	50	136582147	GAGGTGCAGCTGGTGCAGTCTGGAGCAGAGGTGAAAAGGCCCGGGGAGTCGCTGAAGATCTCCTGTAGGGCTTCTGGATACAGCTTTAACAGCTACTGGATCAGCTGGGTGCGACAGATGCCCGGAAAAGGCCTGGAGTGTATGGGGAGGATCTATCCTGGTGACTCTGATACCAGATACAGCCCGTCCTTCCAAGGCCACGTCACCATCTCAGCCGACAAGTCCAGCAACACCGCCCACCTGCAGTGGAGCAGCCTGAAGGCCTCGGACGCTGCCATGTATTACTGTG
IGH_Super_scaffold_mat_12	-	136646513	136646483	CACAGTG	CAGAAACCC	IGHV1-46*01	+	91.6955	52	136646520	CAGGTGCAGCTGGTGCAGTCGGGGGCTGAGGTGAAGCAGCCTGGGGCCTCAGTGAAGGTCTCCTGCAAGGCTTCTGGATACACCTTCACTAGCTACTGTATGAACTGGGTGCGACAGGCCCATGCACAAGGGCTTGAATGGATGGGATACATGTGCCCTGGTGATGGCAGCACAAACTACGCACAGAAGTTCCAGGGCAGAGTCACCATGACCAGGGACACATCCACAAGCACAGCCTACATGGAGCTGAGCAGCCTGAGACCTGAGGACACGGCCGTGTATTACTGTG
IGH_Super_scaffold_mat_12	-	136744789	136744759	CACAGTG	CAAAAACCC	IGHV1-46*01	+	91.6955	39	136744796	CAGGTGCAGCTGCTGCAGTCGGGGGCTGAGGTGAAGAAGCCTGGGGCCTCCGTGAAGGTCTCCTGCAAGGCTTCTGGATACAGCTTCACCAGCTATGCTATCAGCTGGGTGCAACAGGCCCCTGGACAAGGGCTTGAGTGGATGGGACGGATCTACCCTAGTAGTGGTAACACAAACTACGCACAGAAGTTTCAGAGCAGAGTCACCATGACCAGGGACACGTCCACGAGCACAGCCTACATGGAGCTGAGCAGCCTGAGACCTGAGGACACGGCCGTGTATTACTGTG
IGH_Super_scaffold_mat_12	-	136350603	136350574	CACAGTG	GACACAAAC	IGHV3-23*01	+	92.7336	56	136350610	GAGGTGCAGCTGGTGGAGTCTGGGGGAGGCTTGGTTCAGCCCGGGGGGTCCCTGAGACTCTCCTGTGCAGCCTCTGGATTCACCTTCAGTAGCTATGCCATGGACTGGGTCCGCCAGGCTCCGGGGAAGGGGCTGGAGTGGGTCTCATACATTAATTATAATGGCGGTAGCACATACTACGCAGACTCCGTGAAGGGCCGATTCACCATCTCCAGAGACAACGCCAAGAACTCGCTGTATCTGCAGATGAACAGCCTGAGAGCCGAGGACACGGCCGTGTATTACTGTG

## Sheet: Eurasian_red squirrel_mSciVul1
contig	reference strand	heptamer index	nonamer index	heptamer	nonamer	best aligned human gene	alignment direction	alignment PI	longest common k-mer	start of gene	gene sequence
IGH_HiC_scaffold_2_arrow_ctg1	+	262355	262385	CACAGTG	CACAAACCT	IGHV3-69-1*01	+	82.5503	26	262057	GAGGTGCAGCTGGTGCAGCCTGGAGGAGGCCTGGTGCAGCCTGGGGGGTCCCTGCAACTCTCCTGTGCAGCCTCTGGATTCATCCTTCAGGGACTAGTGATTGAGCTGGTTCCTGCCACCCTCCAAGGAAGGGGCTAGAGTGGATCTCAGACATTAGCAGTAATAGTGCTACCATTAACAATGCGGACTCCATGAAGGGCCAATTTGCCATCTCCAGAGACAACTCCAAGAACACGCTGTACCTGCAAATGAGCAGCCTGAGAGCTGAGGATACGGCCACCTATTACTTTGCCAGAGA
IGH_HiC_scaffold_2_arrow_ctg1	+	656154	656184	CACAGTG	CACAAACCT	IGHV4-30-4*02	+	68.3007	20	655850	CCGTCTCTCCTCTCTGCTGTGAGACAACAGGGCTAGCTGTGAAAGACTGCAGAGACCCTGGCCCTCACCTGTGCTGTGTTTAAATTCTCTGTCACCAAGAGTAGTTATGGCTGCAGGTGGATCCATCAACCCACAGGGAAGGGGGTGGAGTGGATTGAGCTCATATGCACTGATGATAGCAATAATACAGGACATCCCTCAAGGGCTGAGCGTCTATCTCCAGAGAAACATCCTATAGCCAGTTCTCCCTGCAGCTGAGCTCCCTGACCACCCAGGACACAGCCACCTATTACTGTGCCAGAGA
IGH_HiC_scaffold_2_arrow_ctg1	+	525613	525643	CACAGTG	CACAAACCT	IGHV3-69-1*01	+	83.7838	32	525318	GACGTGCAGCTGGTGGAGTCTGGGGGAGGCCTGGTGCAGGCTGGGGGATCCCTGAGACTCCCCTGTGCAGCCTCTGGTTTCACCTTCAGTGCCTACTGGGTGAGCTGGGTCTGCCAGGCTCCAGGGAAGAGACTGGAGTAGGTCTCTACATTAAGTATGATCGTAATCGTAAAAACTATGCCAACTCCGTGAAGAGCCAATTCACCATCTCCAGAGACAACTCCAAGAACACCCTGTACCTATAAATGAGCAGCCTGAGAGCCGAGGACACGGCCACCTATTACTGTGCTGGAGA
IGH_HiC_scaffold_2_arrow_ctg1	+	787834	787864	CACAGTG	CACAAACCT	IGHV3-21*01	+	80.9524	35	787541	GAGGTGCAGCTGGTGGAGTCTGGGGGAGGCCTGGTTCAACCTGGGGGGTCCCTGTGACCCTCCTGTGCAGCCTCTGGATCCACCTTCAGTAGATACTGGACGAGCTGACTCCACCAGGAACCAGGGAAGGTGCTGGAGTGGGTCTCCAACATTAGTGGTAGTTGTTGTAAAATTAACTGTGTTGACTCAGTGAAAGGCTGATTCACCATCTCCAAGAAGAAAGTCAAGGACAGGCTGCACCTGCAAATGAGAGTCTGAGAACCAAGGACACGGCCACCTATTACTGTGCCAGA
IGH_HiC_scaffold_2_arrow_ctg1	+	1313256	1313285	CACAGTG	GACACAAAC	IGHV4-30-4*02	+	71.9033	35	1312930	CAGGTACACTGCAGGAGTCGGGACCTGGCCTGGTGAAGCCCTCACATACACCTGTGAATTTCCTCACCTGTGTTCTCACCTGTCCCTCACTTGTGCTGTGTCTGGATTCTCCATCACAACCAGTGGTTCCTGCTGGAGCTGGATCCTTCAGCCCCCAGGAAGGGGCTGACGTGGATAGTGTGCATATGTAGTGATCATAACACTTACTACAGCCCATCCCTCAAGAGCTGAGCGTCCATCTGCAGAGACACATCCAAGAACCAGTTCTCCCTGCAGCTGAGCTCCCTGACCACCCAGGATACAGCCACCTATTACTGTGCCAGAGA
IGH_HiC_scaffold_2_arrow_ctg1	+	1445151	1445181	CACAGTG	CACAAACCT	IGHV4-28*01	+	80.2676	28	1444852	CAGGTGCAGCTGCAGGAGTCAGGACCTGGCCTGGTGAAGCCCTCAGAGACCCTGTCCCTCACCTGTGCTGTGTCTGGATTCTCCATTACAACCAGTGGTTACTGCTGGCACTGAATCCGTGAGCCCCCAGGGAAGGGGCTGGAGTGGATAGGGTGCATATGTAGTGGTGGTAGCACTTACTACAGCCCATCCCTCAAGAGCCGAGCATCCATCTCCAGAGACACGTCCAAGAACCAGTTCTCCCTGCACTTGAGCCCCCTGACCACCCAGGACACGGCCATCTGTTACTGCGCCAGAGA
IGH_HiC_scaffold_2_arrow_ctg1	+	791665	791694	CACAGTG	GACACAAAC	IGHV4-30-2*01	+	76.2542	17	791374	CAGGTGCAGCTGCAGGGCTCTGGACCTGGCCTGGTGAAGCCCTCACAGACACTGTCCCTCACCTGTACTGTGTCTGGTTACTCCATTTCAAGTAGTGATTACTGCTGGAACTGGATCTGGAGGAAAGGGACTGGAGTGGATAGGGGGAATATATAATAGTGGTAACACTTACTACAGTCCATCACTCAAGAGCTGAGCATCCATCTCCAGAGACACGTCAAAGAACCAGTTTTCCATGCAGCTGAGCTCCCCGACCACCCAGGACACAGCCACCTATTACTGTGCCAGAGA
IGH_HiC_scaffold_2_arrow_ctg1	+	1578543	1578573	CACAGTG	CACCAAAAC	IGHV4-30-2*01	-	73.4007	19	1578204	GTATGTTCCTGGGACCACACTGACATCCCTCACTGTGAGTCCAGCACAGTAATACACAGCCACATCCTCATTGGTCACAGAATTCCACGTAGGGGAACTGATTCTCGTGTGTGTCTCTGGACATGGTGACTTGATTCTTCAGGGAGGGGTAGTACATTGTGCCTCCACTACCAAGGATGTGCCCCATTCACTGCAGCTTCTTTCCTGGAGGCTGATGGATCCAGCTCCAGCTGTAACCAATAGTGATGGAGTAATTAGAGACAGCAAGGTGAGGAACAGGTCTGCGAGGTCTCCACCACCCTGATCCTGAATACTGCAGCTGCACCTGAGCCAGAGGAC
IGH_HiC_scaffold_2_arrow_ctg1	+	661989	662018	CACAGTG	GACACAAAC	IGHV3-21*01	+	87.8378	47	661693	GATGTGCAGCTGGTGGAGTCTGGGGGAGGCCTGGTGCAGCCTGGGGGATCCCTGCGACTCTCCTGTGCAGCCTCTGGATTCACCTTCAGTAGCTACTGGATGTACTGGGTCCGCCAGGCTCCAGGGAAAGGGCTGGAGTGGATCTCACGCATTAGTGGTAATAGTGCTACCATTAACTATGCGGACTCAGTGAAGGGCCGGTTCACCATCTCCAGAGACAACTCCAAGAACACGCTGTACCTGCAAATGAGCAGCCTGAGAGCCGAGGACACAGCCACCTATTACTGTACTAGAGA
IGH_HiC_scaffold_2_arrow_ctg1	+	402898	402927	CACAGTG	TACACAAAC	IGHV4-28*01	+	81.2709	29	402599	CAGGTACAGCTGCAGGAGTTGGGACCTGGCCTAGTGAAGCCCTCACAGACCCTGTCCCTCACCTGTGCTGTGTCTGGATTCTCCATCATGAGTACTGGTTACTGCTGGAGCTGGATCCGTCAGCCCCCAGGGAAGGGGCTGGAGTGGATAGGGTACATAAGTTATGATGGGTGCACTTACTAAAGCCCATCCCTCAAGAGCCGAGCGTCCATCTCCAGAGACACGTCCAAGAACCAGTTCTCCCTGCAGCTGAGCTCCCTGACCACCCAGGACACAGACACCTATTACTGTTCCAGAGA
IGH_HiC_scaffold_2_arrow_ctg1	+	928258	928287	CACAGTG	GACACAAAC	IGHV4-28*01	+	72.1477	28	927960	AGATACAGCTGCTGGGGTCATGACCTGGCCTGGTGAAGCTGTTACAGATACTGTCCCTCATGTGTACTGTGTCTGAATTCTCCATCACAACCAGATATTACTGCTGGAACTGGATTTGTCAACACACAGGGAAGGGGCTGGAGTGGATGAGGCTCAAATTTTATGATGGTACCACTAACTACAGCGCTTCCATGAAGTTCTGAACTTCCATATCTAGAGACACGTCCAAGAACCAGTTCTCCCTGCAGCTGAGCTCCCTGACCACCCAGGACATGGCCACCTATTACTGTGCCAGAGA
IGH_HiC_scaffold_2_arrow_ctg1	+	1453715	1453745	CACAGTG	CACAAACCT	IGHV3-11*01	+	83.4459	48	1453424	ACGTGCAGCTGGTGGAATCTGGGGGAGGCCTGGTGCAGCCTCAGGGTCCCTGCGACTCTCCTGTGCAGCCTCTGGATTCACCTTCAGTGACTACTGGATGAGCTGGGTCCGCCAGGCTCCAGGGAAGGGGCTGGAGTGGGTCTTCAACATTAGTGGTAGTTGTTGTACCATTAACTGTGCTGATTCAGAAAGGCTGATTCACCATTTCGAGGGAGAAAGCCAAGGACAGGCTGTACCTGCAAATGAGAGTCTGAGAACCAAGGACACGGCCACCTATTACTGTGCCAGAGA
IGH_HiC_scaffold_2_arrow_ctg1	+	144495	144524	CACAGTG	GACACAAAC	IGHV3-69-1*01	+	86.4865	47	144199	GAGGTACAGCTGGTGGAGTCTGGGGGAGGCCTGGTGCAGCCTGGAGGGTCCCTGCGACTCTCCTGTGCAGCCTCTGGATTCACCTTCAGTGACTACTACATGCACTGGGTCCGCCAGTCTCCAGGGAAGGGGCTAGAGTGGATTGGCCAAATTAACCCAAATGGTGGTAGCACCTACTACCCAGACTCCGTGAAGGGCCGATTCACCATCTCCAGAGACAACTCCAAGAACACACTGTACCTGCAAATGAGCAGCCTGAGAGCCGAGGACACAGCCACCTATTACTGTGCCAGAGA
IGH_HiC_scaffold_2_arrow_ctg1	+	1457508	1457537	CACAGTG	GACACAAAC	IGHV4-30-2*01	+	83.2776	29	1457212	CAGGTGCAGCTGCAGGAGTCAGGACCTGGCCTGGTGAAGCCCTCGCAGTCCCTGTCCCTCACCTGTGCTGTGTCTGGTTACTCCATCTCTAGTGGTTACTGCTGGAGCTGGATCCGTCAGCCCCCAGGGAAGGGGCTGGAGTGGATAGGGTACATATGTAGTGGTGGTAGCACTTACTACAGCCCATCCCTCAAGAGCCGAGCATCCATCTCCAGAGACACGTCCAAGAACCAGTTCTCCCTGCAGCTGAGCTCCCTGACCACCCAGGACACGGCCACCTATTACTGTGCCAGAGA
IGH_HiC_scaffold_2_arrow_ctg1	+	1195404	1195433	CACAGTG	GACACAAAC	IGHV4-4*01	+	75.3289	35	1195100	CAGGTGCAGCTGCAGGAGTTAGAACCTGGCCTGGTGAAGCCCTCAGAGACACTGTCCTGTCCCTCACCTGTGCTGTGTCTGGATTCTCCATCTCCATCAGTGGTTATGCCTGGAGTTGGATCTGTCTACCCGCAGGGAAGGGGCTGGAGTGGATAGGGGAAATATGGAGTGATGGCAGCACTAACTACAGCCCATCCAAAAAGTGCTCGGCGTCCATCTCCAGAGACACATCCAAGAACCAGTTCTCCCTGCAGCTGAGCTCCCTGACCACCCAGGACATGGCCACTTATTTCTGTGCCACAGG
IGH_HiC_scaffold_2_arrow_ctg1	+	934916	934946	CACAGTG	CTCAAACCT	IGHV3-11*01	+	69.7068	33	934619	CTGTGTTTGCAGGTGTGCAGTGTGAGGTGCAGCTGGTGGAGTCTGGGGGAGGCCTGTGACAGTCCTGTTCAGCTGCTGGGTCAAGTGACTACTACATGGATGTGGTCTGCCAGGCTCCACGGAAGAGACTATTTGGGTTGCTCTTACAAAAAACAAAACTAGTACTTACAACACTAAGTATGCTGCATCAGGGAAAGGCCAATTCTCCAACTCCAATGACTATGCCAAGAACACACTCTACTTGCAAATGAGCAGTCCAAGAGCCCAGAACATGGCCACCTACTACTGGGCCAGAGA
IGH_HiC_scaffold_2_arrow_ctg1	+	1328605	1328634	CACAGTG	GACACAAAC	IGHV4-30-2*01	+	77.0764	20	1328309	CAGTTGCAGCTGCAGGAGTCAGGATCTCGCCTGGCAAAGCCTTTGCAGACCCTGTCCCTCACCTGTGCTGTGTCTGGATTCTCCATCACAACAGGGTAGTACTGCTGGCACTGGATCCGTCAGCCCCAGAGAAGGGGCTGGAGTGGATAGGGTTATATGTAGTAAGAGTAACACTTACTACAGTTCATCCTTCAAGAGCCGAGCGTCCATCTCCAGAGACACATCCAAGAACCAGTCTCCCTGCAGCTGAGCTTCCTGACCACCCAGGACCCGGCCACCTACTACTGTGCCAGAGA
IGH_HiC_scaffold_2_arrow_ctg1	+	805990	806019	CACAGTG	GACACAAAC	IGHV3-38*01	+	83.165	37	805694	GACGTGCAGCTGGTGGAGTCTGGGGGAGGCTTGGGGCAGCCTGGAGGGAGCCTGCGACTCTCCTGTGCAGCCTCTGGATTCACCTTCAGTGAGTACTACATGAGCTGAATCCGCCAGTCTCCAGTGAAGGGACTAGATTGAGTGGGCCAAATTAACACAAATGGTGGTAGCACCTACTACCCAGACTCTGTGAAGGGCGGATTCGCCATCTTCAGACACAACTCCAAGAACACGCTGTATCTGCAAATGAGCAGCCTGAGAGCTGAGGGCACAGCCACCTATTACTGTGTCAGAGA
IGH_HiC_scaffold_2_arrow_ctg1	+	1199238	1199267	CACAGTG	GACACAAAC	IGHV3-23*01	+	85.8108	47	1198942	GACGTGCAGCTGGTGGAGTCTGGGGGAGGCCTAGTGCAGACTGGGGCACCCCTGCGACTCTCCTGTGCAGCCTCTGGATTCACCTTCAGTAGCTACTGGATGAGCTGGGTCCACCAGGCTCCAGGGAAGGGGCTGCAGTGGGTTGCAGCAATTAACAAGGATGGTGGTAGCACCTAGTATCCAGACTCTGTGAAGGGCTGGTTAACCATCTCCAGAGACAACTCCAAGAACACGCTGTACCTGCAAATGAGCAGCCTGAGAGCCGAGGACACGGCCACCTATTACTGTGCCAGAGA
IGH_HiC_scaffold_2_arrow_ctg1	+	943121	943150	CACAGTG	GACACAAAC	IGHV4-30-2*01	+	73.1392	16	942812	CAGGCGCATCTGCAGGAGTCAGGACCTGGCATAGTGAAGCCCTCACAGACCTTGTCCCTCACATGTGCTGTGTCTGGTTACTCCATCACAACAAGGGGTTACTGCTGGAACTGGATCCATCAGCCCACAGAGAAAGGACTGGAGTGAATAGGGGAAATATGTTATGATGGTAGCACTTACTACAGCTCATCCTTCAAGAGCCAAGTGTCTATCTCCGGAGATGTATCCAAGAACCAGTTGTCTCTGCAGCTGAATTCCCTGACCACCCAGGACACATGGGTGGTCCCACACCTATTACTGTGGCAGAGA
IGH_HiC_scaffold_2_arrow_ctg1	+	159127	159156	CACAGTG	GACACAAAC	IGHV4-30-2*01	+	81.9398	29	158831	CAGGTGCAGCTGCAGGAGTCAGGACCTGGCCTGGTGAAGCCCTCGCAGACCCTGTCCCTCACTTGTGCTGTGGCTGGTTACTCCATCTCTAGTGGTTACTGCTGGCACTGGATCCGTCAGCCCCCAGGGAAGGGGCTGGAGTGGATAGGGTACATATGTAGTGGTGGTAGCACTAACTACAGCCCATCCCTCAAGAGCAGAGTGTCCATCTCCAGAGACACGTCCAAGAACCAGTTCTCCCTGCAGCTGAGCTCCCTGACCACCCAGGACACGGCCACCTATTACTGTGCCAGAGA
IGH_HiC_scaffold_2_arrow_ctg1	+	817404	817433	CACAGTG	TACACAAAC	IGHV4-30-2*01	+	80.2676	23	817105	CAGGTGCAGCTTCAGGAGTCAGGACCTGGCCTGGTGAAGCCCTCGCAGACCCTGTCCCTCACCTGTGCTGTGTCTGGATTCTCCATCACAACCAGTGGTTATGCCTGGCACTGGATCCGTCAACCCCCAGGGAAGGGGCTAGAGTGGATAGGGTACATAAATTATGGTGGTGGCACTAACTACAGCCCATCACTCAAGAGCCGATTGTCCATCTCCAGAGACACGTCCAAGAACCAGTTTTCCCTGCAGCTGAGCTCCCTGACCACCCAGGACACGGCCACCTATTACTGTGCCAGAGA
IGH_HiC_scaffold_2_arrow_ctg1	+	32558	32587	CACAGTG	GACACAAAC	IGHV3-30*01	+	80.678	25	32264	ATGTGGAGTTGGTGGAGTCTGGGGGAGGCCTGGTGCAGCGTGGGGGGTCCCTGTGACTCTCCTGTGCAGTCTCTGGATTCAACTTCAGTGACTACTGCATGCACTGTTTCTGCCAAGCTCTAGGGAAGGGGCTGGAGTGGGTCACATATATTGAGTATGATAGTAGTGATAAAAACTATCCAACTCCATGAAAAGCTGTATCACCATCTCCAAAGATGATGCCAAGAACACGTTGTACCTGCAAATGAGCAGTCTGAGAGTTGAGGACACAGTCACCTATTACTGTGCCATAGA
IGH_HiC_scaffold_2_arrow_ctg1	+	1212491	1212520	CACAGTG	GACACAAAC	IGHV3-53*01	+	87.8378	66	1212195	GAGGTGCAGCTGGTGGAGTCTGGAGGAGGCCTGGTGCAGCCTGGGGGGTCCCTGAGACTCTCCTGTGCAGCCTCTGGATTCACCTTCAGTAGCTACTGGATGAACTGGGTCCGCCAGGCTCCAGGGAAGGGGCTGGAGTGGGTTGGTAATATTAACTATGATGGTGGTAGCACCAACTACAAAAACTCTGTGAAGGGCCGATTCACCATCTCCAGAGACAACTCCAAGAACACGCTGTACCTGCAAATGAGCAGCCTGAGAGCCGTGGACACGGCCACCTATTACTGTGCTAGAGA
IGH_HiC_scaffold_2_arrow_ctg1	+	164221	164252	CACAGTG	CACAAACCT	IGHV3-72*01	+	84.3333	42	163921	GAGGTGCAGCTGATGGAGTCTTGGGGAGGCCTGGTGCAGCCTGGGGGATCCCTGCGACTCTCCTGTGCAGCCTCTGGATTCACCTTCAGTGACTACTGGATGAGCTGGGTCCACCAGGCTACAGGGAAGGGGCTGGAGTGGGTTGCTCTTACAAGAAACAAAGCTAATAGTTACACCACTGAATATGGAGCATCTGTAAAAGGCCGGTTCACCATCTCCAGAGACGACACAAAAAATATGCTCTACCTGCAAATGAGCAGCCTGAGAGCCAAGGACACGGCCATCTATTACTGTACTGCA
IGH_HiC_scaffold_2_arrow_ctg1	+	1343974	1344003	CACAGTG	GACACAAAC	IGHV3-30*01	+	89.3471	39	1343683	ACGTGCAGCTGGTGGAGTCTGGGGGAGGCCTGGTGCAGCCTGGGGAATCCCTGCGACTCTCCTGTGCAGCCTCTGGGTTCACCTTCAGTAGCTACGACATGAGCTGGGTCCGCCAGGCTCCAGGAAAGGGGCTGGAGTGGGTTGCAGGTATATGGTATGATGGAAGTCAGAAATACTATGCTGACTCTGTGAAGGGCCGATTCACCATCTCCAGAGACAACTCCAAGAACATGCTGTACCTGCAAATGAGCAGCCTGAGAGCTGAGGACACAGCCACCTATTACTGTGCCA
IGH_HiC_scaffold_2_arrow_ctg1	+	426552	426581	CACAGTG	GACACAAAC	IGHV3-7*01	+	87.1622	47	426256	GACGTGCAGCTGGTGGAGTCTGGGGGAGGCCTGGTGCAGCCTGGGGGATCCCTGCGACTCTCCTGTGCAGCCTCTGGATTCACCTTCAGTAGCTACTGGATGAGCTGGGTCCGCCAGGCTCCAGGGAAGGGACTGGAGTGGATTGGAGAAATTAACCAGGGTGGTGGTACGACAAACTATGCCAACTCTATGAAGGGCCGATTCACCATCTCCAGAGACAACTCCAAGAACACGCTGTACCTGCAAATGAGCAGCCTGAGAACCGAGGACACGGCCACCTATTACTGTGCTAGAGA
IGH_HiC_scaffold_2_arrow_ctg1	+	1214568	1214597	CACAGTG	GACACAAAC	IGHV3-7*01	+	80.0676	38	1214274	GAGGTGCAGCTGGTGGAGTCTGCGGGAGGCCTGGTGCAGCCTGGGGGGTCCCTGCGACTCTGTCGTGCAGCCTCTGGATTCACCTTCAGTAGCTACTGGATGAACTGGTTCTGCTTGGCTCTGCAGAATTCACTGGGGTTGTGGAGGATATTAACAAAGAAGGAAGTAAAACAAACTATGCTGACTCAATGAAGGGTGATTCAACATTTCCAGAGACAACTCGAAGAACAGAATCTACCTGCAAATGAGCAGCCTGAGAGCTGAGGACACGGCCACCTATTACTGTGCTGGAGA
IGH_HiC_scaffold_2_arrow_ctg1	+	298944	298973	CACAGTG	GACACAAAC	IGHV3-69-1*01	+	84.5118	43	298647	GAGGTGCAGCTGGTGGAGTCTGGGGGAGGCCTGGTGCAGCCTGGGATGGTCCCTCGGACTCTCCTGTGTAGCCTCTGGATTCACCTTCAGTGACTACTACATGAGCTGGGTCTGCCAGGCTTTAGGGAAGGGGCTGGAGTTGGTTGCAGCAATTAAAAAGGATGGTGGTAGTATCTACTACCCAGACCCTGTGAACAGCTGGTTCACCATCTCCAGAGACAACTCCAAGAACACGCTGTACCTGCAAATGAGCAGCCTGAGAGCCGAGGACATAGCCACCTATTACTGTGCCAGGGA
IGH_HiC_scaffold_2_arrow_ctg1	+	1085388	1085418	CACAGTG	CACAAACCT	IGHV4-28*01	+	73.5786	21	1085092	CAGGAGCAGCTGCAGTAGTCCAGACTTCGCCTGGCAAATCCTTTGCAGACCCTGTCCCTCACCTGTGCTGTGTCTGGATTTCCATCACAACAAGGTAATACTGCTGGCACTGGATCCACCATCCCCTAGGGAAGGGGCTGGAGTGGATAGGGCACATATGTTATGGTGGTAACAGTTACTACAGCTCATCCTTCAAGACCCGAGCATCCATCTCCAGAGGCATGTCCAAGAACCAGTTCTCCCCAGCTGAGCTCCCTGACCACCCAGGACACAGTAACCTATTATACTGCCAGAGA
IGH_HiC_scaffold_2_arrow_ctg1	+	825207	825237	CACAGTG	CAGAAATCT	IGHV4-30-2*01	+	74.0741	22	824915	CAGGTGCAGCTGCAGTATGCAGGACCAGGGTGGTAGAGACCTCACAGACCTGTTCCTCACCTGTGCTGTCTCTGGTTACTCCATCACTATTGGTTACACCTGGAACTGGATCCATCAGCCTGCAGGAAAGGGGCTGCAGTGAATGGGGCACATTCTTAGTAATGGGGCACAGCTTACTACCCCTCCCTGAATGGTCAAGTCACCATGTCTAGAGACACATACAAGAATCAGTTCCTCTGCAGTGGAGTTCTGTGACCAATGAGGATGTGACTGTGTATTACTGTGCTGGACT
IGH_HiC_scaffold_2_arrow_ctg1	+	956832	956861	CACAGTG	GACACAAAC	IGHV4-28*01	+	80.1347	32	956534	CAGGTACAGCTGCAGGAGTTGGGACCTGGCCTAGTGAAGCCTTCACAGACCCTGTCCCTCACCTGTGCTGTGTCTGGATTCTCCATCATGAGTACTGGTTACTGCTGGAGCTGGATCCTCAGCCCCCAGGGAAGGGGCTGGAGTGGAGAGGGTACATAAGTTATGATGGGTGCACTTACTAAAGCCCATCCCTCAAGAGCCGAGCGTCCATCTCCAGAGACACGTCCAAGAACCAGTTCTCCCTGTGGTTGAGCTCCCTGACCACCCAGCACAAGGTCACCTATTACTGTACCAGAGG
IGH_HiC_scaffold_2_arrow_ctg1	+	433416	433445	CACAGTG	GACACAAAC	IGHV3-11*01	+	81.4189	51	433122	AGGTGCAGCTTGTGGAGTCTGGAGGAGGCCTGGTGCACCCTAGGGGTCCCTGTGACTCTCCTGTGCAGCCTCTGGATTCACCTTCAGTGACTACTACATGAGCTAGGTCCGCCAGGTTCTAGGGAATTGGCTGGAGTTGGTTGGTGATATTAACAAGTATGATGGTAAAACAAACTATGCCAAATTTATGAAGTGCTGATTCATCATCTCCAGAGACAACTTCAAGAACACACTGTACCTGAAAAAGATCAGTCTGAAAACCGAGGACACAGCCACCTATTACTGTGCCAGAGA
IGH_HiC_scaffold_2_arrow_ctg1	+	173420	173449	CACAGTG	GACACAAAC	IGHV4-30-2*01	+	71.2375	17	173128	CAGGTGCAGCTGCATGAGTCAGGTTCTGGTCTGATGAAGCCCTCACAGCCTCTGTCTCTCTCATGTGCTGTTGCTGGATTCTCCATCAACACCATGGTTATGGCTGGATGTGAATCTGTCATCCTGCAAGAAAGGGCAGGAGTGGTTTGAAAAAAAATATGAAGTGACGCTACAGTAATTACAGCCTCAAGAGCTGAGAGTCCATCTCCACAGACACGTCCAAGACCCAGTTCTTCCTGCAGCTAAGCCCCCTGACCACCCAGGACACGGTCACCTATTACTGTGCCAGAGA
IGH_HiC_scaffold_2_arrow_ctg1	+	1354710	1354740	CACAGTG	CACAAACCA	IGHV4-38-2*01	+	79.1946	35	1354414	CAGGTGCAGCTTCAGGAGTCAGGAGCTGGCCTGGTGAAGCCCTCACAGTCCCTAACCCTCATCTGTGCTGTGTCTGGTTACTCCATCTCTAGTAGTTACTGCTGGAGCTGGATCCGTAAGCCCCCAGGGAAGGGGCTGGAGTGGATAGTGTGCATATGTAGTAATGGTAACAATTACTACAGCCCATCCCTCAAGAGCAGAGTGTCCATCTCCAGAGACACATCCAAGAACCAGTTCTCCCTGCAGCTGAGCTCCTGGACCACCCAGAACACGGCTACCTATTACGGTGCCAGAGA
IGH_HiC_scaffold_2_arrow_ctg1	+	1094449	1094478	CACAGTG	GACACAAAC	IGHV3-30*01	+	89.1525	36	1094154	ACGTGCAGCTGGTGGAGTCTGGAGGAGGCCTGGTGCAGCCTGGGGGGTCCCTGCGACTCTCCTGTTCAGCCTCTGGGTTCACCTTCAGTAGCTATGCGATGCACTGGATCCGCCAGGCTCCAGGAAAGGGGCTGGAGTGGGTTGCAGTTATATCGTATGATGGAAGTCAGAAATACTACGCTGAATCTGTGAAGGGCCGATTCACCATCTCCAGAGACAACTCCAAGAACATTCTGTACCTGCAAATGAGCAGCCTGAGAGCTGAGGACACAGCCACCTATTACTGTGCTAGAGA
IGH_HiC_scaffold_2_arrow_ctg1	+	834423	834453	CACAGTG	CACAAACCT	IGHV4-30-2*01	+	77.8523	32	834127	CAAGTGCAGCTGCAGAAGTCAAGACCTGGGCTGGTAAAGCCCACACGAACACTGTCCCTCACCTGTGCTGTGTCTGGTTACTCCATATCTAGTAATTACTGCTGGAGCTGGATCCGTTAGCCCACAGGGAAGCAGCTGGAGTGGATAGGGTGCATAAATTATGATGGTAGCACTTACTACAGCCCATCCCTCAAGAGTCGATTGTCCATCTCCAGACCCACATCCAAGAACCAGTTCTCCCTGCAGCTGAGCTCCCTGACCACCCAGGACAGGGCCACCTATTACTGTGCCAGAGG
IGH_HiC_scaffold_2_arrow_ctg1	+	179141	179170	CACAGTG	GACACAAAC	IGHV3-72*01	+	87.4172	47	178839	GACGTGCAGCTGGTGGAGTCTGGGGGAGGCCTGGTGCAGCCTGGGGGGTCCCTGCGACTCTCCTGTGCAGCCTCTGGATTCACCTTCAGTGACTACTACATGCACTGGGTCCGCCAGGCTCCAGGGAAGGGGCTGGAGTGGGTTGCTCTTATAAGAAACAAAGCTAATAGTTACACCACTGAATATGGAGCATCTGTAAAAGGCCGCTTCACCATCTCCAGAGACGACGCAAAGAGCATGCTCTACCTGCAAATGAGCAGCCTGAAAGCCGAGGACACAGCCACCTATTACTGTACTAGAGA
IGH_HiC_scaffold_2_arrow_ctg1	+	312450	312479	CACAGTG	GACACAAAC	IGHV3-23*01	+	84.4595	38	312154	GAGGTGCAGCTGGTAGAGTCTGGGGGAAGCCCGGTGCAGCCTGGGGTGTCCCTGCAACACTCCTGTGCAGCCTCTGGATTCACCTTCAGTGACCACTGGATGCACTGGGTCTGCCAGGCTCCAGAGAAGAGGCTGGAGTGGGTTGCAGCAATTAGCAGTAGTGGTGGTAGCACCTACTACGCAGACTCTGTGAAGGGCCGTTTCACCATCTCCAGAGACAACTCCAAGAACACCCTGTACCTGCAAATGAGCAGCTTGAGAACCGAGCACATGGCCACCTGTTACTGTACTAGAGA
IGH_HiC_scaffold_2_arrow_ctg1	+	51296	51325	CACAGTG	GACACAAAC	IGHV4-28*01	+	79.5987	35	50997	CAGGTGAAGCTGCAGGAGTGGGGTACTGGCCTGGTGAAGCCCTCAGAGACCCTGTCCCTCACCTGTGCTGTGTATGGATTCACCATCACAACCAGTTATTACTGCTGGAACTGGATCCGTCAGACCCCAGGGAAGGGGCTGGAGTGGATAGGGTGCATATGTTATGATGGTAGCACTAACTACAGCCCATCCCTCAAAAGCCGAGCATCCATCTCCAGAGACACATCCAAGAACCAGTTCTCCCTGCAGCTGAGCTCCCTGACCACCCAGGACACGGCCACCTATTACTGTGCCAGAGA
IGH_HiC_scaffold_2_arrow_ctg1	+	970499	970528	CACAGTG	GACACAAAC	IGHV3-53*01	+	88.5135	61	970203	GAGGTGCAGCTGGTGGAGTCTGGGGGAGGCCTGATGCAGCCTGGGGGATCCCTGCGACTCTCCTGTGCAGCCTCTGGATTCACCTTCAGTAGCTACTGGATGCACTGGGTCCGCCAGGCTCCAGGGAAGGGGCTGGAGTGGGTTGCAACAATTAACTATGGTGGTGGTAGCACCTACTACCCAGACTCTGTGAAGGGCCGATTCACCATCTCCAGAGACAACTCCAAGAACACGCTGTACCTCCAAATGAGCAGCCTGAGAGCCGAGAACACGGCCACCTATTACTGTGCTAGAGA
IGH_HiC_scaffold_2_arrow_ctg1	+	1364005	1364035	CACAGTG	CACAAAACT	IGHV4-30-2*01	+	74.4108	22	1363713	AGGTGCAGCTGCAGTATTCAGGACCAGGGTGGTGAAGACCTCACAGACCTGTTCCTCACCTGTGCTGTCTCTGGTTACTCCATCACCATTGGTTTCAGCTGGAGCTGGATCCATCAGCATCCGGGAAAGGTGCTGCAGTGAATGGGGCACGCTCTTCATAATGGAGGCACAACTTACTACCCCTCCATGAAGAGTCAAGTCACCATGTCTAGAGACACATGCAAGAATCAGTTCTCCTACAGTGGATTTCTGTGACCAATAAGGGTGTGGCTGTGTATTACTGTGCTGGACT
IGH_HiC_scaffold_2_arrow_ctg1	+	974191	974221	CACAGTG	CACAAACCT	IGHV3-11*01	+	80.5369	31	973896	ACGTGCAGCTGGTGGAGACCGGGAGAGGCCTGGTGCAGCCTGGGGTCCCTGTGACCCTCCAGTGCAGCCTCTGGATTCACCTTCAGTGACTAGTGAATGAGCCGGTTCCTGCCACCCTCCAAGGAAGGGGCTGCAGTGGATCTCAGACATTAGTCATAGTCTTGGTACCCCATTAACTATAAGAAGTCTGTGAGGGAAAATTCACCATCTCCAGAGACAACTCCAAGAACACGCTGTACCTGCAAATGAGCAGCCTGAGAACCAGGGACACGGCCACCTATTACTGTGCCAGAGA
IGH_HiC_scaffold_2_arrow_ctg1	+	581449	581478	CACAGTG	GACACAAAC	IGHV4-4*01	+	71.8121	21	581151	AGTTGCAGCTGCTGGAGTCGGAACCTGGCCTGGAGAAGCCCTCAGAGACACTGTCCCTCACCTGTGCTGTGTCTGGAATCTCCATCATGACCATTGGTCATGGCTGGAATTGGATTTGTCAACTCACAGGGAAGGGGCTACAGTGGATAAGGCGCATATGTAGTGGTGGTGATACTTACTCTGGTGCATCCCTGAAGAGTTGAGTGTCCACTTCCAGATACACCTCAAAGTACCAGTTCTCCCTGCAGCTGAGCTCCCTGACCACCCAGGACACAGCCACATATTACTGGGCCAGAGA
IGH_HiC_scaffold_2_arrow_ctg1	+	60792	60823	CACAGTG	CACAAACCT	IGHV4-30-2*01	+	73.7374	19	60499	CAGGTGCAATTGCAGCATTCAGGATCAGAGTGGTGAAGACCTCACAGACCTGTTCCTCACCTGTGCTTTCTCTGGTTACTCCATCACCATTGGTTACAGTTGGAACTGGATCCATCAGCCTCCAGAAAAGGGACTGCAGTGAATGGGGCACATTCTTGGTAATGGAGGCACAACTTACTACCCCTCCCTGAAGAGTGGAGTCACCATTTCCAGAGACACATGCAAGACACAGTTCCACTGCAGTGGAGTTCTGTGACGAATAAGGATGTGGCTGTGTATTACTGTGCTGGACT
IGH_HiC_scaffold_2_arrow_ctg1	+	1240833	1240862	CACAGTG	GACACAAAC	IGHV4-30-2*01	+	75.5034	21	1240539	AGGAGCAGCTGCAGGAGTCAGGACCTGGCCTGGTGAAGCCCTCACAGATGCTGTGCTTTACCTGTGTTGTGTCTGGATTCTCCATCACAACCAGCTATTACTGCTGGAGCTGGATTTGTCAACTCACAGGGAAGGGGTTGGAGTGGATGGGGCTCATATGTTATGATGGCTCTAACTACAGCCCGTCCCTCAAGAGCCGAGTGTCCATCTCCAGAGACATGTCCAATACCAGTTCTCCCTGCAGCTGAGCTCCCTGACCACCCAGGACATGTCCACCTATTACTGTGCCAGAGA
IGH_HiC_scaffold_2_arrow_ctg1	+	1372458	1372487	CACAGTG	GACACACAC	IGHV4-28*01	+	78.2609	28	1372161	CAGGTGCAGCTCCAGGAGTCGGGACCTGGCCTGGTGAAGCCCTCGCAGACCCCTTCCCTCACCTGTGCTGTGTCTGGATTCTCCATGACAACCAGTGGTTACTGCTGGAGCTGGATCTGTCAGCCCCAGGGAAGGGGCTAGAGTGGAGAGGGGGAATATGTTATTATGGTAGAACTTACTACAGCCCATGCTCAAAAGTCGAGCATCCATCTCCAGAGACACGTCCAAGAACCAGTTCTCCCTGCAGCTGAGCTCCCTGACCACCCAGGATACAGGCACCTATTACTGTGCCAGAGA
IGH_HiC_scaffold_2_arrow_ctg1	+	717170	717199	CACAGTG	GACAAAAAC	IGHV4-30-2*01	+	72.2408	18	716881	CAGGTTCAGCTGGATGAGTCAGAGCCTGGCCTGGTGAAGCCCTCAGAGACCCTCTTCCTCACCTGTGCTGTTTCTGAATTCTCCATCACTACCAATGGTTATGACTAGAACTGGATCCATCTACCCCCAGGGAAGGGGCTGCAGTGAATTGGCCTGATGGTAGCACTAACGATAGCCCATCCCTCAAGAGCTGAGTGTCCATCTCCAGAGAAATGTCCAAAAACCAGGTCTCTCTGCAGCTGAGTTCCCTGACCAACTTGGTCATGGCCACCTATTACTGTGCCAGAGA
IGH_HiC_scaffold_2_arrow_ctg1	+	982286	982315	CACAGTG	GACACAAAA	IGHV4-30-2*01	+	77.592	23	981989	CAGGTGCAGTTGCAGGAGACAGGACCTGGCTTGATGAAGCCCTCACAGACCCTGTCCCTCACCTGTACTGGGTATGGATTTTCCATCACAACCAGTGGTTACTGCTGGAGCTGAATCCGGCAGCCCCTAGGGAAAGGCTGGAGTGGATAGGGTTCATAAATTATGGTGGTAGCACTTACTGCAGCCCATCACTCAAGAGTGAGCATCCATCTCCAGAGACACGTCCAAGAACCAATATTCCCTACAGATGAGCTCCCTGACCACCCAGGACATGGCCACCTATTACTGTGCCAGAGA
IGH_HiC_scaffold_2_arrow_ctg1	+	1114479	1114509	CACAGTG	CACAAAACT	IGHV4-30-2*01	+	74.4108	22	1114187	AGGTGCAGCTGCAGTATTCAGGACCAGGGTGGTGAAGACCTCACAGACCTATTCCTCACCTGTGCTGTCTCTGGTTACTCCATCACCATTGGTTTCAGCTGGAGCTGGATCCATCAGCATCCGGGAAAGGTGCTGCAGTGAATGGGGCACACTCTTCATAATGGAGGCACAACTTACTACCCCTCCATGAAGAGTGAAGTCACCATATCTAGAGACACATGCAAGAATCAGTTCTCCTACAGTGGAGTTCTGTGACCAATAAGGGTGTGGCTGTGCATTACTGTGCTGGACT
IGH_HiC_scaffold_2_arrow_ctg1	+	722453	722482	CACAGTG	GACACAAAC	IGHV3-72*01	+	87.4172	47	722151	GAGGTGCAGCTGGTGGAGTCTGGGGGAGGCCTGGTGCAGCCTGGGGGATCCCTGCGACTCTCCTGTGCAGCCTCTGGATTCACCTTCAGTGACTACTACATGCACTGGGTCCGCCAGGCTCCAGGAAAGGGGCTGGAGTGGGTTGCTCTTATAAGAAACAAAGCTAATGGTTACACCACTGAATATGGAGCATCTGTAAAAGGTCGGTTCACCATCTCCAGAGACAACTCCAAGAACACGCTGTACCTGCAAATGAGCAGCCTGAGAGCCGAGGACACGGCCACCTATTACTGTGCTAGAGA
IGH_HiC_scaffold_2_arrow_ctg1	+	1247253	1247282	CACAGTG	GACACAAAC	IGHV4-30-4*02	+	74.2574	15	1246954	CTGGATTAGCTCCAGGAGTCGGGACCTGGCCTTGTGAAACCCTTGCAGACTCTGTCCCTCACCTGTGCTGTGTCTGGATATCTCCATTACAACCAGGTATTACTGCTGGAGCTGGATCTGTCAGCCCTCAGGGAAAGGCTGGAGTGGATGTGGCGCCTATGTAGTGATGGTACCACTAACTACAGTCCATCGCTCAAGAGCCGAGCGTCCATCTCCAGATGGACGTCCAAGAACCAGGTCTCCCTGCTGCTGAGCTCCCTGACCACCCAGGATGCAGCCACCTATTACTGTGTCAGAGA
IGH_HiC_scaffold_2_arrow_ctg1	+	596184	596213	CACAGTG	GACACAAAC	IGHV3-72*01	+	84.9498	26	595885	GTGGTGCAGCTGGTGGAGTCTGGGGCAGGCCTGGTGCAGCCTGGAGGATCCCTGCGACTCTCCTATGCAGCCTCTGGATTCACCTTCAGTGGCTACTACATGGACTGGGTCCGCCAGGCCCCAGGGAAGGGGCTGGAGTGGGTTGTTCTTATAAGAAACAAAGCTAATAGTTACACCAAGGAATATGGTTGCATCTGTAAAAGGCTGATTCATCATCTTCAGAGATGAGGCAAAGAACATGCTCTACCTGCTAATGAGCAGCCTGAGAGCTGAGGACACAGCCACCTATTACTGTGCCA
IGH_HiC_scaffold_2_arrow_ctg1	+	1122749	1122778	CACAGTG	GACACACAC	IGHV4-28*01	+	78.9298	28	1122451	CAGGTGCAGCTCCAGGAGTCGGGACCTGGCCTGGTGAAGCCCTCGCAGACCCCGTCCCTCACCTGTGCTGTGTCTGGATTCTCCATGACAACCAGTGGTTACTGCTGGAGCTGGATCTGTCAGCCCCCAGGGAAGGGGCTAGAGTGGAGAGGGGGAATATGTTATTATGGTAGAACTTACTACAGCCCATCCTCAAAAGTTGAGAATCCATCTCCAGAGACACGTCCAAGAACCAGTTCTCCCTGCAGCTGAGCTCCCTGACCACCCAGGATACAGGCACCTATTACTGTGCCAGAGA
IGH_HiC_scaffold_2_arrow_ctg1	+	1387571	1387600	CACAGTG	GACACAAAC	IGHV3-69-1*01	+	88.5135	42	1387275	GACGTGCAGCTGGTGGAGTCTGGGGGAGGCCTGGTGCAGCCTGGGGGGTCCCTGCGACTCTCCTGTGCAGCCTCTGGATTCACCTTCAGTGACCACTGGATGCACTGGGTCCGCCAGGCTCCAGGGAAGGGGCTGGAGTGGGTTGCAACAATTAACAAGGATGGTGGTAGCACCTACTACCCAGACTCTGTGAAGGGCCGATTCACCATCTCCAGAGACAACTCCAAGAACACGCTGTACCTGCAAATGAGCAGCCTGAGAGCCGAGGACACGGCCACCTATTACTGTGCCAGAGA
IGH_HiC_scaffold_2_arrow_ctg1	+	339660	339689	CACAGTG	GACACAAAC	IGHV3-64*01	+	75.4209	25	339365	GTGGTGCTGCTGGTGGAGTCTGGGGGAGGTCTTGTGCAGCCTGGGGGATCCCAGGGACTCTCCTGTGCAGCCTCTGGATTTAATTTCTGTAGCCATATAATGAACTGGATCACCCAGGCTCCAGAAAATGGACTAAAGTGTATGTCAGTAATTACTGAGCACAGTATTAACATAAATTATGGTGACTTTTTGAAGGTCAGATGCCCCATCTCTAGAGTCAACTCCAAGAATATGGTGTTCTTGCAAATGAGAAGTCTGAGAACTGAGGACATGGCCACCTCTTATGTGCCACAGA
IGH_HiC_scaffold_2_arrow_ctg1	+	995742	995772	CACAGTG	CACAAACCT	IGHV4-30-2*01	+	75.3333	35	995443	CTGTGTACAGCTGCAGGAGTCAGGAGCTGGCCTGGTGAAGTCCACCCAGTCCCTGTACCTCACCTATGCTGTGTCTGGATTCTCCATCATGGGTGCTCATTAATACTAGATCTGGATCCTTCAGGCCCCGGGAAGGGACTGGAGTGGATAGGGTGCATATGGTATGATGGTTGCACTTACTACTGCCCATCCCTCCAAAGCCGAGCATCCATCTCCAGAGACACATCCAAGAACCAGTTCTCCCTGCAGCTGAGCTCCCTGACCACCCAGGAGATGGCCACCTATTACTGTGCCAGAGA
IGH_HiC_scaffold_2_arrow_ctg1	+	1259462	1259491	CACAGTG	GACACAAAC	IGHV4-28*01	+	83.4459	29	1259166	CAGGTGCAGCTGCAGGAGTCAGGACCTCGTCTGGTGAAGCCCTCAGAGACCATGTCCCTCACCTGTGCTGTGTCTGGTTACTCCATCTCTAGTAGTTACTGCTGGAGCTGGATCCGTCAGCCCCCAGGGAAGGGGCTGGAGTGGATAGGGTACATATGTAGTGGTGGTAGCACTTACTACAGCCCATCCCTCAAGAGCCGAGCGTCCATCTCCAGAGACACGTCCAAGAACCAGTTCTCCCTGCAGCTGAGCTCCCTGACCACCCAGGACACGGCCACCTATTACTGTGCCAGAGA
IGH_HiC_scaffold_2_arrow_ctg1	+	473678	473707	CACAGTG	GACACAAAT	IGHV4-30-4*02	+	75.3333	29	473379	CTGGACTAGCTCCAGGAGTCGGGACCTGGCCTTGTGAAACCCTTGGAGACTCTGTCTCTCACCTGTGCTGTGTCTGGATTCTCCATCACAACCAAGTATTACTGCTGGAGCTGGATCAGTCAGCCCCCAGGGAAGGGGCTGGAGTGGATGTGGCACCTGTGTAGTGGTGGTAGCACTAACTACAGTCCATCACTCAAGAGCCAAGCGTCCATCTCCAGAAACACGTCCAAGAACCAGTTCTTCCTGCAGCTGAGATCCATGACCAATCAGGACACAGCTACCTATTACTGTGCCAGAGA
IGH_HiC_scaffold_2_arrow_ctg1	+	605131	605160	CACAGTG	GACACAAAC	IGHV3-7*01	+	87.3288	46	604839	GATGTGCAGCTGGTGGAGTCTGGGGGAGGCCTGGTGCAGCCTGGGGGATCCCTGCGACTCTCCTGTGCAGCCTCTGGATTCACCTTCAGTGACTACTGGATGAACTGGGTCCGCCAGGCTCCAGGGAAGGGGCTGGAGTGGGTTGGTGATATTAACGAGGATGGTGGTGAAACAAACTATGCAGACTCCGTGAAGGGCCGATTCACCATCTCCAGAGACAACTCCAAGAACACGCTGTACCTGCAAATGAGCAGCCTGAGAGCTGAGGACACGGCCACCTATTACTGTGCCA
IGH_HiC_scaffold_2_arrow_ctg1	+	740993	741022	CACAGTG	GACACAAAC	IGHV3-23*01	+	83.4459	42	740697	GACATGCATATGGTGGAGACTGGGGGAGGCCTGGTGCAGCCTGGGGTGCCTCTACAACTCTCCTGTGCAGCGTCTGGATTCACCTTCAGTAGCTATGGGATGAACTGGATCTGCCTAACTCAAGGGAAGGGGCTGGAGTGGGTAGCAGCAATTATCATTGATGGTGGTAGCACCTACTACCCAGACTCCATGAAGGGCCAATTCACCATCTCCAGAGACAACTCCAAGAACACACTGTACCTGCAAATGAGCAGCCTGAGAGCCGAGGACACAGCCACCTATTACTGTGCTAGAGA
IGH_HiC_scaffold_2_arrow_ctg1	+	1136976	1137005	CACAGTG	GACACAAAC	IGHV3-72*01	+	79.9342	41	1136672	GAGCTGCTATAGAACAGGAGGAGGGGGAGTCCTGGTGCAGCCTGAGGGGGTCCCTGCCACTCTCCTGTGCAGCCTCTGGATTCACCTTCAGTGACTACTGGATGTGCTGGGTCCAACAGGCTCCAGGGAAGGGGCTGGAGTGGGTTGCTCTTATAAGAAACAAAGCTAATAGTTACACCACTGAATATGGAGCATCTGTAAATGGTCGATTCACCATTTCCAGAGACAACACAAAGAACACGCTCTACCTGCAAACGAGCAGCCTGAAAGCCGAGGACATGGCCACCTGTTACTGTTCCAGAGT
IGH_HiC_scaffold_2_arrow_ctg1	+	351102	351131	CACAGTG	GACACAAAC	IGHV4-55*01	+	75.4967	35	350806	CAGGTGCAGCTGCAGGAGTTAGAACCTGGCCTGGTGAAGCCCTCAGAGACTCTGTCCCTCACCTCTGCTGTGTCTAGATTCTCCATCCCGACCAGTGGTTATGGCGGAGTTGGATCTGTATTCACAGGAAAGAGGCTGGAGTGGATAGGGTGCATATGGAGTGATAGCAGGAGTTACTACAGCCCATCCCTCAAGAGCCGTGTGTCCATCTCCAGAGACACATCCAAGAACCAGTTCTCCCTGCAGCTGAGCTCCCTGACCACCCAGGACATGGCCGCCTATTACTGTGCCAGAGA
IGH_HiC_scaffold_2_arrow_ctg1	+	879004	879033	CACAGTG	GACACAAAC	IGHV4-30-2*01	+	78.2609	30	878709	CAGATGCAGCTTCAGAAGTCGGGACCTGGCCTGGTGAAGCCCTCACCGACACTGTCCCACACCTGTGCTGTGTGTGGTTACTCCATCTCTAGTGGTTACTGCTGGAGCTGGATCCATCTGCCCCCAGGGAAGGGGCTGGGTGGATAGGGTGCATATGTTATGATGGTAGCACTAACTACAGCCCATCCCTCAAGAGCCGAGTGTCCATCTCTAGAGACTCATCCAAGAACCAGTTCTCCCTGCAGCTGATCTTCCTAACCACCCAGGACACGGCTACCTATTACTGTGTCAGAGA
IGH_HiC_scaffold_2_arrow_ctg1	+	355181	355210	CACAGTG	GACACAAAC	IGHV3-21*01	+	86.4865	35	354888	GAGGTGCAGCTGGTGGAGTCTGGGGGAGGCCTGGTGCAGCCTGGGGGTTCCCTGCGACTCTCCAGTGCAGCCTGTGGATTCACCTTCAGTAGCTACTGGATGAACTGGGTCCACCAGGCTCCAGGGAAAGGCCTGGAGTGGGTTGCAGCAATTAGCAATGGTGGTAGTTCCTTCTATCCAGACTCTGTGAAGGGCTGATTCACCATCTCCAGAGACAACTCCAAGAACACGCTGTACCTGCAAATGAGCACCCTGAGAGCCGAGGACACGGCCACCTATTACTGTGCTAGAGA
IGH_HiC_scaffold_2_arrow_ctg1	+	224781	224810	CACAGTG	GACACAAAC	IGHV3-69-1*01	+	88.5135	39	224485	GAGGTGCAGCTGGTGGAGTCTGGGGGAGGCCTGGTGCAGCCTGGGGGATCCCTGCGACTCTCCTGTGCAGCCTCTGGATTCATCTTCAGTGACTACTGGATGTACTGGTTCCGCCAGGCTCCAGGGAAGGGGCTGGAGTGGGTCTCAGACATTAGTGGTAGTAGTGCTACCATTAACTATGCGGACTCAGTGAAGGGTCGATTCACCATCTCCAGAGACAACTCCAAGAACACGCTGTACCTGCAAATGAGCAGCCTGAGAGCCGAGGACACAGCCACCTATTACTGTGCTACAGA
IGH_HiC_scaffold_2_arrow_ctg1	+	1278075	1278105	CACAGTG	CACAAACCT	IGHV4-28*01	+	74.5819	28	1277776	CAGGAGCAGCTGCAGTAGTCCAGACTTCGCCTCGCAAATCCTTTGGAGACCCTGTCCCTCACCTGTGCTGTGTCTGGATTCTCCATCACAACAAGGTAATACTGCTGGCACTGGATCCACCATCCCCTAGGGAAGGGGCTGGAGTGGATAGGGCACATATGTTATGGTGGTAACAGTTACTACAGCTCATCCTTCAAGACCCGAGCATCCATCTCCAGAGGCATGTCCAAGAACCAGTTCTCCCTGCAGCTGAGCTCCCTGACCACCCAGGACACAGTAACCTATTATACTGCCAGAGA
IGH_HiC_scaffold_2_arrow_ctg1	+	234523	234553	CACAGTG	CACAAACCT	IGHV3-69-1*01	+	82.4916	26	234226	GAGGTGCAGCTGGTGCAGCCTGGAGGAGGCCTGGTGCAGCCTGGGGGGTCCCTGCAACTCTCCTGTGCAGCCTCTGGATTCATCTTCAGGGACTAGTGATTGAGCTGGTTCCTGCCACCCTCCAAGGAAGGGGCTAGAGTGGATCTCAGACATTAGCAGTAATAGTGCTACCATTAACAATGCGGACTCCATGAAGGGCCAATTTGCCATCTCCAGAGACAACTCCAAGAACACGCTGTACCTGCAAATGAGCAGCCTGAGAGCTGAGGATACGGCCACCTATTACTTTGCCAGAGA
IGH_HiC_scaffold_2_arrow_ctg1	+	630294	630323	CACAGTG	GACACAATC	IGHV4-4*07	+	73.6486	24	630012	CAGGTGCAGCTGCAGGAGTCTGGACCTGTCATGGTGATGTCCTCGCAGATGATGTCCCTCAACTGTACTGTGTATGGTTATGCCATGTCTAGTGGTTACTGATGAAGCTGGATCTGTCTGGCCCCAGGGAAGGGGTTGGAGTGGATATGGTGTATATGCATACTACGGTCCATCCCTCAAGAGCTGAGCATTCATATCCAGAGACACGTCCAAGAACCAGTTCTCGCTGCAGCTGAGCACCCTGATCACTCAGGACACGGCCACCTATTACTGTGCCAGAGA
IGH_HiC_scaffold_2_arrow_ctg1	+	1287048	1287077	CACAGTG	AACACAAAC	IGHV3-30*02	+	89.8305	40	1286753	ACGTGCAGCTGATGGAGTCTGGGGGAGGCCTGGTGCAGCCTGGGGGAACCCTGCGACTTTCCTGTGCAGCCTCTGGATTCTCCTTCAGTAGCTATGGGATGAACTGGATCCGCCAGGCTCCAGGGAAGGGGCTGGAGTGGGTTGCAGTTATATGGTATGATGGAAGTCAGAAATACTATGCTGACTCTGTGAAGGGCCGATTCACCATCTCCAGAGACAACTCCAAGAACATGCTGTACCTGCAAATGAGCAGCCTGAGAGCCGAGGACACAGCCACCTATTACTGTGCCAGAGA
IGH_HiC_scaffold_2_arrow_ctg1	+	633084	633113	CACAGTG	GACTCAAAC	IGHV3-74*01	+	73.8255	15	632789	GATGTGCAGCTCTTGGAGTGTTGTGGAGGCCTGGTGCAGATTAGGGGGGGTCCCAGTGACTCTCCTGTGCATCCTCGGGATTCACCTTCTGGGATTACTGGATGGACTCTGTCCACCTAGTTTCACGGAAATGGCTGGAGTGAATTGGGGATATTAACAAATTGTTTTAAAACAAATTTGCCAACTCCATGAAGGGCTGATTTACCATCTCCACAGACAACTCCAAGAACATGCTGTACGTGAAAATGAGCAGCCTCAGAGCTGAGGACACAGCCACCTATAACTGTGCCAGAGA
IGH_HiC_scaffold_2_arrow_ctg1	+	1026819	1026848	CACAGTG	GACACAAAC	IGHV3-64*03	+	76.3514	30	1026556	GAGGTGCAGCTGGTGGAGTCTGGGGGAGGCATGGTGCAGCTTGGGGGTCCCTGTGCAGCCTCTGAATTCACCTGATTCCAACAGGTTCCAGGGAAGGGACTGGAGTGGGTTACAGCAATTAGCAGTAGTGGTGGTAGCACCTACTACCCAGACTCCATGAGTGGCCGATTCACCATCTCCAGAGACAACTCCAAGAACACGCTGTACCTGCAAATGAGCAGCCTGAGAGCCGATGACACATCCACCTATTACTGTACTAGAGA
IGH_HiC_scaffold_2_arrow_ctg1	+	895869	895898	CACAGTG	GACACAAAC	IGHV4-4*01	+	75	35	895565	CAGGTGCAGCTGCAGGAGTTAGAACCTGGCCTGGTGAAGCCCTAAGGGACACTGTCCTGTCCCTCACCTGTGCTGTGTCTGGATTCTCCATCTCGATCAGTGGTTATGCCTGGAGTTGGATCTGTCTACTCGCAGGGAAGGGGCTGGAGTGGATAGGGGAAATATGGAGTGATGGCAGCACTAACTACAGCCCATCCAAAAAGTGCTCGGCGTCCATCTCCAGAGACACATCCAAGAACCAGTTCTCCCTGCAGCTGAGCTCCCTGACCACCCAGGACATGGCCACTTATTTCTGTGCCACAGG
IGH_HiC_scaffold_2_arrow_ctg1	+	111408	111437	CACAGTG	GACACAAAT	IGHV4-30-2*01	+	78.8079	35	111114	CAGGTGCAGCTGCAGGAGTCTGGTCCTGGCCTGGTGAAGACCTCACAGACCCTGTCCCTCACCTGTGCTGTGTCTGGTTACTCTATAACAAGTAGTGATTACTGCTGGAACTGGATCTGTCAGCCCCCAAGGAAGGGGCTGGAGTGGACTGGAGAAATATGTAGTAGTGATGGTAACACTTACTACACTCAAGAGCCGAGTGTCCATCTCCAGAGACACATCCAAGAACCAGTTCTCCCTGCAGCTGAGCTCCCTGACCACCCAGGACACGGCCACCTATTACTGTGCCAGAGA
IGH_HiC_scaffold_2_arrow_ctg1	+	505422	505452	CACAGTG	CACAAACCT	IGHV3-21*01	+	79.5918	38	505132	GAGGTGCAGCTGGTGGAGTCTGGGGAGGCGTGGTGCCTTCTGGGGGATCCCTGCGACTCTCCTGTGCAGCCTCTGGATTCACCTTCAGTAACTACTGGATGAGCTGGGTCCACCAGGCTCCAGGGAAGGAGCTGGAGTGAATCTCCAACATTAGTGGTAGTTGTTGTAAAATTAACTGTGTTGACTCAGTGACAGGCTGATTCCATCTCCAAGAAGAAAGTCAAGGACAGGCTGTACCTGCAAATGAGAGTCTGAGAACCAAGGACACTGAAAACTATTACTGTGCCAGA
IGH_HiC_scaffold_2_arrow_ctg1	+	374509	374538	CACAGTG	GACACAAAC	IGHV3-48*01	+	86.4865	45	374213	GACGTGCAGCTGGTGGAGTCTGGGGGAGGCCTGGTGCAGCCTGGGGCATCCCTGCGACTCTCCTGTGTAGCCTCTGGATTCACCTTCAGTGACTATGGGATGAACTGGGTCCGCCAGGCTCCAGGGAAGGGGCTGGAGTGGGTTGGGTATATTAGCAGTGGTGGTGGTAGCACCTACTATCCAGACTCAGTGAAGGGCCGATTCACGATCTCCAGAGACAACTCCAAGAACACCCTGTATCTGCAAATGAGCAGCTTGAGAACCGAGGACACCGCCACCTATTACTGTACTAGAGA
IGH_HiC_scaffold_2_arrow_ctg1	+	899709	899739	CACAGTG	CACAAACCT	IGHV3-23*01	+	88.5522	60	899412	GAGGTGCAGCTGGTGGAGTCTGGGGGAGGCCTGGTGCAGCCTGGGGGGGTCCCTGAGACTCTCCTGTGCAGCCTCTGGATTCACCTTCAGTAGCTACTGGATGAGCTGGGTCCGCCAGGCTCCAGGGAAGGGGCTGGAGTGGGTTGGGTATATTAGCAATGGTGGTGGTAGCACCTACTACCCAGACTCTGTGAAGGGCCGGTTCACCATCTCCAGAGACAACTCCAAGAACACGCTGTACCTGCAAATGAGCAGCCTGAGAACCAAGGACACGGCCACCTATTACTTCGCCAGAGA
IGH_HiC_scaffold_2_arrow_ctg1	+	375791	375820	CACAGTG	GACACAAAC	IGHV3-30*01	+	80	26	375498	ACGTGCAACTGGTGGAGTCTGGGGGAGGCCTGGTTCAGCCTGGGGGTACCCTGTGACTCTCCTGTGCAGCCTCGGGATTCACCTTCAGTAGCTACCCGATGAACTGGTTCCGCTTGACTCTGTGGAAATCACTGGGGTTGTTGGGGATATTAACAAAGAAGGAAGTAAAACAAACTATGCTGACCCAATGAAGGGCAATTCACCATTTCCAGAGACAATTCCAAGAACAGGCTCTACCTGCAAATGAGCAGCCTGAGAGCTGAGGACACAGCCACCTATTACTGTGCCAGAGA
IGH_HiC_scaffold_2_arrow_ctg1	+	1033329	1033358	CACAGTG	GACACAAAC	IGHV4-30-2*01	+	79.9331	23	1033030	CAGGTGCAGCTACAGGAGTCAGGACCTGGCCTGGTGAAGCCCTCACAGACCCTGTCCCTCACCTGTACTGTGTCTGGATCCTCCATCACGACCATTGGTTACTGCTGGAGCTGGATCCGTCAGTCCCCAGGGAAAGGGCTGGAGTGGATAGGGTGCATAAATTATGGTGGTAGCACTTACTACGGCCCATCACTCAAGAGCCGAGCATCCATCTCCAGAGACACGTCCAAGAACCAATACTCCCTACAGCTGAGCGCCCTGACCACCCAGGACACGGCCACCTATTACTGTGCCAGAGA
IGH_HiC_scaffold_2_arrow_ctg1	+	1295619	1295649	CACAGTG	CACAAACCA	IGHV4-30-2*01	+	77.9264	27	1295323	CAGGTGCAGCTTCAGGAGTCAGGAGCTGGCCTGGTGAAGCCCTCACAGTCCCTAACCCTCATCTGTGCTGTGTCTGGTTACTCCATCTCTAGTGATTACTGCTGGAGCTGGATCCGTCAGCCCCCAGGGAAAGGGCTGGAGTGGATAGTGTGCATATGTAGTAATGGTAACAATTACTACAGACCATCCCTCAAGAGCAGAGTGTCCATCTCCAGAGACTCGTCCAAGAACTAGGTCTCCCTGCAGCTGAGCTCCCGGACCACCCAGAACACGGCTACCTATTACTGTGCCAGAGA
IGH_HiC_scaffold_2_arrow_ctg1	+	1432887	1432916	CACAGTG	GACACAAAT	IGHV4-30-4*02	+	74.1722	15	1432589	CTGGATTAGCTCCAGGAGTCGGGACCTGGCCTTGTGAAACCCTTGCAGACTCTGTCCCTCACCTGTGCTGTGTCTGGATTCTGCATTACAACCAGGTATTACTGCTGGAGCTGGATCTGTCAGCCCTCAGGGAAAGGCTGGAGTGGATGTGGCGCCTATGTAGTGATGGTAGCACGAACTACAGTCCATCACTCAAGAGCTGAGCATCCATCTCCAGATGGACGTCCAAGAACCAGGTCTCCCTGCAGCTGAGCTCCCTGACCACCCAGGATGCAGCCACCTATTACTGTGTCAGAGA
IGH_HiC_scaffold_2_arrow_ctg1	+	518815	518844	CACAGTG	GACACAAAC	IGHV4-30-2*01	+	78.9298	20	518516	CATGTGCAGCTGCAGGAGTCAGGACCTGGCCTCTTGATGCCCTCAAAGACCCTGTCCCTCACCTGTGCTGTGTCTGGATTCTCCATCACACCCAGTGGTTACTGCTGGAGCTGAATCCATCAGCCCCCAGGGAAGGGGCTAGAGTGGATAGGGTACATATGTTATGGTGGTAGCACTTACTACAGTCCAGCCCTCACGAGTCGAGTGTCCATCTCCAGAGACATGTCCAAGAACCAGATCTCCCTGCAGCTGAGCTCCCTGACCACCAAGAACATGGCCACCTATTACTGGGTCAGAGA
IGH_HiC_scaffold_2_arrow_ctg1	+	913666	913695	CACAGTG	GACACAAAC	IGHV3-74*01	+	85.473	54	913370	GATGTACAGCTGGTGGAGTCTGGAGGAGGCCTGGTGCAGCCTGGGGGATCCCTGAGACTCTCCTGTGCAGCCTCTGGATTCACCTTCAGTGACTACTGGATGCACTGGGTCCGCCAGGCTCCAGGGAAGGGGCTGGAGTGGGTTGGTAATATTAACACAAATGGTGGTAGCACCAACTACAAAGACTCTGTGAAGGGCCGATTCACCATCTCCAGAGACAACTCCAAGAACACGCTCTACCTGCAAATGAGCAGCTTGAGAGCCGAGGACACATCCACCTATTACTGTGCTAGAGA
IGH_HiC_scaffold_2_arrow_ctg1	+	915720	915749	CACAGTG	GACACAAAC	IGHV3-7*01	+	82.0946	47	915426	GAGGTGCAGCTGGTGGAGTCTGGGGGAGGCCTGGTGCAGCCTGGGGGGTCCCTGCGACTCTCCTGTGCAGCCTCTGGATTCACCTTCAGTAGCTACTGGATGAACTGGTTCTGCTTGGCTCTGCAGAATTCACTGGGGTTGTGGAGGATATTAACAAAGAAGGAAGTAAAACAAACTATGCTGACTCAATGAAGGGTGATTCACCATTTCCAGAGACAACTCCAAGAACAGAATCTACCTGCAAATGAGCAGCCTGAGAGCTGAGGACACGGCCACCTATTACTGTGCTGGAGA
IGH_HiC_scaffold_2_arrow_ctg1	+	1178397	1178426	CACAGTG	GACACAAAC	IGHV4-30-2*01	+	79.2642	30	1178101	CAGATGCAGCTTCAGGAGTCGGGACCTGGCCTGGTGAAGCCCTCGCAGTCCCTGTCCCTCACCTGTGCTGTGTGTGGTTACTCCATCACTAGTGGTTACTGCTGGAGCTGGATCCATCTGCCCCCAGGGAAGGGGCTGGAGTGGATAGGGTGCATATGTTATGATAGTAGCACTAACTACAGCCCATCCCTCAAGAGCCGAGTGTCCATCTCTAGAGACTCATCCAAGAACCAGTTCTCCCTGCAGCTGATCTTCCTAACCACCCAGGACACGGCTACCTATTACTGTGTCAGAGA
IGH_HiC_scaffold_2_arrow_ctg1	-	1568735	1568704	CACAGTG	CACTAACCT	IGHV4-28*01	+	79.7945	28	1568742	CAGGTGCAACTGCAGGAGTCAGGACCTGGCCTGGTGAAGCCCTCAGAGACCCTGTCCCTCACGTGTACTGTGTCTGGATTCTCCATTACAACCAGTGGTTACTGCTGGCACTGGATGCGTGAGCCCCCAGGGAAGGGGCTGGAGTGGATAGGGTACATATGTAGTGGTGGTAGCACTTACTACAGCCCATCCCTCAAGAGCCGAGCATCCATCTCCAGAGACACGTCCAAGAACCAGTTCTCCCTGCACTTGAGCCCCCTGACCACCCAGGACACGGCCACCTGTTACTGTG
IGH_HiC_scaffold_2_arrow_ctg1	-	1304554	1304524	CACAGTG	CATAAAACT	IGHV4-30-2*01	-	73.8255	22	1304561	AGGACCACATCTTTCACTGTGAGTCCAGCACAGTAATGCACAGCCACACCCTTATTGGTCACATAACTCCACTGTAGGAGAACTGATTCTTGCATGTGTCTCTAGACATGGTGACTTGACTCTTCATGGAGGGGTAGTAAGTTGTGCCTCCATTATGAAGAGCGTGCCCCATTCACTGCAGCACCTTTCCCAGATGCTGATGGATCCAGCTCCAGCTGAAACCAATGGTGATGGAGTAACCAGAGACAGCACAGGTGAGGAACAGGTCTGTGAGGTCTTCACCACCCTGGTCCTGAATACTGCAGCTGCACCTGTGATAGGAGCCTGGGGAC
IGH_HiC_scaffold_2_arrow_ctg1	-	1563759	1563730	CACAGTG	GACACAAAC	IGHV3-23*01	+	89.6194	47	1563766	GACGTGAATCTGGTGGAGTCTGGGGGAGGCCTGGTGCAGCCTGGGGGGTCCCTGCGACTCTCCTGTGCAGCCTCTGGATTCACCTTCAGTAGCTACGACATGAGCTGGGTCCGCCAGGCTCCAGGGAAGGGGCTGGAGTGGGTTGGGTATATTAGCAATGGTGGTAGCACCTACTACCCAGACTCTGTGAAGGGCCGGTTCACCATCTCCAGAGACAACTCCAAGAACACGCTGTACCTGCAAATGAGCAGCCTGAGAGCTGAGGACACAGCCACCTATTACTGTG
IGH_HiC_scaffold_2_arrow_ctg1	-	1556594	1556564	CACAGTG	CACAAACCT	IGHV3-23*01	+	89.9654	49	1556601	GACGTGCAGCTGGTGGAGTCTGGGGGAGGCCTGGTGCAGCCCGGGGGGTCCCTGCGACTCTCCTGTGCAGCCTCTGGATTCACCTTCAGTAGCTACTACATGAGCTGGGTCCGCCAGGCTCCAGGGAAGGGGCTGGAGTGGGTTGGGTATATTAGCAGTAGTGGTGGTAGCACCAACTACCTAGACTCTGTGAAGGGCCGGTTCACCATCTCCAGAGACAACTCCAAGAACACGCTGTACCTGCAAATGAGCAGCCTGAGAGCCGAGGACACGGCCACCTATTACTGTG
IGH_HiC_scaffold_2_arrow_ctg1	-	1547126	1547097	CACAGTG	GACACAAAC	IGHV3-23*01	+	88.2759	48	1547133	GACGTGCAGCTGGTGGAGTCTGGGGGAGGCCTGGTGCAGCCTGGGGGGTCCCTGCGACTCTCCTGTGCAGCCTCTGGATTCACCTTCAGTGACTACTGGATGAGCTGGGTCCGCCAGGCTCCAGGGAAGGGGCTGGAGTGGGTCTCAAACATTGAGTATGATAGTGATCGTAAAAACTACGCCAACTCCGTGATGGGCCGGTTCACCATCTCCAGAGACAACTCCAAGAACACGCTGTACCTGCAAATGAACAGCCTGAGAGCCGAGGACACGGCCACCTATTACTGTG
IGH_HiC_scaffold_2_arrow_ctg1	-	1543649	1543620	CACAGTG	GACACAAAC	IGHV3-69-1*01	+	87.4126	42	1543656	GACGTGCAGCTGGTGGAGTCTGGGGGAGGCCTGGTGCAGCCTGGGGGGTCCCTGCGACTCTCCTGTGCAGCCTCTGGATTCACCTTCAGTGACTACTGGATGAGATGGTTCCGCCAGGCTCCAGGGAATGGGCTGGAGTGGATCCCACGCATTAGTGGTAGTGCTACCATTAACTATGCGGACTCAGTTAAGGGCCGATTCACCATCTCCAGATACGACTCCAAGAACACGCTGTACCTGCAAATGAGCAGCCTGAGAGCCGAGGACACAGCCACCTATTACTGTG
IGH_HiC_scaffold_2_arrow_ctg1	-	1539122	1539092	CACAGTG	CACAAACCT	IGHV4-38-2*01	+	67.8082	23	1539129	CAGGTGCAGCTGCAGGAGTCGGGACCTGGCCTGGTGACGCCCTCATCAAGCCTGTCCTTCAGCTGTGTAGATCCATCACCAGTGTTTACTATCGGAGCTAAATCTGTCACCCTTGGGGAGGGTGCTGCAGGGGATGGGCACTTTGATACTAATGGAGGTCTAACTCGTAACCCTTGCTGCAGAGTTGAGTCACCACCTCCAGAGACACGTCAACAGCCAGTTCTCCCCACAGCTGGGCTGTGACCCGTGAGAAGGTGATGTGCAGGTCTATG
IGH_HiC_scaffold_2_arrow_ctg1	-	1138963	1138933	CACAGTG	CACAAACCT	IGHV3-11*01	+	85.1211	35	1138970	ACGTGCAGCTGGTGGAGTCTGGGGGATGCCTGGTGCAGCCTGGGGGGTCCCTGCGACTCTCCTGTGCATCCTCTGGATTCACCTTCAGTGACTATTACATGAGCTGGGTCCGCCAGGCTCCAGGGAAGGGACTGGAGTGGGTTGGAGAAATTAACCAGGATGGTGGCAGGACAACCTATGCCAACTTCGTGAAGGGCCGATTCACCATCTCCAGAGACAACCCCAAGAACACGCTGTACCTGCAAATGAGCAGCCTGAGAACCGAGGACATGGCCACCTATTACTGTG
IGH_HiC_scaffold_2_arrow_ctg1	-	1114161	1114131	CACAGTG	CATAAAACT	IGHV4-30-2*01	-	74.4108	22	1114168	CACTGACATCCCTCACTGTGAGTCCAGCACAGTAATGCACAGCCACACCCTTATTGGTCACAGAACTCCACTGTAGGAGAACTGATTCTTGCATGTGTCTCTAGATATGGTGACTTCACTCTTCATGGAGGGGTAGTAAGTTGTGCCTCCATTATGAAGAGTGTGCCCCATTCACTGCAGCACCTTTCCCGGATGCTGATGGATCCAGCTCCAGCTGAAACCAATGGTGATGGAGTAACCAGAGACAGCACAGGTGAGGAATAGGTCTGTGAGGTCTTCACCACCCTGGTCCTGAATACTGCAGCTGCACCTCTGATAGGAGCCTGGGGAC
IGH_HiC_scaffold_2_arrow_ctg1	-	824892	824862	CACAGTG	CACAAAACT	IGHV4-30-2*01	-	74.0741	22	824899	GGATCACACTGACATCCCTCACTGTGAGTCCAGCACAGTAATACACAGTCACATCCTCATTGGTCACAGAACTCCACTGCAGAGGAACTGATTCTTGTATGTGTCTCTAGACATGGTGACTTGACCATTCAGGGAGGGGTAGTAAGCTGTGCCCCATTACTAAGAATGTGCCCCATTCACTGCAGCCCCTTTCCTGCAGGCTGATGGATCCAGTTCCAGGTGTAACCAATAGTGATGGAGTAACCAGAGACAGCACAGGTGAGGAACAGGTCTGTGAGGTCTCTACCACCCTGGTCCTGCATACTGCAGCTGCACCTGAGACAGGAGACTGGGG
IGH_HiC_scaffold_2_arrow_ctg1	-	1608294	1608265	CACAGTG	GACACAAAC	IGHV3-23*01	+	86.8512	50	1608301	GATGTGCAGCTGGTGGAGTCTGGGAGAGGCCTGGTGCAGCCTGGGGGTCCCTGCGACCCTCCTGTGCAGCCTCTGGATTCACCTTCAGTAGCTCCTACATGGACTGGGTCCGCCAGGCTCCAGGGAAGGGGCTGGAGTGGGTTGCAACAATTAACAAGGATGGTGGTAGCACCTACTACCCAGACTCTGTGAAGGGCGGGTTCACCATCTCCAGAGACAACTCCAAGAACACACTGTACCTGCAAATGAGCAGCCTGAGAGCCAAGGACATGGCCATCTATTACTGTG
IGH_HiC_scaffold_2_arrow_ctg1	-	1604482	1604453	CACAGTG	GACACAAAC	IGHV4-28*01	+	82.699	27	1604489	CAGGTGCAGCTGCAGGAGTCAGGACCTGGCCTGGTGAAGCCCTCGCAGTCCCTGTCCCTCACCTGTGCTGTGTCTGGTTACTCCATCTCTAGTGGTTACTGCTGGAGCTGGATCCGTCAGCCCCCAGGAAAGGGGCTGGAGTGGATAGGGCACATATGTTATGTTGGTAGCACTTACTACAGCCCATCCCTCAAGAGCCGAGCGTCCATCTCCAGAGACACGTCCAATACCAGTTCTCCCTGCAGCTGAGCTCCCTGACCACCCAGGACACGGCCACCTATTACTGTG

[truncated: 11 more sheets: European_otter_mLutLut1, greater_horseshoe_bat_mRhiFer1, grey_squirrel_mSciCar1, Kuhls_pipistrelle_mPipKuh1, pale_spear-nosed_bat_mPhyDis1, Pallass_mastiff_bat_mMolMol1, platypus_mOrnAna1, ring-tailed_lemur_mLemCat1, southern_two-toed_sloth_mChoDid, stoat_mMusErm1, vaquita_mPhoSin1]
