# Supplementary material for: Gene prediction in the immunoglobulin loci
Source: HighWire-hosted journal article supplement (doi:10.1101/gr.276676.122), 2022-05-11
Supplement: Supplemental_Table_S20.xlsx [file Supplemental_Table_S20.xlsx]

## Sheet: caption
Supplemental Table S20. A list of IGHD genes detected by IgDetective in the iterative mode.

## Sheet: chimp
contig	reference strand	left heptamer index	left nonamer index	left heptamer	left nonamer	right heptamer index	right nonamer index	right heptamer	right nonamer	start of gene	gene sequence
IGH_NC_036882.1	+	130817568	130817548	CATTGTG	GCATTTTGT	130817657	130817675	CACAGCA	CCAAAAATG	130817569	ATTGTGGCAGCAAGCAGTTAGTTAATCAACCTAAGTGCCAATAATGGAGTTTTACTACAGTGACAAGTGGCCAGAAAAGGTCCAACTG
IGH_NC_036893.1	+	63457561	63457540	CACTGTG	GGTTTTTGT	63457711	63457731	CACGGTG	ACTAAAAAC	63457562	ACTGTGATATTTTTTATTTGTGGGAGGAAGGAAAAAATATACGTAAAAGAGACAGGCCGGGCGCGGTGGCTCACGCCTGTAATCCCAGCACTTTGGGAGGCCGAGCTGGGCAGATCGTGAGGTTAGGAGATCGAGACCATCCTGGCTAA
IGH_NC_036893.1	+	3373718	3373697	CACTGTG	AGTTTTTGT	3373738	3373756	CACAGTG	ACAGAGACC	3373719	ACTGTGACTGGGGGATACG
IGH_NC_036894.1	+	8826616	8826595	CACTGTG	GGATTTTGT	8826654	8826673	CACAGTG	TCCCAAAGC	8826617	ACTGTGAGAATATTGTAGTAGTGCTACTTTCTATGCC
IGH_NC_036894.1	+	42959376	42959354	CACTATG	GTTTTTTGT	42959449	42959468	CAAAGTG	GCATAAAGC	42959377	ACTATGTTGCCCAGGCTGCCCAGTCTAGTCTCAAACTCTTGGGCTCAAATGATCTTCCCACCTCGGCAATCC
IGH_NC_036902.1	+	41350910	41350889	CACTATG	GTTTTTTGT	41351016	41351034	AACAGTG	CCAAAATAC	41350911	ACTATGTTTCCCAGGCTGGTCTCGACCTCCTGGGCTCAAGTGATCCTCCCGCTTCAGCCTCCCAAAGTGCTGGGATTACAGGCATATGCCACAGTGTCTGGCCCT
IGH_NC_036902.1	+	86971224	86971202	CACGGTG	GGTTTTTAA	86971312	86971332	CACGGTG	ACTAAAAAC	86971225	ACGGTGGCTCATGCCTGTAATCCCAGCACTTTGGCAGGCCAAGGCGGGTGGATCACGAGGTCAGGAGATCGAGGCCATCCTGGCTAA
IGH_NC_036888.1	-	11972499	11972518	TAGTGTG	GCTTTCTGA	11972487	11972466	CACAATG	CCAAACAGC	11972506	GTATA
IGH_NC_036894.1	-	8829135	8829154	CACTGTG	GGTTTTTGA	8829097	8829076	CACAGTG	CCCCAAACC	8829142	GGGTATAATAACCAGTCCAAAAATCATAATA
IGH_NC_036894.1	-	50428752	50428772	CACTATG	GTTTTTTGT	50428689	50428668	CAAAGTG	TCAGGAACT	50428759	GTTGCCCAGACTGGTCTCAAACTCTTAGGCTCAAGCAGTCCTCCCACCTTGACCTC
IGH_NC_036902.1	-	128210871	128210891	CACTATG	GCTTTTTGT	128210717	128210697	CACTGTA	TCAGAAACT	128210878	GCTGCCCAGGTTGGACTTGAACTCCTGGCCTCAAGCAATCTTCCTGCCTCTTTCCATGTTCTAATGCAGTGGTTTAAAAAGTATGCTCCTTAAACTAGCAGCACCAGGAGCATGGGGGTAGTCATTTGAAATGCAAAATCTTGGGTT
IGH_NC_036882.1	+	130817568	130817548	CATTGTG	GCATTTTGT	130817657	130817675	CACAGCA	CCAAAAATG	130817569	GCAGCAAGCAGTTAGTTAATCAACCTAAGTGCCAATAATGGAGTTTTACTACAGTGACAAGTGGCCAGAAAAGGTCCAACTG
IGH_NC_036893.1	+	63457561	63457540	CACTGTG	GGTTTTTGT	63457711	63457731	CACGGTG	ACTAAAAAC	63457562	ATATTTTTTATTTGTGGGAGGAAGGAAAAAATATACGTAAAAGAGACAGGCCGGGCGCGGTGGCTCACGCCTGTAATCCCAGCACTTTGGGAGGCCGAGCTGGGCAGATCGTGAGGTTAGGAGATCGAGACCATCCTGGCTAA
IGH_NC_036893.1	+	3373718	3373697	CACTGTG	AGTTTTTGT	3373738	3373756	CACAGTG	ACAGAGACC	3373719	ACTGGGGGATACG
IGH_NC_036894.1	+	8826616	8826595	CACTGTG	GGATTTTGT	8826654	8826673	CACAGTG	TCCCAAAGC	8826617	AGAATATTGTAGTAGTGCTACTTTCTATGCC
IGH_NC_036894.1	+	42959376	42959354	CACTATG	GTTTTTTGT	42959449	42959468	CAAAGTG	GCATAAAGC	42959377	TTGCCCAGGCTGCCCAGTCTAGTCTCAAACTCTTGGGCTCAAATGATCTTCCCACCTCGGCAATCC
IGH_NC_036902.1	+	41350910	41350889	CACTATG	GTTTTTTGT	41351016	41351034	AACAGTG	CCAAAATAC	41350911	TTTCCCAGGCTGGTCTCGACCTCCTGGGCTCAAGTGATCCTCCCGCTTCAGCCTCCCAAAGTGCTGGGATTACAGGCATATGCCACAGTGTCTGGCCCT
IGH_NC_036902.1	+	86971224	86971202	CACGGTG	GGTTTTTAA	86971312	86971332	CACGGTG	ACTAAAAAC	86971225	GCTCATGCCTGTAATCCCAGCACTTTGGCAGGCCAAGGCGGGTGGATCACGAGGTCAGGAGATCGAGGCCATCCTGGCTAA
IGH_NC_036888.1	-	11972499	11972518	TAGTGTG	GCTTTCTGA	11972487	11972466	CACAATG	CCAAACAGC	11972506	GTATA
IGH_NC_036894.1	-	8829135	8829154	CACTGTG	GGTTTTTGA	8829097	8829076	CACAGTG	CCCCAAACC	8829142	GGGTATAATAACCAGTCCAAAAATCATAATA
IGH_NC_036894.1	-	50428752	50428772	CACTATG	GTTTTTTGT	50428689	50428668	CAAAGTG	TCAGGAACT	50428759	GTTGCCCAGACTGGTCTCAAACTCTTAGGCTCAAGCAGTCCTCCCACCTTGACCTC
IGH_NC_036902.1	-	128210871	128210891	CACTATG	GCTTTTTGT	128210717	128210697	CACTGTA	TCAGAAACT	128210878	GCTGCCCAGGTTGGACTTGAACTCCTGGCCTCAAGCAATCTTCCTGCCTCTTTCCATGTTCTAATGCAGTGGTTTAAAAAGTATGCTCCTTAAACTAGCAGCACCAGGAGCATGGGGGTAGTCATTTGAAATGCAAAATCTTGGGTT

## Sheet: gorilla
contig	reference strand	left heptamer index	left nonamer index	left heptamer	left nonamer	right heptamer index	right nonamer index	right heptamer	right nonamer	start of gene	gene sequence
IGH_NC_044611.1	+	27399828	27399807	TAGTGTG	GCTTTCTGA	27399842	27399861	CACAATG	CCAAACAGC	27399829	AGTGTGTATATAT
IGH_NC_044616.1	+	86585171	86585150	CACTGTG	GGTTTTTGC	86585189	86585208	CACAGTG	GCCAAAACC	86585172	ACTGTGTCCCCAGTTAG
IGH_NC_044616.1	+	86601580	86601559	CATTGTG	GGTTTCTGT	86601605	86601624	CACTGTG	TCAGAAACC	86601581	ATTGTGGTAGCCGCTGCTATACCC
IGH_NC_044616.1	+	86643889	86643868	CACTGTG	GGTTTTTGA	86643927	86643946	CACAGTG	CCCCAAACC	86643890	ACTGTGGGTATAATAACCAGTCCAATAATTATAATAC
IGH_NC_044622.1	+	27364386	27364365	CACTGTG	GGATTTTGT	27364424	27364443	CACAGTG	TCCCAAAGC	27364387	ACTGTGAGAATATTGTAGTAGTACTACTTTCTGTGCC
IGH_NW_022150755.1	+	44255	44234	CACTGTG	GGTTTTTGA	44293	44312	CACAGTG	CCCCAAACC	44256	ACTGTGGGTATAATAACCAGTCCAAAAATCATAATAC
IGH_NC_044602.1	-	170744560	170744580	CACTATG	GTTTTTTGT	170744497	170744476	CAAAGTG	GCTCAAACC	170744567	GTTGCTCAGGCTGGTCTTGAACTTCTGGGATCAAGTGATTCTCCCACCTTGGCTTC
IGH_NC_044616.1	-	22765376	22765395	CACTGTG	AGTTTTTGT	22765356	22765336	CACAGTG	ACAGAGACC	22765383	GACTGGGGGATAC
IGH_NC_044616.1	-	86646387	86646406	CACTGTG	GGATTTTGT	86646349	86646328	CACAGTG	TCCCAAAGC	86646394	GAGGATATTGTAGTAGTACTAGCTGCTACGC
IGH_NC_044616.1	-	86642780	86642799	TACTGTG	GCTTTTTGT	86642757	86642736	CACAGTG	GCAGAAACT	86642787	GTGACTACGGTAACTA
IGH_NC_044616.1	-	86618049	86618068	CACTGTG	GGATTTTGT	86618011	86617990	CACAGTG	TCCCAAAGC	86618056	GAGGATATTGTAGTGGTGGTAGCTGCTACTC
IGH_NC_044616.1	-	86614616	86614635	TACTGTG	GCTTTTTGT	86614593	86614572	CACAGTG	GCAAAAACT	86614623	GTGACTACGGTAACTA
IGH_NC_044616.1	-	86611787	86611806	CACAGTG	GGTTTCTGA	86611759	86611738	CACAGTG	CCAGAAACC	86611794	GGGGTATAGCAGTGGCTGGTC
IGH_NC_044616.1	-	86608549	86608568	CACTGTG	GGATTTTGT	86608514	86608493	CACAGTG	TCCCAAAGC	86608556	GAGCATATTGTAGTGGTGACTGCTACGC
IGH_NC_044616.1	-	86601606	86601625	CACAGTG	GGTTTCTGA	86601581	86601560	CACAATG	ACAGAAACC	86601613	GGGGTATAGCAGCGGCTA
IGH_NC_044622.1	-	27366920	27366939	CACTGTG	GGTTTTTGA	27366882	27366861	CACAGTG	CCCCAAACC	27366927	GGGTATAATAACCAGTCCAAAAATCATAATA
IGH_NW_022150755.1	-	46792	46811	CACTGTG	GGATTTTGT	46754	46733	CACAGTG	TCCCAAAGC	46799	GAGAATATTGTAGTAGTACTACTTTCTGTGC
IGH_NC_044611.1	+	27399828	27399807	TAGTGTG	GCTTTCTGA	27399842	27399861	CACAATG	CCAAACAGC	27399829	TATATAT
IGH_NC_044616.1	+	86585171	86585150	CACTGTG	GGTTTTTGC	86585189	86585208	CACAGTG	GCCAAAACC	86585172	TCCCCAGTTAG
IGH_NC_044616.1	+	86601580	86601559	CATTGTG	GGTTTCTGT	86601605	86601624	CACTGTG	TCAGAAACC	86601581	GTAGCCGCTGCTATACCC
IGH_NC_044616.1	+	86643889	86643868	CACTGTG	GGTTTTTGA	86643927	86643946	CACAGTG	CCCCAAACC	86643890	GGTATAATAACCAGTCCAATAATTATAATAC
IGH_NC_044622.1	+	27364386	27364365	CACTGTG	GGATTTTGT	27364424	27364443	CACAGTG	TCCCAAAGC	27364387	AGAATATTGTAGTAGTACTACTTTCTGTGCC
IGH_NW_022150755.1	+	44255	44234	CACTGTG	GGTTTTTGA	44293	44312	CACAGTG	CCCCAAACC	44256	GGTATAATAACCAGTCCAAAAATCATAATAC
IGH_NC_044602.1	-	170744560	170744580	CACTATG	GTTTTTTGT	170744497	170744476	CAAAGTG	GCTCAAACC	170744567	GTTGCTCAGGCTGGTCTTGAACTTCTGGGATCAAGTGATTCTCCCACCTTGGCTTC
IGH_NC_044616.1	-	22765376	22765395	CACTGTG	AGTTTTTGT	22765356	22765336	CACAGTG	ACAGAGACC	22765383	GACTGGGGGATAC
IGH_NC_044616.1	-	86646387	86646406	CACTGTG	GGATTTTGT	86646349	86646328	CACAGTG	TCCCAAAGC	86646394	GAGGATATTGTAGTAGTACTAGCTGCTACGC
IGH_NC_044616.1	-	86642780	86642799	TACTGTG	GCTTTTTGT	86642757	86642736	CACAGTG	GCAGAAACT	86642787	GTGACTACGGTAACTA
IGH_NC_044616.1	-	86618049	86618068	CACTGTG	GGATTTTGT	86618011	86617990	CACAGTG	TCCCAAAGC	86618056	GAGGATATTGTAGTGGTGGTAGCTGCTACTC
IGH_NC_044616.1	-	86614616	86614635	TACTGTG	GCTTTTTGT	86614593	86614572	CACAGTG	GCAAAAACT	86614623	GTGACTACGGTAACTA
IGH_NC_044616.1	-	86611787	86611806	CACAGTG	GGTTTCTGA	86611759	86611738	CACAGTG	CCAGAAACC	86611794	GGGGTATAGCAGTGGCTGGTC
IGH_NC_044616.1	-	86608549	86608568	CACTGTG	GGATTTTGT	86608514	86608493	CACAGTG	TCCCAAAGC	86608556	GAGCATATTGTAGTGGTGACTGCTACGC
IGH_NC_044616.1	-	86601606	86601625	CACAGTG	GGTTTCTGA	86601581	86601560	CACAATG	ACAGAAACC	86601613	GGGGTATAGCAGCGGCTA
IGH_NC_044622.1	-	27366920	27366939	CACTGTG	GGTTTTTGA	27366882	27366861	CACAGTG	CCCCAAACC	27366927	GGGTATAATAACCAGTCCAAAAATCATAATA
IGH_NW_022150755.1	-	46792	46811	CACTGTG	GGATTTTGT	46754	46733	CACAGTG	TCCCAAAGC	46799	GAGAATATTGTAGTAGTACTACTTTCTGTGC

## Sheet: orangutan
contig	reference strand	left heptamer index	left nonamer index	left heptamer	left nonamer	right heptamer index	right nonamer index	right heptamer	right nonamer	start of gene	gene sequence
IGH_NC_036917.1	+	87826563	87826542	CATTGTG	GGTTTCTGT	87826588	87826607	CACTGTG	TCGGAAACC	87826564	ATTGTGGTAGCCACTGCTATACCC
IGH_NC_036917.1	+	3163569	3163548	CACTGTG	AGTTTTTGT	3163590	3163608	CACAGTG	ACAGAGACC	3163570	ACTGTGACTGGGGATATACG
IGH_NC_036917.1	+	87849513	87849492	CACTGTG	GGTTTTTGA	87849551	87849570	CACAGTG	CCCCAAACC	87849514	ACTGTGGTTGTAATAGGTACCATCACTATAGTAATAC
IGH_NC_036917.1	+	87859252	87859231	CGCTGTG	GGTTTTTGA	87859290	87859309	CACAGTG	CCCCAAACC	87859253	GCTGTGGTTATAATAACTACCCCAACTATAGTAATAC
IGH_NC_036917.1	+	87868100	87868079	CACTGTG	GGTTTTTGA	87868138	87868157	CACAGTG	CCCCAAACC	87868101	ACTGTGGTTATAATAACCACTACCACTATAGTAATAC
IGH_NC_036917.1	-	87861566	87861585	CACTGTG	GGATTTTGT	87861528	87861507	CACAGTG	TCCCAAAGC	87861573	GAGGATATTGTAGTGGTGGTAACTGCTATAC
IGH_NC_036917.1	-	87854815	87854834	CACAGTG	GGATTCTGA	87854791	87854770	CACTGTG	TCCAAAACT	87854822	GGGTATAACTGGAACTA
IGH_NC_036917.1	-	87852160	87852179	CACTGTG	GGATTTTGT	87852122	87852101	CACAGTG	TCCCAAAGC	87852167	GAGGATATTGTAGTGGTGGTAGCTGCTACGC
IGH_NC_036917.1	-	87848403	87848422	TACTGTG	GCTTTTTGT	87848377	87848356	CACAGTG	GCAAAAACT	87848410	GTGACTACAGTGCTAACTA
IGH_NC_036917.1	-	87845932	87845951	CACAGTG	GGTTTCTGA	87845901	87845880	CACAGTG	CCAGAAACC	87845939	GGGGTATAGCAGCAGCAGCTGGTA
IGH_NC_036917.1	-	87842779	87842798	CACTGTG	GGATTTTGT	87842741	87842720	CACAGTG	TCCCAAAGC	87842786	GAGGATATTGTAGTGGTAGTGGCTGCTACGC
IGH_NC_036917.1	-	87836527	87836546	CACAGTG	GGTTTCTGA	87836499	87836478	CACAGTG	CCAGAAACC	87836534	GGGGTATAGCAGCGGCTGGTC
IGH_NC_036917.1	-	87833363	87833382	CACTGTG	GGATTTTGT	87833325	87833304	CACAGTG	TCCCAAAGC	87833370	GAGGATATTGTAGTGGTGGTAGCTGCTACGC
IGH_NC_036917.1	+	87826563	87826542	CATTGTG	GGTTTCTGT	87826588	87826607	CACTGTG	TCGGAAACC	87826564	GTAGCCACTGCTATACCC
IGH_NC_036917.1	+	3163569	3163548	CACTGTG	AGTTTTTGT	3163590	3163608	CACAGTG	ACAGAGACC	3163570	ACTGGGGATATACG
IGH_NC_036917.1	+	87849513	87849492	CACTGTG	GGTTTTTGA	87849551	87849570	CACAGTG	CCCCAAACC	87849514	GTTGTAATAGGTACCATCACTATAGTAATAC
IGH_NC_036917.1	+	87859252	87859231	CGCTGTG	GGTTTTTGA	87859290	87859309	CACAGTG	CCCCAAACC	87859253	GTTATAATAACTACCCCAACTATAGTAATAC
IGH_NC_036917.1	+	87868100	87868079	CACTGTG	GGTTTTTGA	87868138	87868157	CACAGTG	CCCCAAACC	87868101	GTTATAATAACCACTACCACTATAGTAATAC
IGH_NC_036917.1	-	87861566	87861585	CACTGTG	GGATTTTGT	87861528	87861507	CACAGTG	TCCCAAAGC	87861573	GAGGATATTGTAGTGGTGGTAACTGCTATAC
IGH_NC_036917.1	-	87854815	87854834	CACAGTG	GGATTCTGA	87854791	87854770	CACTGTG	TCCAAAACT	87854822	GGGTATAACTGGAACTA
IGH_NC_036917.1	-	87852160	87852179	CACTGTG	GGATTTTGT	87852122	87852101	CACAGTG	TCCCAAAGC	87852167	GAGGATATTGTAGTGGTGGTAGCTGCTACGC
IGH_NC_036917.1	-	87848403	87848422	TACTGTG	GCTTTTTGT	87848377	87848356	CACAGTG	GCAAAAACT	87848410	GTGACTACAGTGCTAACTA
IGH_NC_036917.1	-	87845932	87845951	CACAGTG	GGTTTCTGA	87845901	87845880	CACAGTG	CCAGAAACC	87845939	GGGGTATAGCAGCAGCAGCTGGTA
IGH_NC_036917.1	-	87842779	87842798	CACTGTG	GGATTTTGT	87842741	87842720	CACAGTG	TCCCAAAGC	87842786	GAGGATATTGTAGTGGTAGTGGCTGCTACGC
IGH_NC_036917.1	-	87836527	87836546	CACAGTG	GGTTTCTGA	87836499	87836478	CACAGTG	CCAGAAACC	87836534	GGGGTATAGCAGCGGCTGGTC
IGH_NC_036917.1	-	87833363	87833382	CACTGTG	GGATTTTGT	87833325	87833304	CACAGTG	TCCCAAAGC	87833370	GAGGATATTGTAGTGGTGGTAGCTGCTACGC

## Sheet: blue_whale_mBalMus1
contig	reference strand	left heptamer index	left nonamer index	left heptamer	left nonamer	right heptamer index	right nonamer index	right heptamer	right nonamer	start of gene	gene sequence
IGH_Super_scaffold_11	+	101074555	101074534	CATTGTG	GGTTTTTAT	101074573	101074591	CACAGTG	ACAGAGACC	101074556	ATTGTGCGTGGGACACA
IGH_Super_scaffold_17	+	29015	28994	CACTGTG	GGTTTTTGC	29038	29057	CACAGTA	GCAAAAAGC	29016	ACTGTGGTATCCACCGTAGTAT
IGH_Super_scaffold_11	+	101074555	101074534	CATTGTG	GGTTTTTAT	101074573	101074591	CACAGTG	ACAGAGACC	101074556	CGTGGGACACA
IGH_Super_scaffold_17	+	29015	28994	CACTGTG	GGTTTTTGC	29038	29057	CACAGTA	GCAAAAAGC	29016	GTATCCACCGTAGTAT

## Sheet: bottlenose_dolphin_mTurTru1_mat
contig	reference strand	left heptamer index	left nonamer index	left heptamer	left nonamer	right heptamer index	right nonamer index	right heptamer	right nonamer	start of gene	gene sequence
IGH_mat_scaffold_11_arrow	-	521238	521257	CGCTGTG	GGTTTTTGC	521215	521194	CACAGTA	GCAAAAAGC	521245	GGTATCCGTCATAGTA
IGH_mat_scaffold_11_arrow	-	75088651	75088670	CATTGTG	GGTTTTTAT	75088633	75088613	CACAGTG	ACAGAGACC	75088658	GGGTGGGATAC
IGH_mat_scaffold_11_arrow	-	521238	521257	CGCTGTG	GGTTTTTGC	521215	521194	CACAGTA	GCAAAAAGC	521245	GGTATCCGTCATAGTA
IGH_mat_scaffold_11_arrow	-	75088651	75088670	CATTGTG	GGTTTTTAT	75088633	75088613	CACAGTG	ACAGAGACC	75088658	GGGTGGGATAC

## Sheet: Californian_sea_lion_mZalCal1
contig	reference strand	left heptamer index	left nonamer index	left heptamer	left nonamer	right heptamer index	right nonamer index	right heptamer	right nonamer	start of gene	gene sequence
IGH_S6	+	338199	338178	CACTGTG	GCTTTTTGA	338224	338243	CACAGTG	ACAAAAACC	338200	ACTGTGGAACTACGTAGGCTACAC
IGH_S6	+	342409	342388	CACTGTG	GCTTTTTGA	342435	342454	CAAAGTG	ACAAAAACC	342410	ACTGTGTAATGCAGACAGCTACCAC
IGH_S6	+	356196	356175	CACTGTG	GCTTTTTGA	356222	356241	CACAGTG	GCAAAAACC	356197	ACTGTGTAACTACATAACCTACAAC
IGH_S6	+	372940	372919	CACTGTG	GCTTTTTGA	372965	372983	CACAGTG	GCAAAAACC	372941	ACTGTGGAACTACATAGACTACAC
IGH_S6	-	372966	372984	CACTGTG	GGTTTTTGC	372941	372920	CACAGTG	TCAAAAAGC	372973	GGTGTAGTCTATGTAGTT
IGH_S6	-	356223	356242	CACTGTG	GGTTTTTGC	356197	356176	CACAGTG	TCAAAAAGC	356230	GGTTGTAGGTTATGTAGTT
IGH_S6	-	338225	338244	CACTGTG	GGTTTTTGT	338200	338179	CACAGTG	TCAAAAAGC	338232	GGTGTAGCCTACGTAGTT
IGH_S6	+	338199	338178	CACTGTG	GCTTTTTGA	338224	338243	CACAGTG	ACAAAAACC	338200	GAACTACGTAGGCTACAC
IGH_S6	+	342409	342388	CACTGTG	GCTTTTTGA	342435	342454	CAAAGTG	ACAAAAACC	342410	TAATGCAGACAGCTACCAC
IGH_S6	+	356196	356175	CACTGTG	GCTTTTTGA	356222	356241	CACAGTG	GCAAAAACC	356197	TAACTACATAACCTACAAC
IGH_S6	+	372940	372919	CACTGTG	GCTTTTTGA	372965	372983	CACAGTG	GCAAAAACC	372941	GAACTACATAGACTACAC
IGH_S6	-	372966	372984	CACTGTG	GGTTTTTGC	372941	372920	CACAGTG	TCAAAAAGC	372973	GGTGTAGTCTATGTAGTT
IGH_S6	-	356223	356242	CACTGTG	GGTTTTTGC	356197	356176	CACAGTG	TCAAAAAGC	356230	GGTTGTAGGTTATGTAGTT
IGH_S6	-	338225	338244	CACTGTG	GGTTTTTGT	338200	338179	CACAGTG	TCAAAAAGC	338232	GGTGTAGCCTACGTAGTT

## Sheet: Canadian_lynx_mLynCan4
contig	reference strand	left heptamer index	left nonamer index	left heptamer	left nonamer	right heptamer index	right nonamer index	right heptamer	right nonamer	start of gene	gene sequence
IGH_Super_Scaffold_2	+	73039640	73039619	CACTGTG	GGTTTTTGT	73039661	73039679	CACAGTG	ACAGAGACC	73039641	ACTGTGATTGGTGGGATACT
IGH_Super_Scaffold_2	+	146008004	146007983	CACCGTG	GGTTTTTGC	146008033	146008052	CACAGTA	TCAAAAAGC	146008005	ACCGTGGGCATAGTCACTATCGTAGTAA
IGH_Super_Scaffold_2	+	146012741	146012720	CACCGTG	GGTTTTTGC	146012770	146012789	CACAGTA	TCAAAAAGC	146012742	ACCGTGGGCGTAGTAGCTACCGTAGTAA
IGH_Super_Scaffold_2	-	146012771	146012790	TACTGTG	GCTTTTTGA	146012742	146012721	CACGGTG	GCAAAAACC	146012778	GTTACTACGGTAGCTACTACGC
IGH_Super_Scaffold_2	-	146008034	146008053	TACTGTG	GCTTTTTGA	146008005	146007984	CACGGTG	GCAAAAACC	146008041	GTTACTACGATAGTGACTATGC
IGH_Super_Scaffold_2	+	73039640	73039619	CACTGTG	GGTTTTTGT	73039661	73039679	CACAGTG	ACAGAGACC	73039641	ATTGGTGGGATACT
IGH_Super_Scaffold_2	+	146008004	146007983	CACCGTG	GGTTTTTGC	146008033	146008052	CACAGTA	TCAAAAAGC	146008005	GGCATAGTCACTATCGTAGTAA
IGH_Super_Scaffold_2	+	146012741	146012720	CACCGTG	GGTTTTTGC	146012770	146012789	CACAGTA	TCAAAAAGC	146012742	GGCGTAGTAGCTACCGTAGTAA
IGH_Super_Scaffold_2	-	146012771	146012790	TACTGTG	GCTTTTTGA	146012742	146012721	CACGGTG	GCAAAAACC	146012778	GTTACTACGGTAGCTACTACGC
IGH_Super_Scaffold_2	-	146008034	146008053	TACTGTG	GCTTTTTGA	146008005	146007984	CACGGTG	GCAAAAACC	146008041	GTTACTACGATAGTGACTATGC

## Sheet: common_marmoset_mCalJac1_matern
contig	reference strand	left heptamer index	left nonamer index	left heptamer	left nonamer	right heptamer index	right nonamer index	right heptamer	right nonamer	start of gene	gene sequence
IGH_Super_scaffold_mat_10	+	75956232	75956210	CACTATG	GTTTTTTGT	75956293	75956312	CAAAGTG	ACAGAAGCC	75956233	ACTATGCTGTCCAGGGTGGTCTCAGACTCCCACCATGGGATCCTCCCACCTTGTCCTCCC
IGH_Super_scaffold_mat_10	+	16490711	16490691	TACTGGG	GGTTTGTGA	16490804	16490823	CACAGCA	GCCTAAACC	16490712	ACTGGGGCCTGTCAAGGGCTCCAAACAGCATCCTTATCAGCCACTGATATTTCATCCACCATTGGATTTACTGGATCATAGGGCCTACATGG
IGH_Super_scaffold_mat_12	+	52490580	52490559	CACTGTG	AGTTTTTGT	52490601	52490619	CACAGTG	ACAGAGACC	52490581	ACTGTGATTGGGGGGATACG
IGH_Super_scaffold_mat_12	+	136198626	136198605	CACTGTG	GGTTCTTGT	136198644	136198663	CACAGTG	GCTGAAACC	136198627	ACTGTGCCCCCAGTTAG
IGH_Super_scaffold_mat_12	+	136235920	136235899	CACTGTG	GGTTTCTGT	136235945	136235964	CACGGTG	TCAGAAACC	136235921	ACTGTGGTATCCGCTAGTATACCC
IGH_Super_scaffold_mat_12	-	136243230	136243249	CACGGTG	GGATTCTGA	136243206	136243185	CACTGTG	TCTAAAACT	136243237	GGGTACCCTGGGAACTA
IGH_Super_scaffold_mat_12	-	136239172	136239191	TACTGTG	GGTTTTTGT	136239140	136239119	CACAGTG	GAAAAAACC	136239179	GTAACTACGGTAACTACGGTACCTA
IGH_Super_scaffold_mat_12	-	136235946	136235965	CACCGTG	GGTTTCTGA	136235921	136235900	CACAGTG	ACAGAAACC	136235953	GGGGTATACTAGCGGATA
IGH_Super_scaffold_mat_12	-	136229950	136229969	TACTGTG	GGTTTTTGT	136229927	136229906	CACAGTG	GAAAAAACC	136229957	GTAACTACGGTAACTA
IGH_Super_scaffold_mat_12	-	136227288	136227307	CAGTGTG	GGTTTCTGA	136227261	136227240	CACAGTG	CCAGAAACC	136227295	GGGGTATATAGCAGCTGGGA
IGH_Super_scaffold_mat_12	-	136218868	136218887	CAGTGTG	GGTTTCTGA	136218841	136218820	CACAGTG	CCAGAAACC	136218875	GGGGTATATAGCGGCTGGGC
IGH_Super_scaffold_mat_10	+	75956232	75956210	CACTATG	GTTTTTTGT	75956293	75956312	CAAAGTG	ACAGAAGCC	75956233	CTGTCCAGGGTGGTCTCAGACTCCCACCATGGGATCCTCCCACCTTGTCCTCCC
IGH_Super_scaffold_mat_10	+	16490711	16490691	TACTGGG	GGTTTGTGA	16490804	16490823	CACAGCA	GCCTAAACC	16490712	GCCTGTCAAGGGCTCCAAACAGCATCCTTATCAGCCACTGATATTTCATCCACCATTGGATTTACTGGATCATAGGGCCTACATGG
IGH_Super_scaffold_mat_12	+	52490580	52490559	CACTGTG	AGTTTTTGT	52490601	52490619	CACAGTG	ACAGAGACC	52490581	ATTGGGGGGATACG
IGH_Super_scaffold_mat_12	+	136198626	136198605	CACTGTG	GGTTCTTGT	136198644	136198663	CACAGTG	GCTGAAACC	136198627	CCCCCAGTTAG
IGH_Super_scaffold_mat_12	+	136235920	136235899	CACTGTG	GGTTTCTGT	136235945	136235964	CACGGTG	TCAGAAACC	136235921	GTATCCGCTAGTATACCC
IGH_Super_scaffold_mat_12	-	136243230	136243249	CACGGTG	GGATTCTGA	136243206	136243185	CACTGTG	TCTAAAACT	136243237	GGGTACCCTGGGAACTA
IGH_Super_scaffold_mat_12	-	136239172	136239191	TACTGTG	GGTTTTTGT	136239140	136239119	CACAGTG	GAAAAAACC	136239179	GTAACTACGGTAACTACGGTACCTA
IGH_Super_scaffold_mat_12	-	136235946	136235965	CACCGTG	GGTTTCTGA	136235921	136235900	CACAGTG	ACAGAAACC	136235953	GGGGTATACTAGCGGATA
IGH_Super_scaffold_mat_12	-	136229950	136229969	TACTGTG	GGTTTTTGT	136229927	136229906	CACAGTG	GAAAAAACC	136229957	GTAACTACGGTAACTA
IGH_Super_scaffold_mat_12	-	136227288	136227307	CAGTGTG	GGTTTCTGA	136227261	136227240	CACAGTG	CCAGAAACC	136227295	GGGGTATATAGCAGCTGGGA
IGH_Super_scaffold_mat_12	-	136218868	136218887	CAGTGTG	GGTTTCTGA	136218841	136218820	CACAGTG	CCAGAAACC	136218875	GGGGTATATAGCGGCTGGGC

## Sheet: Eurasian_red squirrel_mSciVul1
contig	reference strand	left heptamer index	left nonamer index	left heptamer	left nonamer	right heptamer index	right nonamer index	right heptamer	right nonamer	start of gene	gene sequence
IGH_HiC_scaffold_2_arrow_ctg1	-	152818261	152818280	CACAGTG	GGTTTTTGC	152818142	152818121	CACACTG	ACTGAAAGC	152818268	GCAATGGAAGAGACAGACTAGCTTTCAGGTCAGTGCAAGGCCACAGGTCAGTGGTCATAACAGAGGCAGGAGGTCATCTCCTGGAGAGTGTCAAGGCAAGCTTCTCCATATT
IGH_HiC_scaffold_2_arrow_ctg1	-	1680100	1680119	CACTGTG	GGTTTTTGT	1680082	1680061	CACTGTG	GCCAAAACC	1680107	GGTTCCAGTTA
IGH_HiC_scaffold_2_arrow_ctg1	-	78583014	78583033	CACTGTG	GATTTTTGT	78582993	78582973	CACAGTG	ACAGAGACC	78583021	GATTGGGGGGATAT
IGH_HiC_scaffold_2_arrow_ctg1	-	152818261	152818280	CACAGTG	GGTTTTTGC	152818142	152818121	CACACTG	ACTGAAAGC	152818268	GCAATGGAAGAGACAGACTAGCTTTCAGGTCAGTGCAAGGCCACAGGTCAGTGGTCATAACAGAGGCAGGAGGTCATCTCCTGGAGAGTGTCAAGGCAAGCTTCTCCATATT
IGH_HiC_scaffold_2_arrow_ctg1	-	1680100	1680119	CACTGTG	GGTTTTTGT	1680082	1680061	CACTGTG	GCCAAAACC	1680107	GGTTCCAGTTA
IGH_HiC_scaffold_2_arrow_ctg1	-	78583014	78583033	CACTGTG	GATTTTTGT	78582993	78582973	CACAGTG	ACAGAGACC	78583021	GATTGGGGGGATAT

[truncated: 11 more sheets: European_otter_mLutLut1, greater_horseshoe_bat_mRhiFer1, grey_squirrel_mSciCar1, Kuhls_pipistrelle_mPipKuh1, pale_spear-nosed_bat_mPhyDis1, Pallass_mastiff_bat_mMolMol1, platypus_mOrnAna1, ring-tailed_lemur_mLemCat1, southern_two-toed_sloth_mChoDid, stoat_mMusErm1, vaquita_mPhoSin1]
