# Supplementary material for: Gene prediction in the immunoglobulin loci
Source: HighWire-hosted journal article supplement (doi:10.1101/gr.276676.122), 2022-05-11
Supplement: Supplemental_Table_S21.xlsx [file Supplemental_Table_S21.xlsx]

## Sheet: caption
Supplemental Table S21. A list of IGHJ genes detected by IgDetective in the iterative mode.

## Sheet: chimp
contig	reference strand	heptamer index	nonamer index	heptamer	nonamer	best aligned human gene	alignment direction	alignment PI	longest common k-mer	start of gene	gene sequence
IGH_NC_036882.1	+	35785200	35785167	GCCTGTG	GATTTTTTG	IGHJ1*01	-	68.0851	11	35785207	TTTTTCTTTTCTTGTAATATTATTGTCTGGCTTTGGTATCAGAGTAATGC
IGH_NC_036882.1	-	105956865	105956896	AACTGTG	GGGTTCTTG	IGHJ4*01	-	66.6667	11	105956796	AACTGTGAACACAGTGCCTGGCCCCAGAAAGCCCTCACAAAATGCCCCTGCTCTGGCAGTGATGAGCTT
IGH_NC_036888.1	-	101427957	101427990	CACTCTG	AGGTTCTTG	IGHJ1*01	+	65.9574	11	101427899	CACTCTGGTGCCCTGGCTCTGCCTGGCCTCTCCCTCCTATCCTCGGCAGGGACCTGGG
IGH_NC_036893.1	-	86132796	86132829	GAATGTG	GGGTTCCTG	IGHJ1*01	+	63.3333	11	86132733	GAATGTGGGTACCCAGTGCTGGGTAGTACAGGGCATGTCCCGGGGGTCCCACCTGTCTGAGCA
IGH_NW_019936060.1	+	194	162	CATTGTG	GGGTTTTTG	IGHJ6*01	+	98.4127	17	201	ATTACTACTACTACTACTACGTGGACGTCTGGGGCAAAGGGACCACGGTCACCGTCTCCTCAG

## Sheet: gorilla
contig	reference strand	heptamer index	nonamer index	heptamer	nonamer	best aligned human gene	alignment direction	alignment PI	longest common k-mer	start of gene	gene sequence
IGH_NC_044602.1	-	11068683	11068716	CTCTGTG	GTGTTTCTG	IGHJ1*01	+	63.1579	13	11068624	CTCTGTGTTAGCGGCTCAGTGTGCCAGGGCCAGGGCACCTCAAGGTAATCCCTGTCCCC
IGH_NC_044602.1	-	43664444	43664477	CATCGTG	GGGTTTTGG	IGHJ2*01	-	61.0169	11	43664384	CATCGTGTGGACTGGGGCCAGTGGCACGGCTCTTTAACCTGCCTGCAGGACAGAGATCAG
IGH_NC_044605.1	-	104341349	104341380	AACTGTG	GGGTTCTTG	IGHJ3*01	-	66.6667	11	104341280	AACTGTGAACACAGTGCCTGGCCCCAGAAAGCACTCACAAAATGCCCCTGCTCTGGCAGTGATGAGCTT
IGH_NC_044602.1	+	187167952	187167920	AAATGTG	CTGTTTTTG	IGHJ3*01	+	63.1579	13	187167959	AAGCATAATGAAGAATAAAGAATAAAGTGGGGCCAGGTGCAGTGGCTCATGCTTGTACTTCCAG
IGH_NC_044616.1	-	86585094	86585126	CACCGTG	GGGTTTCTG	IGHJ1*01	+	100	52	86585035	CACCGTGGCTGAATACTTCCAGCACTGGGGCCAGGGCACCCTGGTCACCGTCTCCTCAG
IGH_NC_044616.1	-	86584480	86584513	CCCTGTG	GGGTTTGTG	IGHJ3*01	+	100	13	86584423	CCCTGTGTGATGCTTTTGATATCTGGGGCCAAGGGACAATGGTCACCGTCTCTTCAG
IGH_NC_044616.1	-	86584120	86584153	CAATGTG	AGGTTTTTG	IGHJ4*01	+	100	22	86584065	CAATGTGACTACTTTGACTACTGGGGCCAGGGAACCCTGGTCACCGTCTCCTCAG
IGH_NC_044616.1	-	86583121	86583153	CATTGTG	GGGTTTTTG	IGHJ6*01	+	100	17	86583051	CATTGTGATTACTACTACTACTACTACATGGACGTCTGGGGCAAAGGGACCACGGTCACCGTCTCCTCAG
IGH_NC_044605.1	+	35661084	35661051	GCCTGTG	GATTTTTTG	IGHJ1*01	-	68.0851	11	35661091	TTTTTCTTTTCTTGTAATATTATTGTCTGGCTTTGGTATCAGAGTAATGC
IGH_NC_044605.1	+	34974532	34974501	CCATGTG	GGGTTGTTG	IGHJ3*01	+	61.2245	13	34974539	GGAAAGACATAAATATTGGGGCCAGGGCAGAATGCTATGGTATGAGTGTC
IGH_NC_044622.1	+	24560625	24560594	CAATGTG	GCGTTTTTG	IGHJ2*01	-	70.9091	7	24560632	TGATGGAAGACAGTTGATCGGGGGGCACGTGCCCCTGGCATCACATACCTGGAAGGGGCTGGGTCAAGGC

## Sheet: orangutan
contig	reference strand	heptamer index	nonamer index	heptamer	nonamer	best aligned human gene	alignment direction	alignment PI	longest common k-mer	start of gene	gene sequence
IGH_NC_036917.1	-	87804171	87804203	CACCGTG	GGGTTTCTG	IGHJ1*01	+	94.2308	20	87804112	CACCGTGGCCGAATACTTCAAGCACTGGGGCCAGGGCATCCTGGTCACCGTCTCCTCAG
IGH_NC_036917.1	-	87803964	87803996	GGCTGTG	GTGTTTTTG	IGHJ2*01	+	98.1132	25	87803904	GGCTGTGCTACTGGTACTTCGATCTCTGGGGCCGTGGCACCCTGGTCACCGTCTCCTCAG
IGH_NC_036917.1	-	87803349	87803382	CCCTGTG	GGGTTTGTG	IGHJ3*01	+	88	8	87803292	CCCTGTGTGATGCTTTTGATATCTGGGGCCTAGGGGTCGTGGTCACTGTCTCTTCAG
IGH_NC_036917.1	-	87802975	87803008	CAATGTG	AGGTTTTTG	IGHJ4*01	+	93.75	15	87802920	CAATGTGACTACTTTCAGTACTGGGGCCAGGGAACCCTGCTCACCGTCTCCTCAG
IGH_NC_036917.1	-	87801970	87802002	CATTGTG	GGGTTTTTG	IGHJ4*01	+	82.3529	18	87801909	CATTGTGATTACTACGGTATGGACTTCTGGGACCAAGGGACCATGGTCACCGTCTCCTCAG
IGH_NC_036917.1	-	87804171	87804203	CACCGTG	GGGTTTCTG	IGHJ1*01	+	94.2308	20	87804112	CACCGTGGCCGAATACTTCAAGCACTGGGGCCAGGGCATCCTGGTCACCGTCTCCTCAG
IGH_NC_036917.1	-	87803964	87803996	GGCTGTG	GTGTTTTTG	IGHJ2*01	+	98.1132	25	87803904	GGCTGTGCTACTGGTACTTCGATCTCTGGGGCCGTGGCACCCTGGTCACCGTCTCCTCAG
IGH_NC_036917.1	-	87803349	87803382	CCCTGTG	GGGTTTGTG	IGHJ3*01	+	88	8	87803292	CCCTGTGTGATGCTTTTGATATCTGGGGCCTAGGGGTCGTGGTCACTGTCTCTTCAG
IGH_NC_036917.1	-	87802975	87803008	CAATGTG	AGGTTTTTG	IGHJ4*01	+	93.75	15	87802920	CAATGTGACTACTTTCAGTACTGGGGCCAGGGAACCCTGCTCACCGTCTCCTCAG
IGH_NC_036917.1	-	87801970	87802002	CATTGTG	GGGTTTTTG	IGHJ4*01	+	82.3529	18	87801909	CATTGTGATTACTACGGTATGGACTTCTGGGACCAAGGGACCATGGTCACCGTCTCCTCAG

## Sheet: blue_whale_mBalMus1
contig	reference strand	heptamer index	nonamer index	heptamer	nonamer	best aligned human gene	alignment direction	alignment PI	longest common k-mer	start of gene	gene sequence
IGH_Super_scaffold_11	-	176066805	176066838	CATTGTG	GGGTTTTTG	IGHJ4*01	+	82.9787	20	176066750	CATTGTGGCTACAGTGGCCCCTGGGGCCAGGGCCTCCTGGTCACCGTCTCCTCAG
IGH_Super_scaffold_11	-	176065803	176065835	CACAGTG	AGGTTTTTG	IGHJ4*01	+	78.8462	16	176065742	CACAGTGATTACTATAGTATGGACATCTGGGGCCAAGGGATCTCTGTCACCGTCTCCTCAG
IGH_Super_scaffold_11	+	139610916	139610884	GACCGTG	TGGTTTTTG	IGHJ5*01	-	62.7451	12	139610923	CACCTCATCCAGTGCTCAACCCAGGAGACGGTGATCACTTTCCGACTGCACC

## Sheet: bottlenose_dolphin_mTurTru1_mat
contig	reference strand	heptamer index	nonamer index	heptamer	nonamer	best aligned human gene	alignment direction	alignment PI	longest common k-mer	start of gene	gene sequence
IGH_mat_scaffold_11_arrow	+	550131	550098	CATTGTG	GGGTTTTTG	IGHJ5*01	+	82.3529	20	550138	ACCACTGGATACCTGGGGCCAGGGGCTCCTGGTCACCGTCTCCTCAG
IGH_mat_scaffold_11_arrow	+	551099	551067	CACAGTG	AGGTTTTTG	IGHJ6*01	+	77.7778	16	551106	ATTACTGCGGTATAGACGCCTGGGGCCAAGGGATCGATGTCACCGTCTCCTCAGGTAAGAATG
IGH_mat_scaffold_11_arrow	-	9975121	9975152	CACTGGG	GAGTTTATG	IGHJ2*01	-	60.3448	11	9975063	CACTGGGGCCAACTACAGGGCCAGATCCCGGCAGGGGGAGCAAAACCCCAAGAGAGGG
IGH_mat_scaffold_11_arrow	-	33715206	33715238	GGCTGTG	GAGTTTTAG	IGHJ2*01	+	60.7843	11	33715157	GGCTGTGGCTTAGGCCGAGCCGTGGCTAACACGTCAGCTGCTTCCCTGT
IGH_mat_scaffold_32_arrow	-	15842625	15842657	CAATGTG	GGGCTTTTG	IGHJ5*01	+	71.7391	5	15842561	CAATGTGAATTGCTTAGGTGCACTTGGTATCTACTCCCTTGGGAGGCAGGAAACCTAGCGCCGT

## Sheet: Californian_sea_lion_mZalCal1
contig	reference strand	heptamer index	nonamer index	heptamer	nonamer	best aligned human gene	alignment direction	alignment PI	longest common k-mer	start of gene	gene sequence
IGH_S6	+	396414	396381	CAATGTG	AGGTTTTTG	IGHJ4*01	+	89.5833	14	396421	ACAACTTTGCATACTGGGGCCAGGGGACCCTGGTCACCGTGTCCTCAG
IGH_S6	+	397269	397237	CACTGTG	GGGTTTTGG	IGHJ4*01	+	80.3922	13	397276	ATTACTATGGTATGGACTACTGGGGCCAGGGGACCTCAGTCACCGTGTCCTCAG

## Sheet: Canadian_lynx_mLynCan4
contig	reference strand	heptamer index	nonamer index	heptamer	nonamer	best aligned human gene	alignment direction	alignment PI	longest common k-mer	start of gene	gene sequence
IGH_Super_Scaffold_2	+	73727506	73727474	CACTGTT	GAGTTTCTG	IGHJ3*01	-	73.5294	7	73727513	CTGTGCCTTGTCTCCTGAGAAATACAAAAGCTGAGTGCTAACCAATCAGAACTGCAAGTCTTGAGGAAC
IGH_Super_Scaffold_2	+	86806970	86806938	GACTATG	CTGTTTTTG	IGHJ3*01	+	60.7843	11	86806977	GCTTTTTAGTATAATTTGGAATCAAGGAGCATGATACTTCCAGCTTTGTTCTTCT
IGH_Super_Scaffold_2	-	145984319	145984352	CAATGTG	AGGTTTTTG	IGHJ4*01	+	89.5833	10	145984264	CAATGTGACTACTTTGACTACTGGGGCCAAGGAACCGTGGTGACGGTGTCCTCAG

## Sheet: common_marmoset_mCalJac1_matern
contig	reference strand	heptamer index	nonamer index	heptamer	nonamer	best aligned human gene	alignment direction	alignment PI	longest common k-mer	start of gene	gene sequence
IGH_Super_scaffold_mat_12	-	136198345	136198377	CGCTGTG	ATGTTTTTG	IGHJ2*01	+	90.566	10	136198285	CGCTGTGCTACTGGTACTTCGATGTCTGGGGCTCTGGCACCCAGATCACTGTCTCCTCAG
IGH_Super_scaffold_mat_12	-	136197786	136197819	CCCTGTG	GGGTTTGTG	IGHJ3*01	+	94	13	136197729	CCCTGTGTGATGCTTTTGATGTATGGGGCCAAGGGACCATGGTCACCGTCTCTTCAG
IGH_Super_scaffold_mat_12	-	136197439	136197472	CAATGTG	GGGTTTTTG	IGHJ4*01	+	95.8333	22	136197384	CAATGTGATTACTTTGACTACTGGGGCCAGGGGACCCTGGTCACCGTCTCCTCAG
IGH_Super_scaffold_mat_12	-	136197075	136197106	CAATGTG	CGGTTCTTG	IGHJ5*01	+	80.3922	11	136197018	CAATGTGACAGCTGGTCAGCCTCCTCGGGCCAGGGACCCTGGTCACTGCCACCTCAG
IGH_Super_scaffold_mat_12	-	136196463	136196495	CATTGTG	GGGTTTTTG	IGHJ3*01	+	87.5	17	136196402	CATTGTGATTACTATGGTTTGGATCTCTGGGGCCAAGGGACCAAGGTCACCGTCTCCTCAG

## Sheet: Eurasian_red squirrel_mSciVul1
contig	reference strand	heptamer index	nonamer index	heptamer	nonamer	best aligned human gene	alignment direction	alignment PI	longest common k-mer	start of gene	gene sequence
IGH_HiC_scaffold_2_arrow_ctg1	+	110207301	110207268	CACTGGG	GAGTTTCTG	IGHJ3*01	+	70.2128	6	110207308	GATGAATCTGGGGAAGGCAGATGGTCCTTACCCTTGCACTCTCAGACTGGCT
IGH_HiC_scaffold_2_arrow_ctg1	+	1680472	1680441	CCCTGTG	GGGTTCCTG	IGHJ4*01	+	77.5862	20	1680479	CCTATACTGACTTAGACTTCTGGGGCCAGGGCACCCTGGGCACCTTGGGCACCGTCTCCTCAG
IGH_HiC_scaffold_2_arrow_ctg1	+	1681013	1680980	CGATGTG	AGGTTTCTG	IGHJ4*01	+	92.6829	36	1681020	GCTAAGTACTGGGGCCAGGGCACCCTGGTCACCGTCTCCTCAGGTGAG
IGH_HiC_scaffold_2_arrow_ctg1	+	1681314	1681281	CAGTGTG	AGGTTTCTG	IGHJ4*01	+	95.8333	36	1681321	ATTACTTTGACTACTGGGGCCAGGGCACCCTGGTCACCGTCTCCTCAG
IGH_HiC_scaffold_2_arrow_ctg1	-	123252789	123252820	TCCTGTG	GGGTTTTTG	IGHJ4*01	+	72	6	123252726	TCCTGTGTTGCTCAAACTGACCTTGAACTTCTGGGCTCAAGGGACCCTCTCACCTCAGCTCTG
IGH_HiC_scaffold_2_arrow_ctg1	-	186113563	186113596	CACTGAG	GGGTTCCTG	IGHJ2*01	-	62.069	14	186113502	CACTGAGAGCTGTGGGAAAAGCAGTGTTTCCAGGAACAGAGCCAGTGCTGGAAGTCGAGAA

[truncated: 11 more sheets: European_otter_mLutLut1, greater_horseshoe_bat_mRhiFer1, grey_squirrel_mSciCar1, Kuhls_pipistrelle_mPipKuh1, pale_spear-nosed_bat_mPhyDis1, Pallass_mastiff_bat_mMolMol1, platypus_mOrnAna1, ring-tailed_lemur_mLemCat1, southern_two-toed_sloth_mChoDid, stoat_mMusErm1, vaquita_mPhoSin1]
